# Supplementary material for: Enzymatic Synthesis of 2-Chloropurine Arabinonucleosides with Chiral Amino Acid Amides at the C6 Position and an Evaluation of Antiproliferative Activity In Vitro
Source: MDPI journal article supplement (doi:10.3390/ijms24076223), 2023-03-25
Supplement: s1 [file s1]

## Enzymatic Synthesis of 2-Chloropurine Arabinonucleosides with Chiral Amino Acid Amides at the C6 Position and an Evaluation of Antiproliferative Activity In Vitro

Barbara Z. Eletskaia<sup>1,\*</sup>, Maria Ya. Berzina<sup>1</sup>, Ilya V. Fateev<sup>1</sup>, Alexei L. Kayushin<sup>1</sup>, Elena V. Dorofeeva<sup>1</sup>, Olga I. Lutonina<sup>1</sup>, Ekaterina A. Zorina<sup>1</sup>, Konstantin V. Antonov<sup>1</sup>, Alexander S. Paramonov<sup>1</sup>, Inessa S. Muzyka<sup>1</sup>, Olga S. Zhukova<sup>2</sup>, Mikhail V. Kiselevskiy<sup>2</sup>, Anatoly I. Miroshnikov<sup>1</sup>, Roman S. Esipov<sup>1</sup>, and Irina D. Konstantinova<sup>1,\*</sup>

<sup>1</sup> Shemyakin and Ovchinnikov Institute of Bioorganic Chemistry, Russian Academy of Sciences, Miklukho-Maklaya St. 16/10, 117997 Moscow, Russia

<sup>2</sup> State N.N. Blokhin Russian Cancer Research Center, Kashirsky Highway, 24, 115478, Moscow, Russia

\* Correspondence: fraubarusya@gmail.com (B.Z.E.); kid1968@yandex.ru (I.D.K.)

| Content                                                                         | Page number |
|---------------------------------------------------------------------------------|-------------|
| NMR spectra and HPLC data of compounds <b>1b-12b</b> .                          | 2-47        |
| Synthesis and NMR spectra and HPLC data of compounds <b>15</b> and <b>16</b>    | 48-52       |
| Synthesis and NMR spectra and HPLC data of arabinosides <b>13</b> and <b>14</b> | 53-59       |
| Lineweaver–Burk plots for the adenosine deamination                             | 60          |

## NMR spectra and HPLC data of compounds 1b-12b.

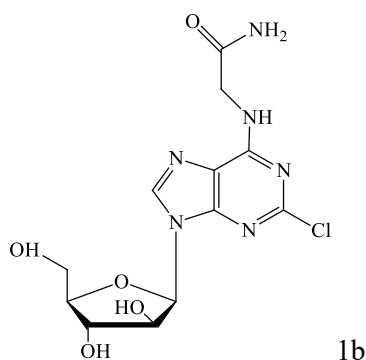

### 9-β-D-arabinofuranosyl-2-chloro-6-(N<sup>a</sup>-glycinylamido)-purine (1b)

<sup>1</sup>H NMR (700 MHz, DMSO-*d*<sub>6</sub>, 30 °C): δ= 8.25 and 8.22 (2 s, 0.60H and 0.16H, H-8), 8.12 and 8.01 (2 s, 0.78H and 0.17H, C6-NH), 7.41 and 7.05 (2 sign., 1H, CO-NH), 7.41 and 7.01 (2 sign., 1H, CO-NH), 6.17 (d, *J* = 5.2 Hz, 0.81H, H-1'), 5.64 (br.s., 0.90H, 2'-OH), 5.52 (s, 1H, 3'-OH), 5.05 (s, 0.89H, 5'-OH), 4.19 (m, 1H, H-2'), 4.13 (m, 1H, H-3'), 3.99 (br.sign., 1.65H, NH-CH<sub>2</sub>), 3.79 (m, 1H, H-4'), 3.68 (m, 1H, H-5'a), 3.65 (m, 1H, H-5'b) ppm.

<sup>13</sup>C NMR (176 MHz, DMSO-*d*<sub>6</sub>, 30 °C): δ= 140.39 (C8), 83.36 (C1'), 83.75 (C4'), 75.22 (C2'), 74.29 (C3'), 60.30 (C5'), 42.43 (NH-CH<sub>2</sub>) ppm.

<sup>15</sup>N NMR (71 MHz, DMSO-*d*<sub>6</sub>, 30 °C): δ= 239.30 (N7), 169.16 (N9), 103.67 (CO-NH<sub>2</sub>), 85.17 (C6-NH) ppm.

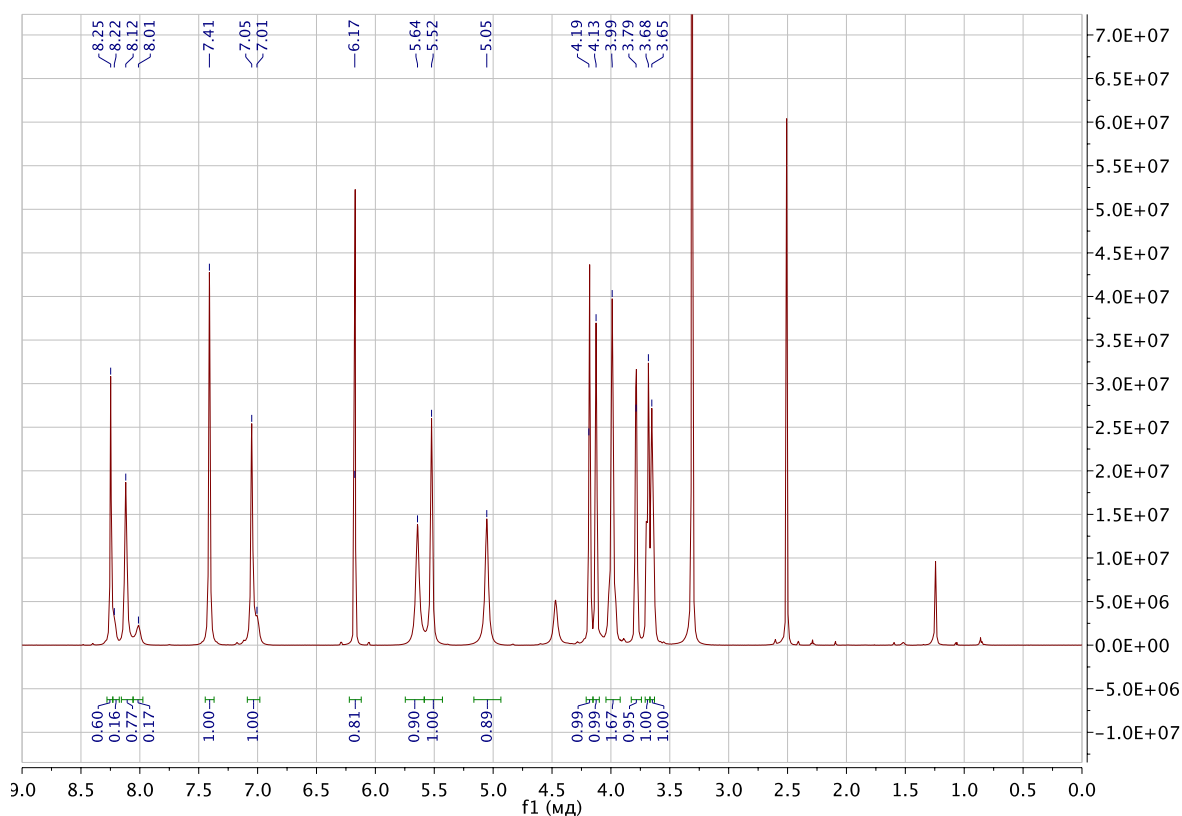

**Figure SI-1.** The <sup>1</sup>H NMR spectrum of 9-β-D-arabinofuranosyl-2-chloro-6-(N<sup>a</sup>-glycinylamido)-purine (1b)

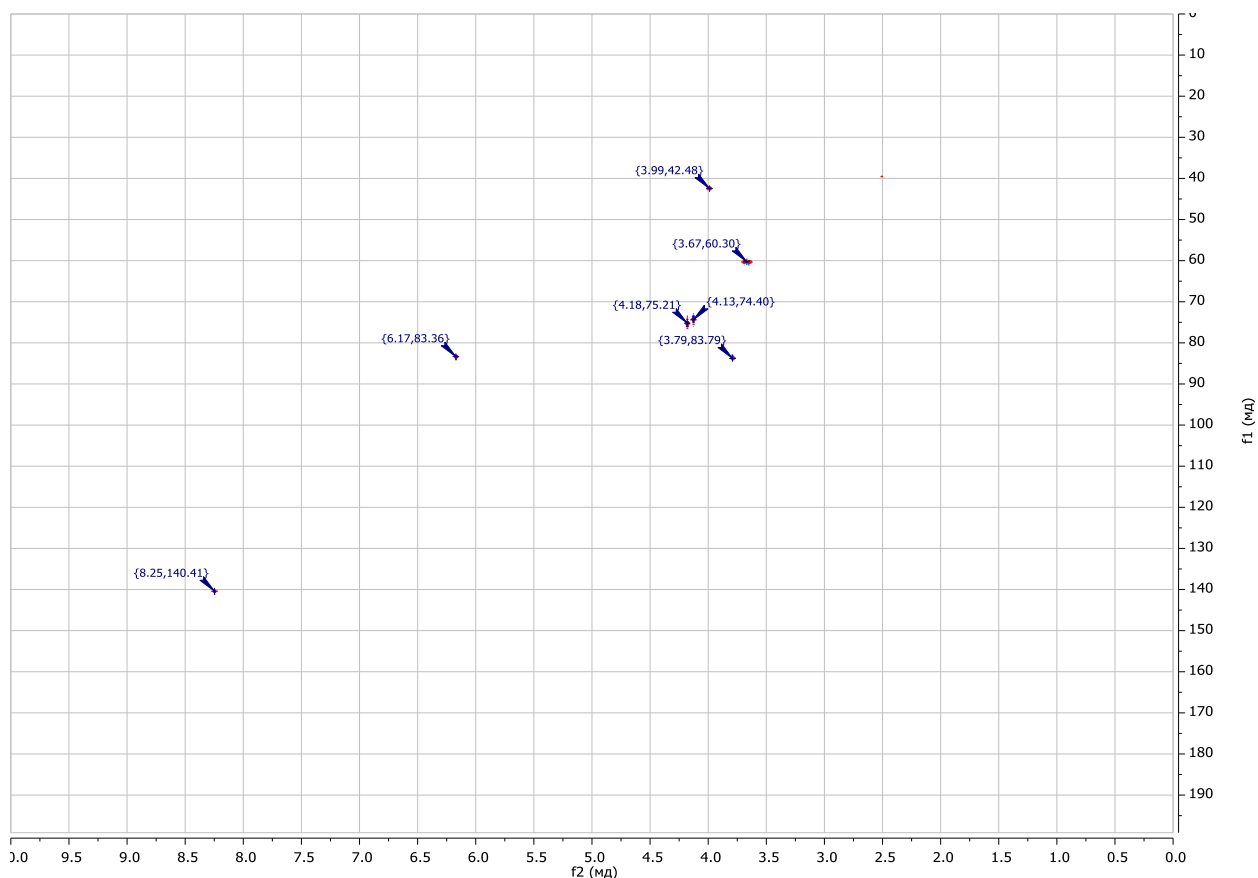

**Figure SI-2.** The  $^{13}\text{C}$  HSQC NMR spectrum of 9- $\beta$ -D-arabinofuranosyl-2-chloro-6-( $\text{N}^{\alpha}$ -glycinylamido)-purine (1b)

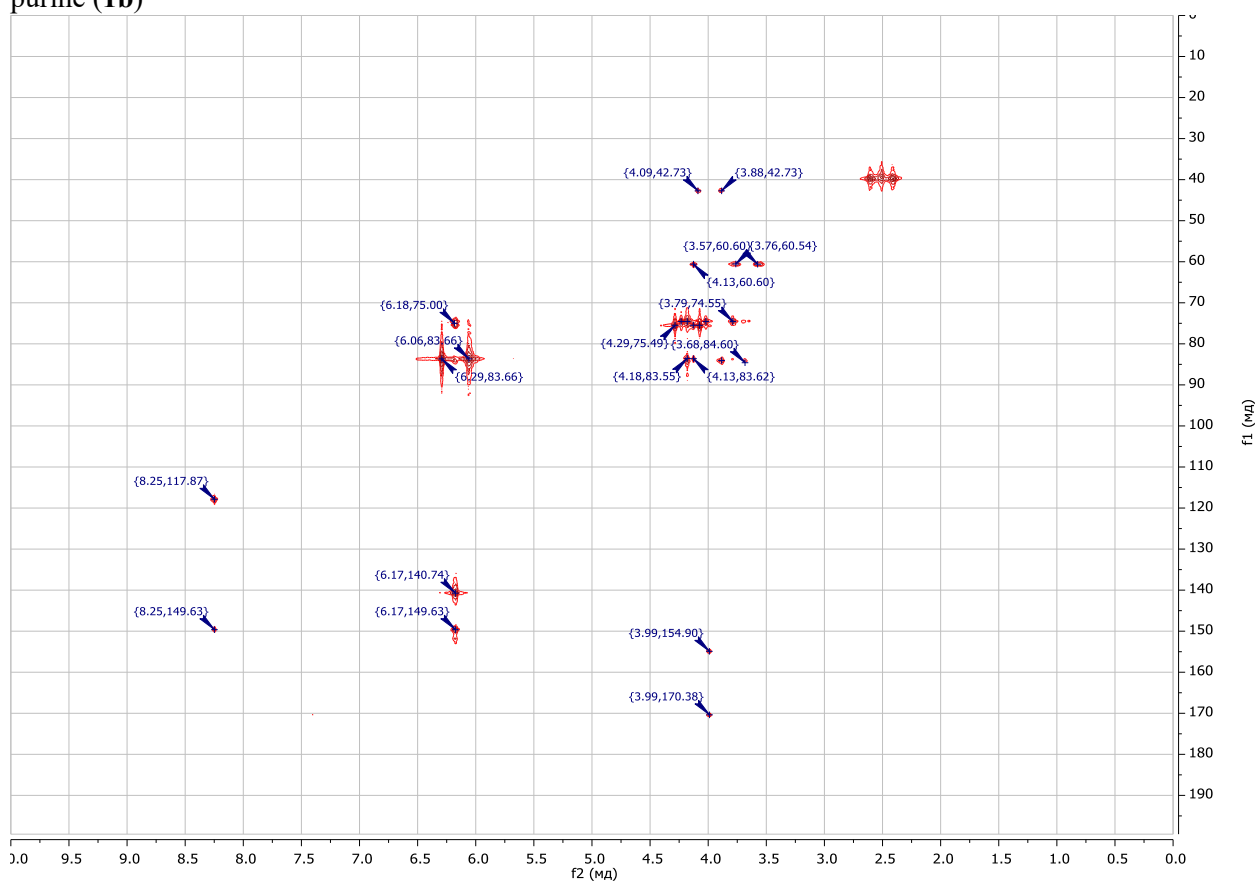

**Figure SI-3.** The  $^{13}\text{C}$  HMBC NMR spectrum of 9- $\beta$ -D-arabinofuranosyl-2-chloro-6-( $\text{N}^{\alpha}$ -glycinylamido)-purine (1b)

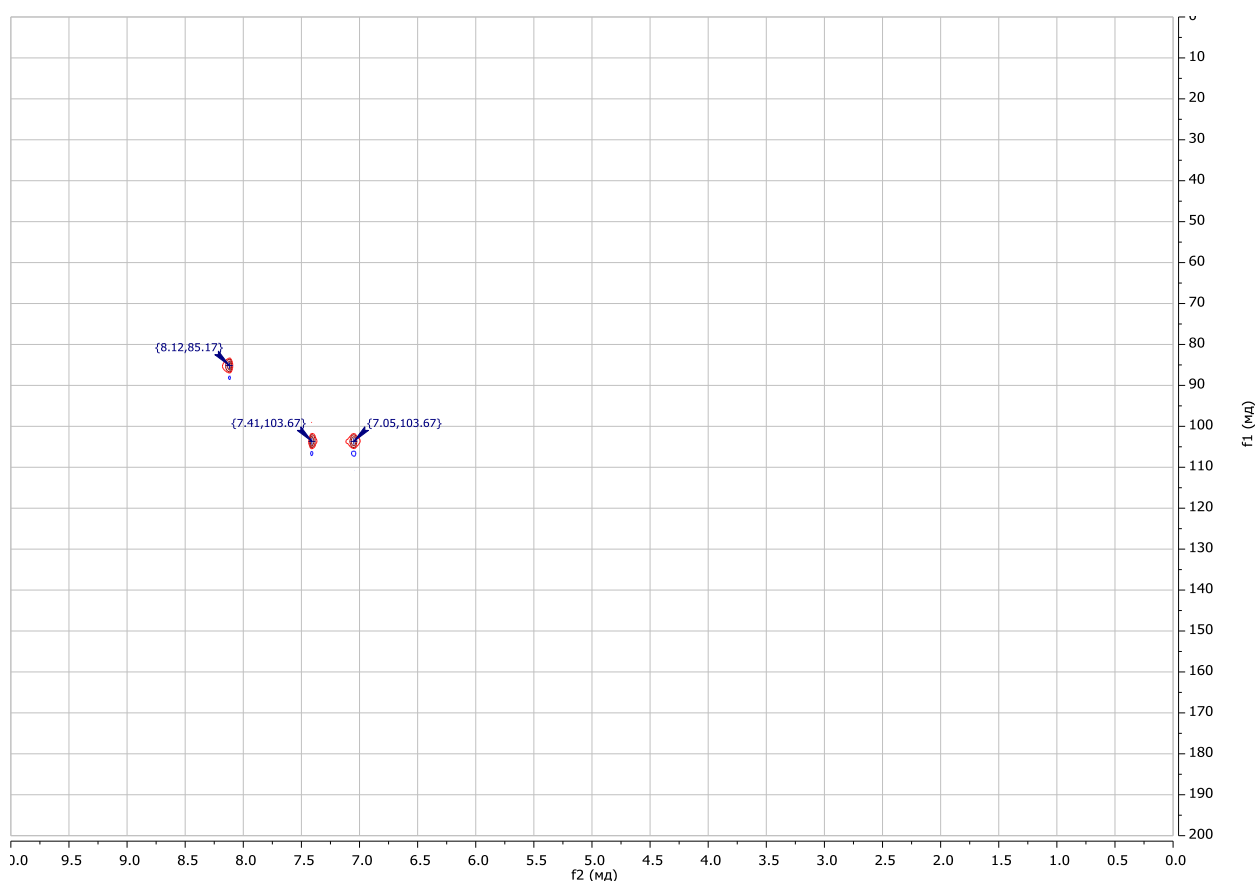

**Figure SI-4.** The  $^{15}\text{N}$  HSQC NMR spectrum of 9- $\beta$ -D-arabinofuranosyl-2-chloro-6-( $\text{N}^{\alpha}$ -glycinylamido)-purine (1b)

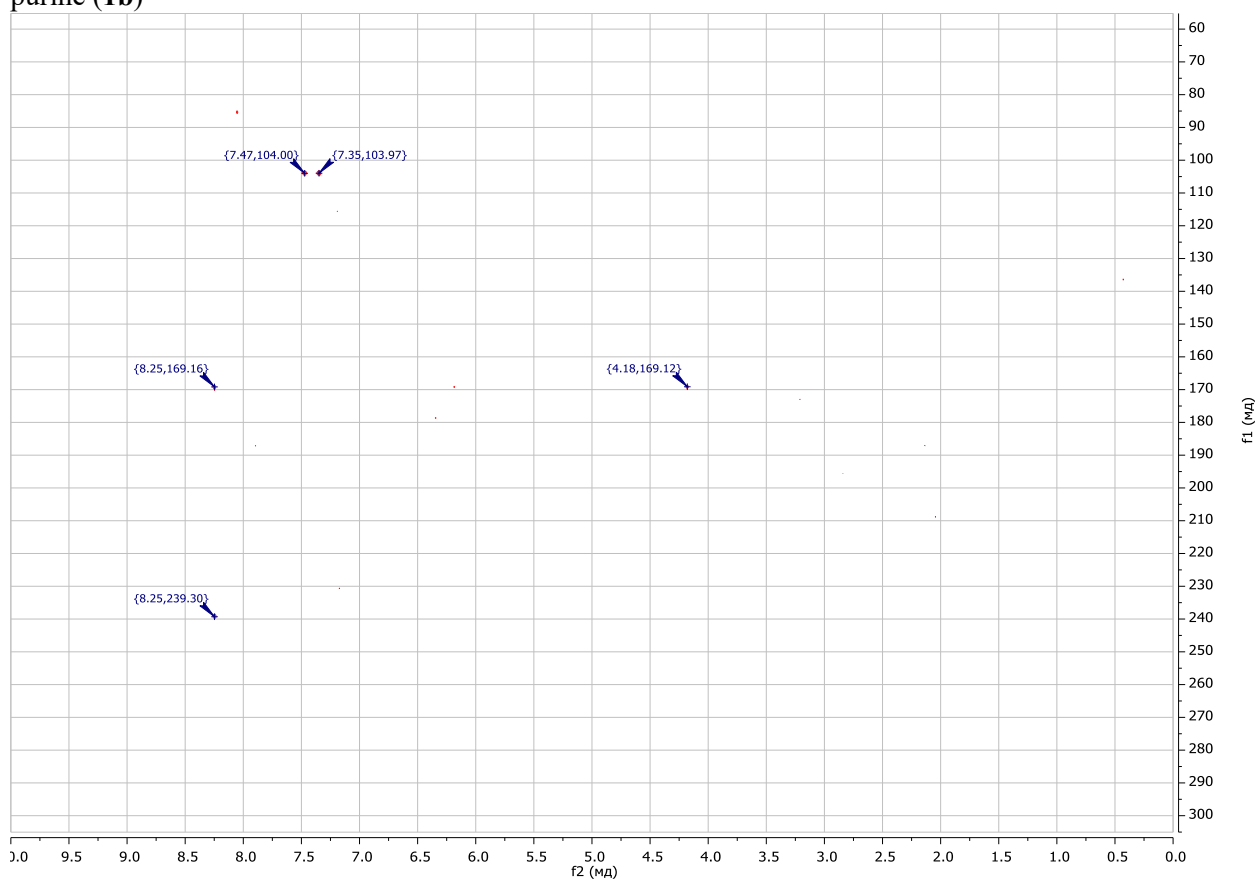

**Figure SI-5.** The  $^{15}\text{N}$  HMBC NMR spectrum of 9- $\beta$ -D-arabinofuranosyl-2-chloro-6-( $\text{N}^{\alpha}$ -glycinylamido)-purine (1b)

BT

Project Name: TESTLast\_1  
 Reported by User: System

Breeze

## SAMPLE INFORMATION

|                   |               |                  |                     |
|-------------------|---------------|------------------|---------------------|
| Sample Name:      | <b>1b</b>     | Acquired By:     | System              |
| Sample Type:      | Unknown       | Date Acquired:   | 12.05.2014 11:01:08 |
| Vial:             | 1             | Acq. Method:     | 100B_dual_280       |
| Injection #:      | 1             | Date Processed:  | 19.05.2014 12:44:26 |
| Injection Volume: | 5,00 µl       | Channel Name:    | 2487Channel 2       |
| Run Time:         | 20,00 Minutes | Sample Set Name: |                     |
| Column Type:      |               |                  |                     |

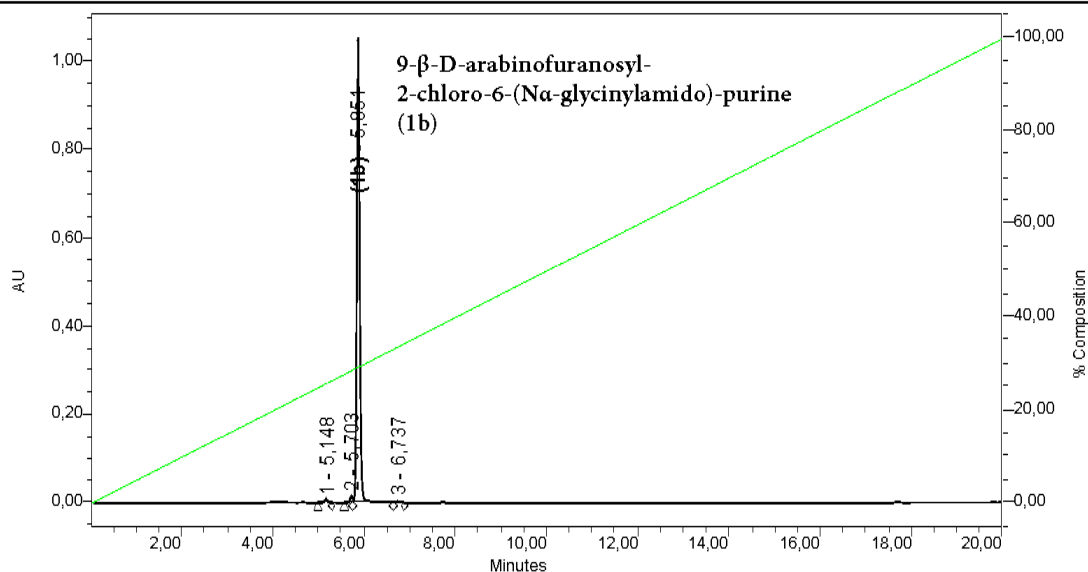

|   | Peak Name | RT (min) | Area (µV*sec) | % Area | Height (µV) | % Height |
|---|-----------|----------|---------------|--------|-------------|----------|
| 1 | 1         | 5,148    | 41892         | 0,88   | 7514        | 0,72     |
| 2 | 2         | 5,703    | 68452         | 1,44   | 15749       | 1,50     |
| 3 | <b>1b</b> | 5,851    | 4623441       | 97,23  | 1021351     | 97,45    |
| 4 | 3         | 6,737    | 21212         | 0,45   | 3447        | 0,33     |

Report Method: Gradient Overlay Report ASC

Printed 12:44:33

19.05.2014

Page: 1 of 1

Figure SI-6. The chromatogram of **1b**

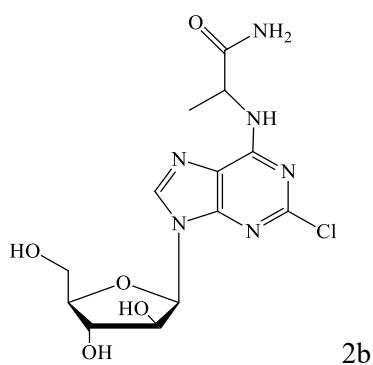

2b

**9-β-D-arabinofuranosyl-2-chloro-6-(N<sup>α</sup>-L-alaninylamido)-purine (2b)**

<sup>1</sup>H NMR (700 MHz, DMSO-*d*<sub>6</sub>, 30 °C): δ= 8.25(1 s, 1H, H-8), 7.87 and 7.86 (br.d., *J* = 6.0 Hz, 1 H, C6-NH), 7.44 and 7.08 (2 sign., 1H, CO-NH), 7.44 and 7.05 (2 sign., 1H, CO-NH), 6.17 (d, *J* = 4.7 Hz, 1H, H-1'), 5.63 (d, *J* = 4.7 Hz, 1H, 2'-OH), 5.52 d., *J* = 3.9 Hz, 1H, 3'-OH), 5.05 (br.sign, 1H, 5'-OH), 4.61 (br.sign., 1H, NH-CH), 4.18 (m, 1H, H-2'), 4.12 (m, 1H, H-3'), 3.79 (m, 1H, H-4'), 3.68 and (m, 1H, H-5'a), 3.66 (m, 1H, H-5'b), 1.42 (d., *J* = 6.9 Hz, 3H, CH<sub>3</sub>) ppm.

<sup>13</sup>C NMR (176 MHz, DMSO-*d*<sub>6</sub>, 30 °C): δ= 140.48 (C8) 83.78 (C4'), 83.41 (C1'), 75.21 (C2'), 74.29 (C3'), 60.30 (C5'), 48.88 (NH-CH), 18.07 (CH<sub>3</sub>) ppm.

<sup>15</sup>N NMR (71 MHz, DMSO-*d*<sub>6</sub>, 30 °C) δ= 239.17 (N7), 169.09 (N9), 105.94 (CO-NH<sub>2</sub>), 97.99 (C6-NH) ppm.

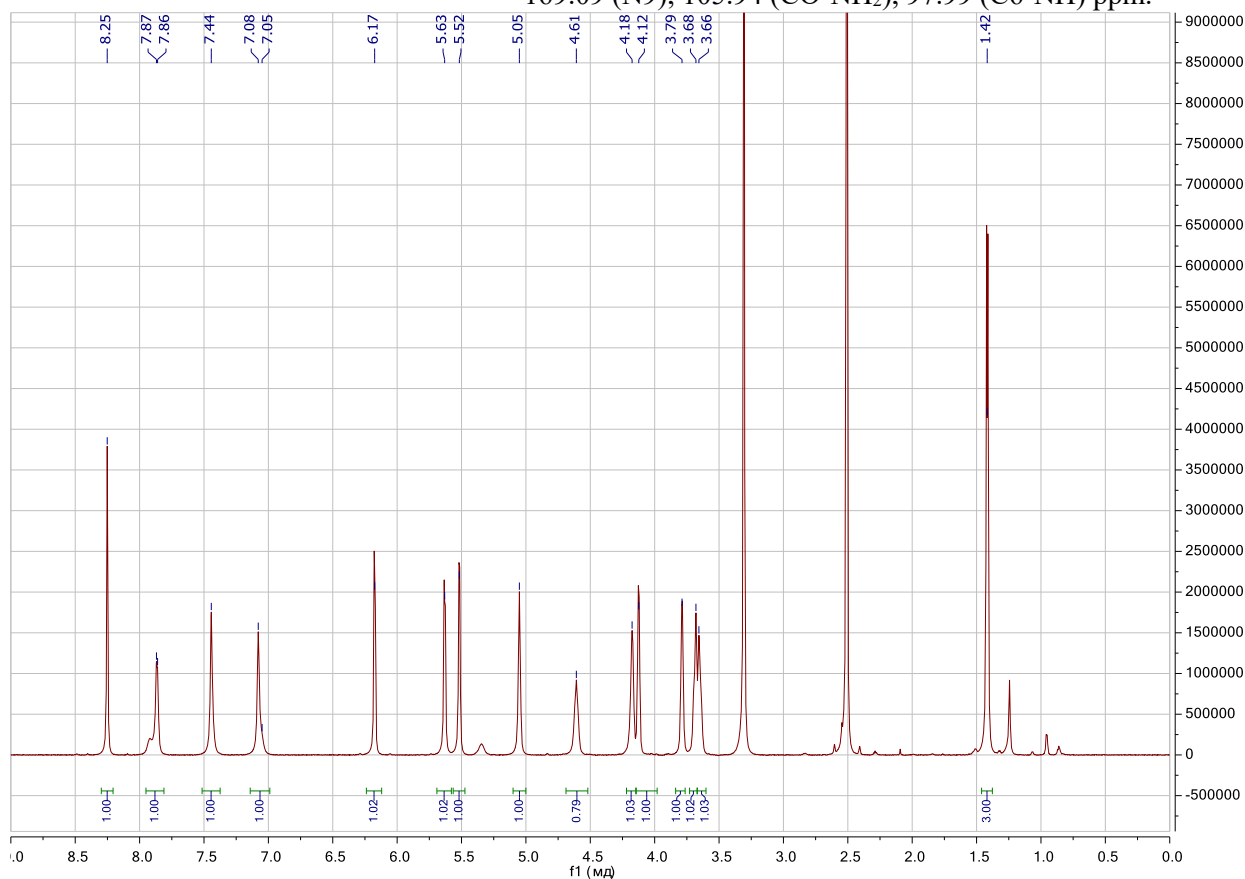

**Figure SI-7.** The <sup>1</sup>H NMR spectrum of 9-β-D-arabinofuranosyl-2-chloro-6-(N<sup>α</sup>-L-alaninylamido)-purine (2b)

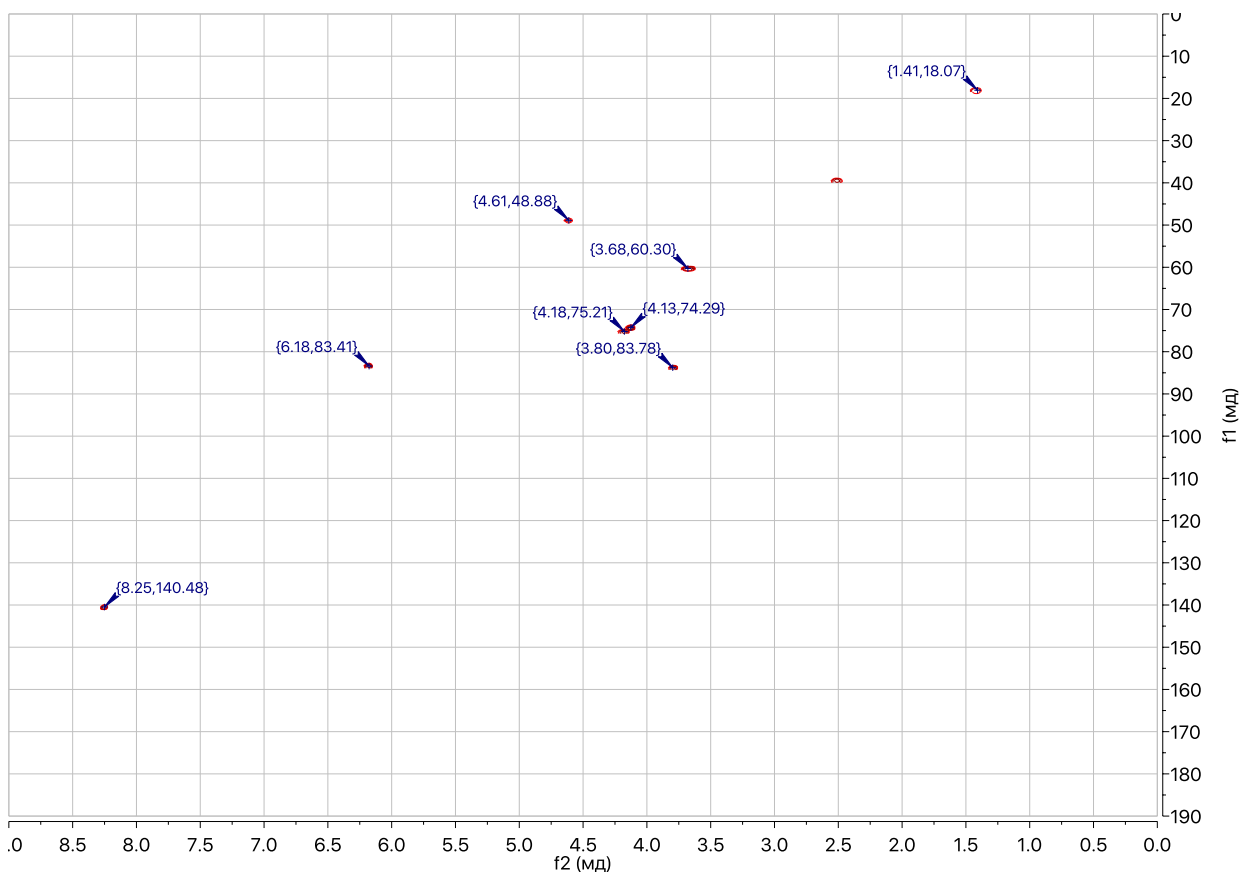

**Figure SI-8.** The  $^{13}\text{C}$  HSQC NMR spectrum of 9- $\beta$ -D-arabinofuranosyl-2-chloro-6-( $\text{N}^{\alpha}$ -L-alaninylamido)-purine (**2b**)

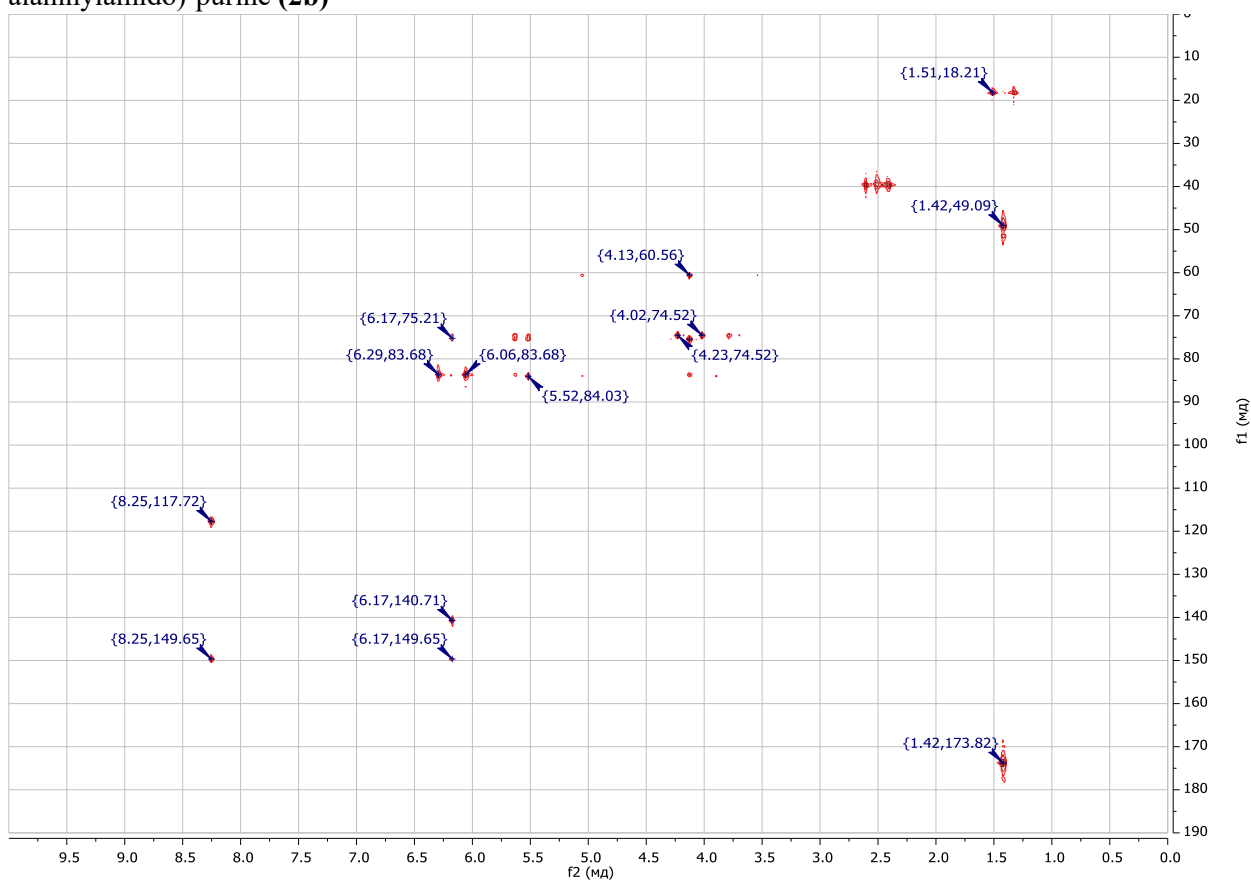

**Figure SI-9.** The  $^{13}\text{C}$  HMBC NMR spectrum of 9- $\beta$ -D-arabinofuranosyl-2-chloro-6-( $\text{N}^{\alpha}$ -L-alaninylamido)-purine (**2b**)

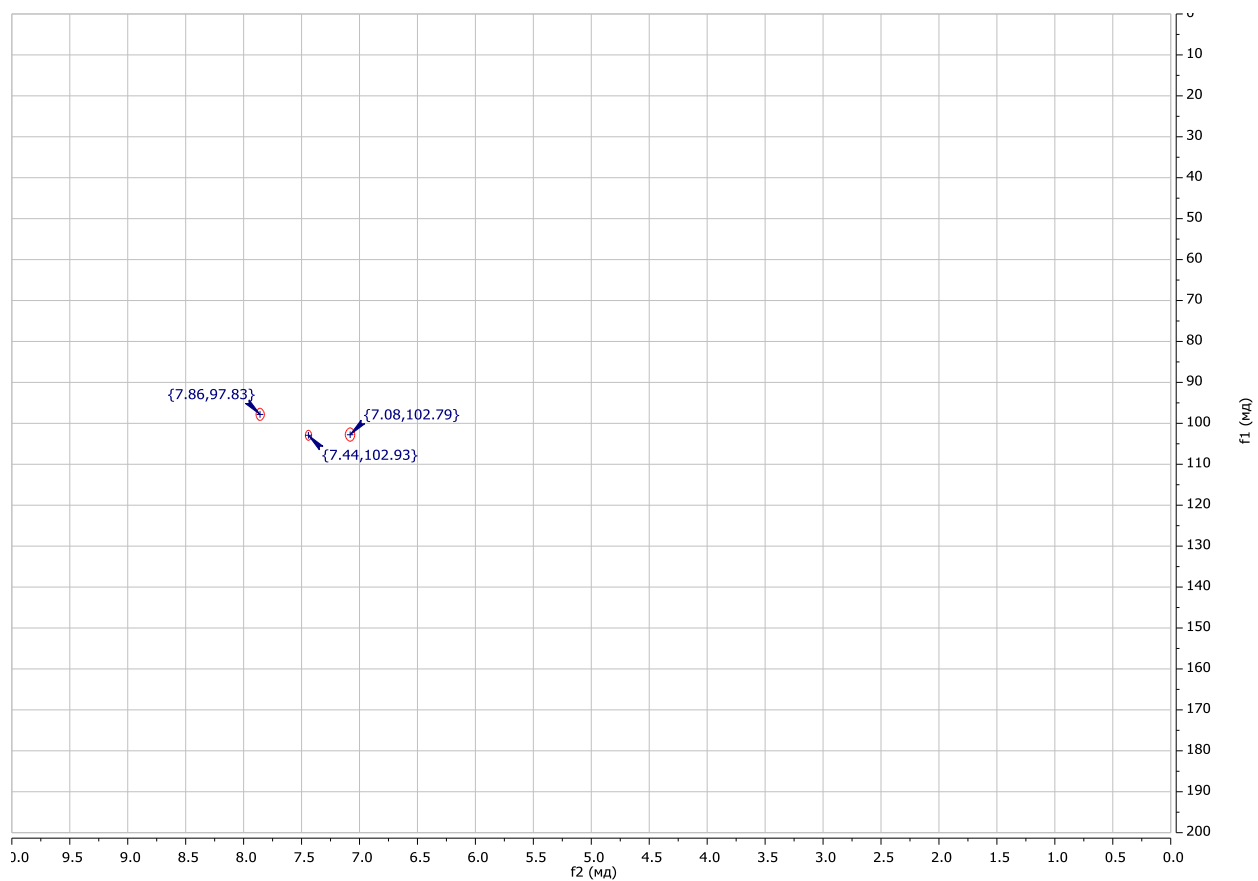

**Figure SI-10.** The  $^{15}\text{N}$  HSQC NMR spectrum of 9- $\beta$ -D-arabinofuranosyl-2-chloro-6-( $\text{N}^{\alpha}$ -L-alaninylamido)-purine (**2b**)

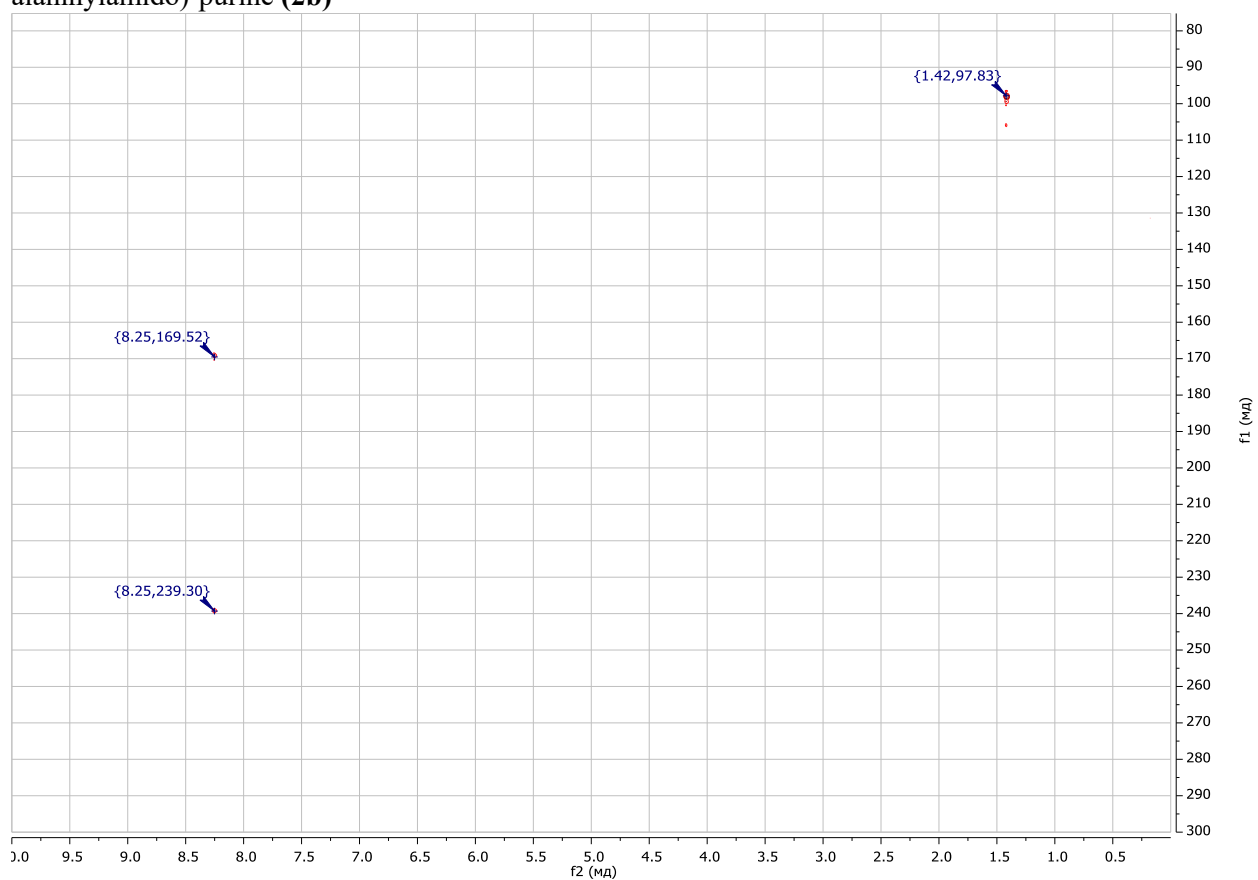

**Figure SI-11.** The  $^{15}\text{N}$  HMBC NMR spectrum of 9- $\beta$ -D-arabinofuranosyl-2-chloro-6-( $\text{N}^{\alpha}$ -L-alaninylamido)-purine (**2b**)

## SAMPLE INFORMATION

Sample Name: **2b**  
 Sample Type: Unknown  
 Vial: 1  
 Injection #: 1  
 Injection Volume: 15,00 µl  
 Run Time: 20,00 Minutes  
 Column Type:

Acquired By: System  
 Date Acquired: 13.05.2013 17:42:38  
 Acq. Method: 100B\_dual\_280  
 Date Processed: 13.05.2013 19:03:34  
 Channel Name: 2487Channel 2  
 Sample Set Name:

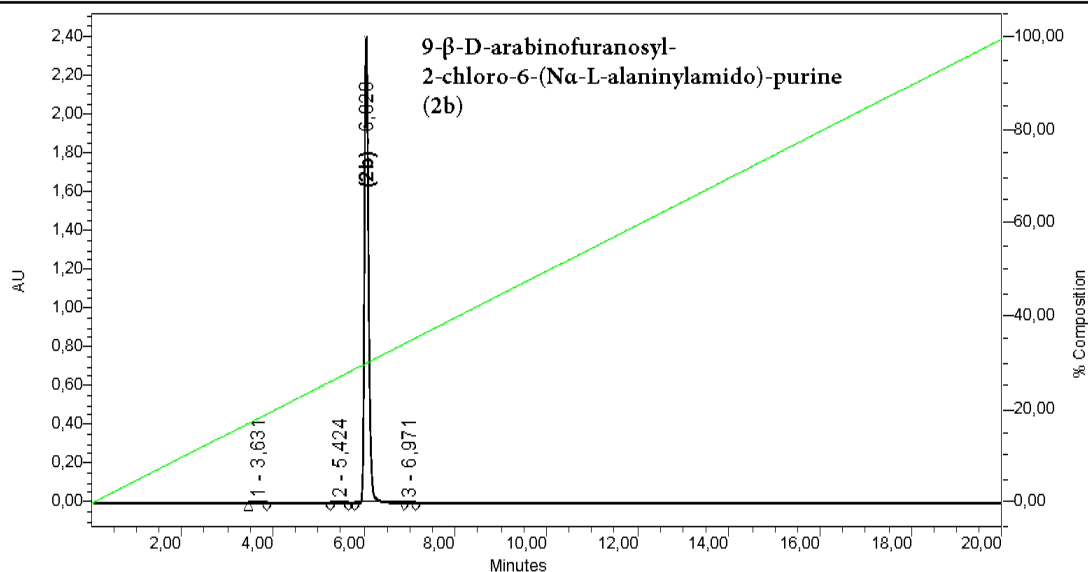

|   | Peak Name | RT (min) | Area (V*sec) | % Area | Height (V) | % Height |
|---|-----------|----------|--------------|--------|------------|----------|
| 1 | 1         | 3,631    | 15291        | 0,10   | 1632       | 0,07     |
| 2 | 2         | 5,424    | 17430        | 0,12   | 1846       | 0,08     |
| 3 | <b>2b</b> | 6,028    | 15112678     | 99,72  | 2416720    | 99,81    |
| 4 | 3         | 6,971    | 10050        | 0,07   | 1043       | 0,04     |

Figure SI-12. The chromatogram of **2b**

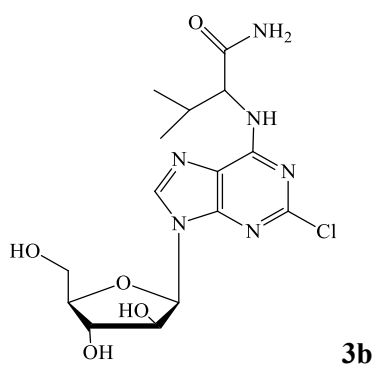

**3b**

**9-β-D-arabinofuranosyl-2-chloro-6-(N<sup>α</sup>-L-valinylamido)-purine (3b)**

<sup>1</sup>H NMR (700 MHz, DMSO-*d*<sub>6</sub>, 30 °C): δ= 8.27 (s, 1H, H-8), 7.77 and 7.43 (2 sign, 0.2H and *J* = 7.65Hz, 0.78H, C6-NH), CO-NH, 7.54 and 7.14 (2 sign, 0.8H and 0.23H, CO-NH), 7.37 and 7.18 (2 sign, 0.22H and 0.77H, CO-NH), 6.18 (d, *J* = 7.65 Hz, 1H, H-1'), 5.63 (br.sign, 1H, 2'-OH), 5.54 (br.sign, 1H, 3'-OH), 5.32 and 5.06 (2 sign, 0.2H and 0.8H, 5'-OH), 4.63 (m, 0.8H, CβH) 4.18 (m, 1H, H-2'), 4.13 (m, 1H, H-3') 3.79 (m, 1H, H-4') 3.69 (m, 1H, H-5'a), 3.65 (m, 1H, H-5'b), 2.18 (m, 1H, CαH) 0.96 (m, 3H, CH<sub>3</sub>) 0.94 (m, 3H, CH<sub>3</sub>) ppm.

<sup>13</sup>C NMR (176 MHz, DMSO-*d*<sub>6</sub>, 30 °C): δ= 172.40 (CO-NH<sub>2</sub>), 154.57 (C6), 152.62 (C2), 149.69 (C4), 140.90 (C8), 117.68 (C5), 84.06 (C4'), 83.74 (C1'), 75.47 (C2'), 74.52, (C3'), 60.57 (C5'), 58.86 (Cα), 30.54 (Cβ), 19.14 (CH<sub>3</sub>), 18.29 (CH<sub>3</sub>) ppm.

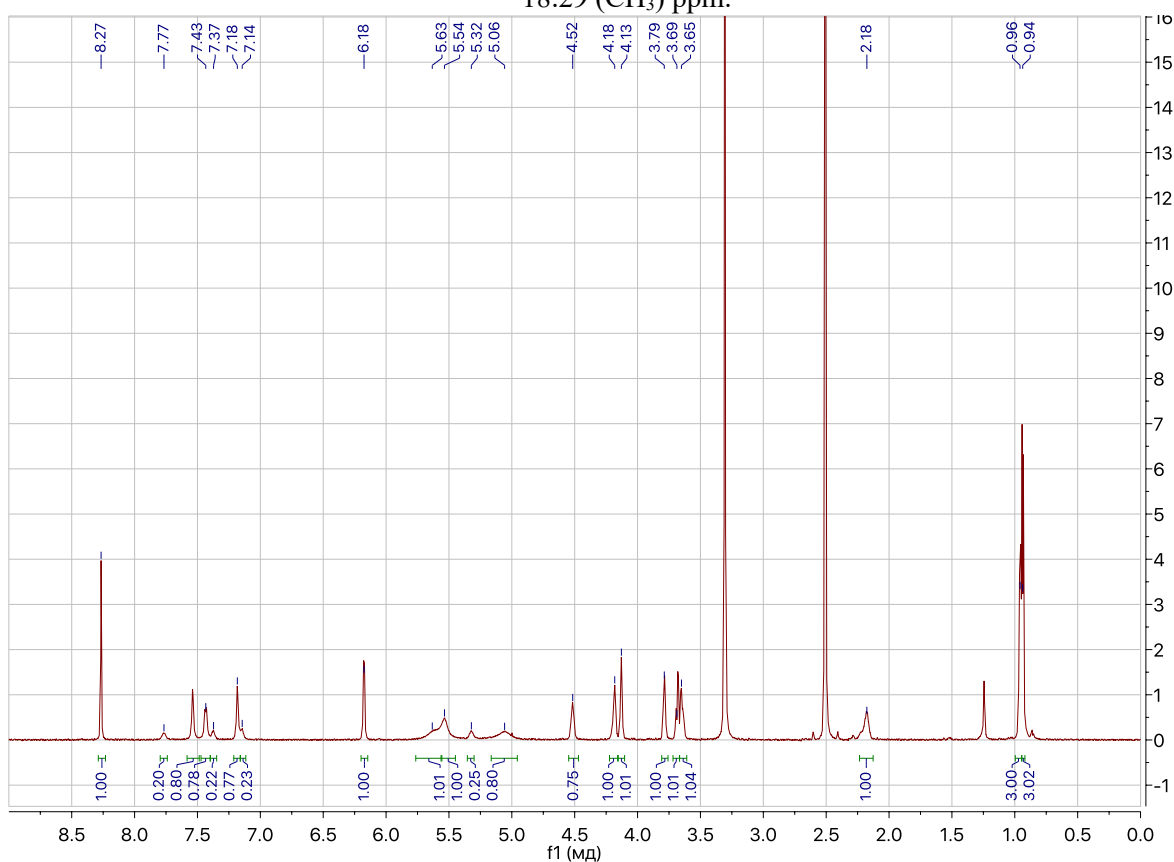

**Figure SI-13.** The <sup>1</sup>H NMR spectrum of 9-β-D-arabinofuranosyl-2-chloro-6-(N<sup>α</sup>-L-valinylamido)-purine (3b)

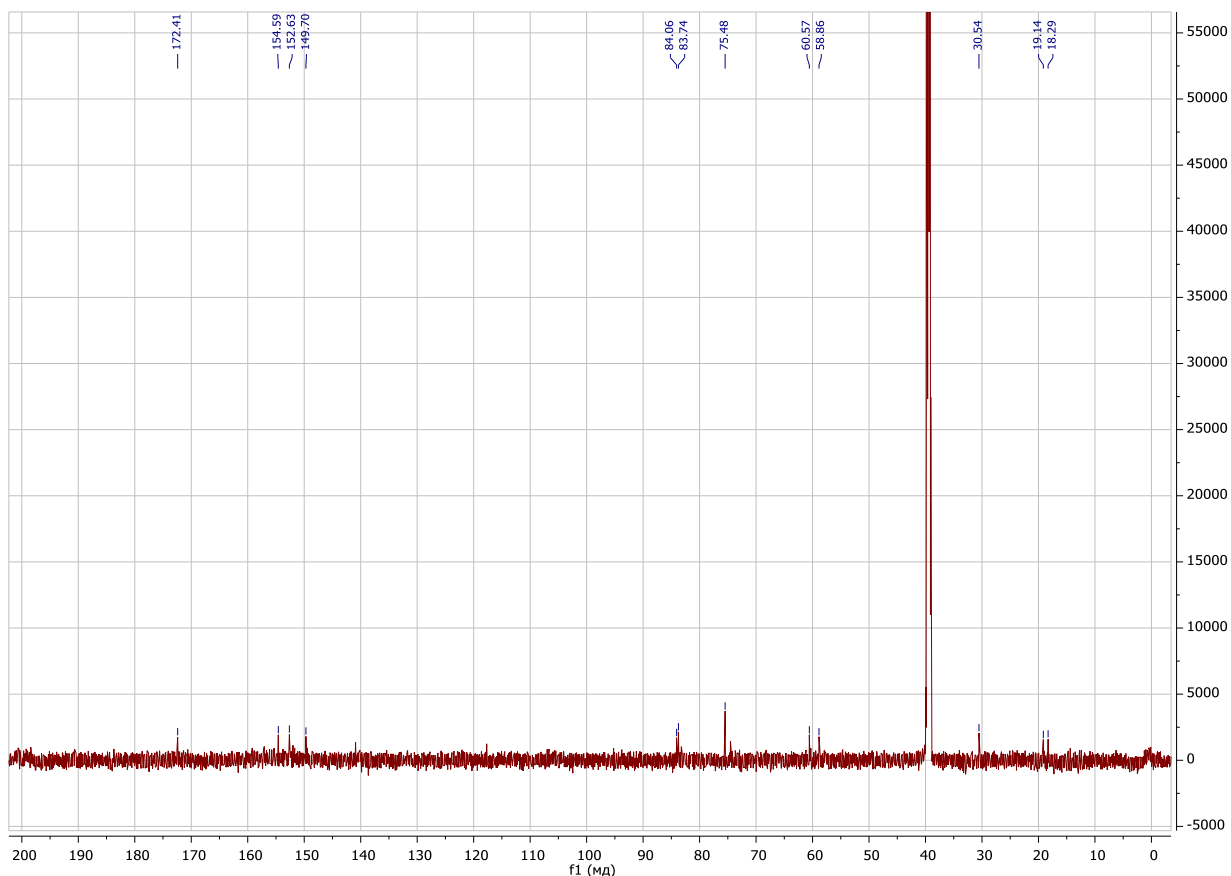

**Figure SI-14.** The  $^{13}\text{C}$  NMR spectrum of 9- $\beta$ -D-arabinofuranosyl-2-chloro-6-( $\text{N}^{\alpha}$ -L-valinylamido)-purine (**3b**)

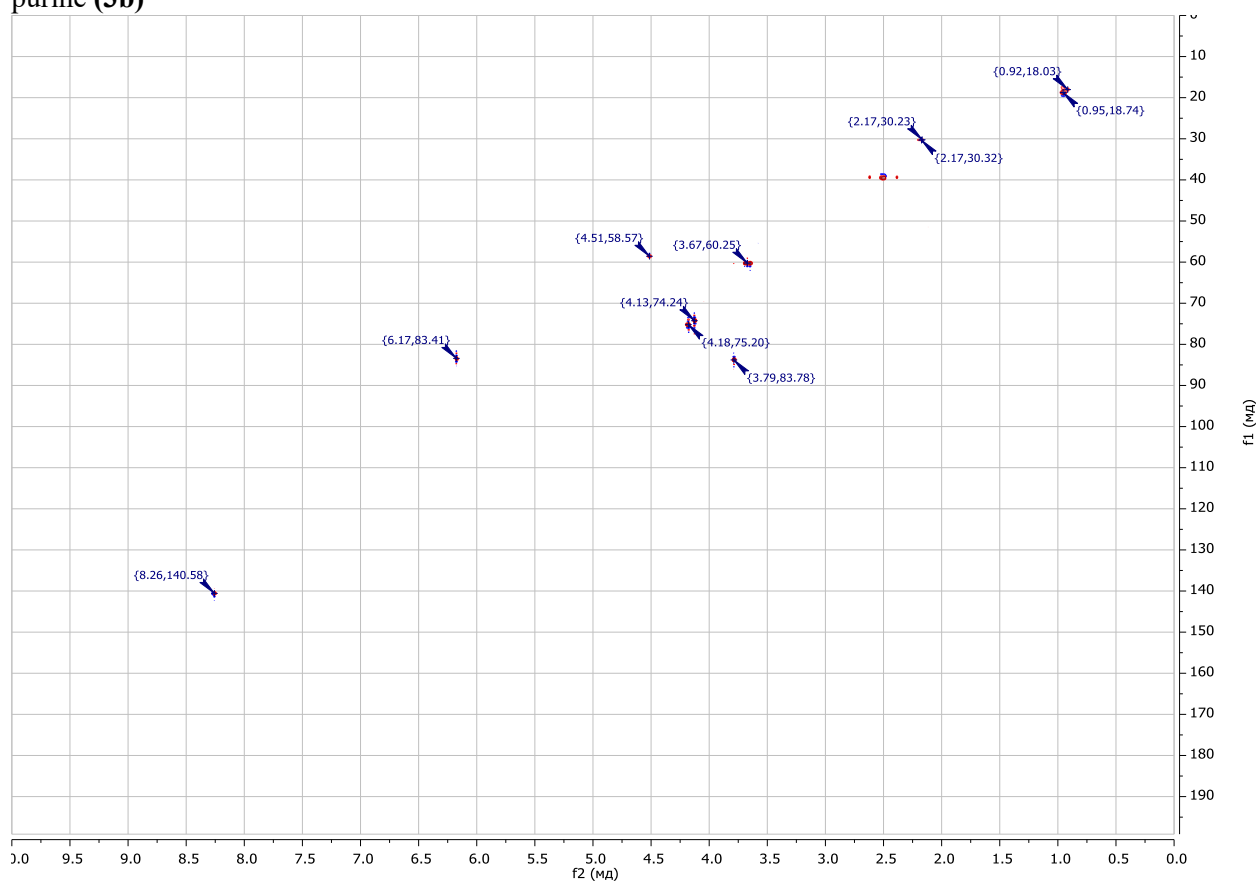

**Figure SI-15.** The  $^{13}\text{C}$  HSQC NMR spectrum of 9- $\beta$ -D-arabinofuranosyl-2-chloro-6-( $\text{N}^{\alpha}$ -L-valinylamido)-purine (**3b**)

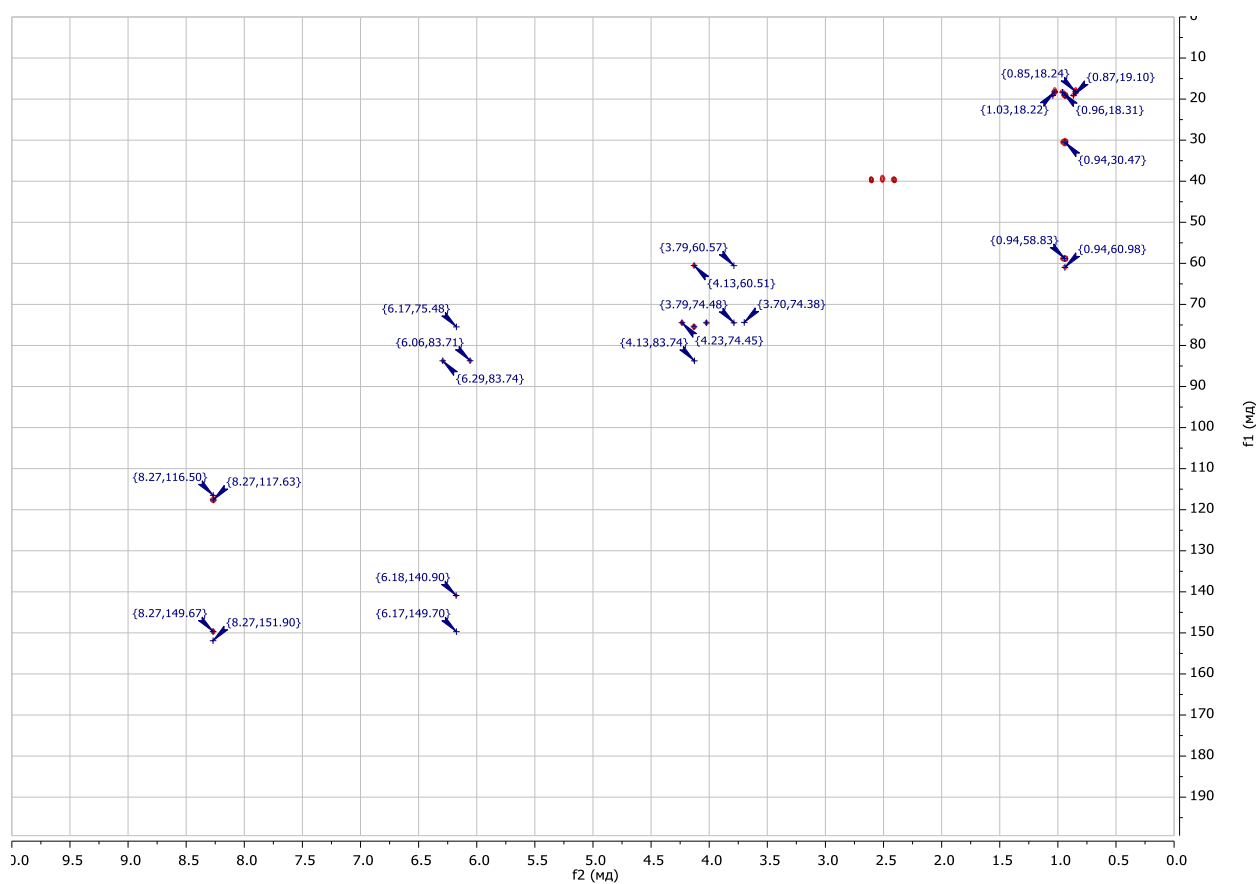

**Figure SI-16.** The  $^{13}\text{C}$  HMBC NMR spectrum of 9- $\beta$ -D-arabinofuranosyl-2-chloro-6-( $\text{N}^{\alpha}$ -L-valinylamido)-purine (**3b**)

BT

Project Name: TESTLast\_1  
Reported by User: System

Breeze

## SAMPLE INFORMATION

Sample Name: **3b**  
Sample Type: Unknown  
Vial: 1  
Injection #: 1  
Injection Volume: 7,50 µl  
Run Time: 20,00 Minutes  
Column Type:

Acquired By: System  
Date Acquired: 29.04.2014 13:56:04  
Acq. Method: 100B\_dual\_280  
Date Processed: 19.05.2014 12:47:21  
Channel Name: 2487Channel 2  
Sample Set Name:

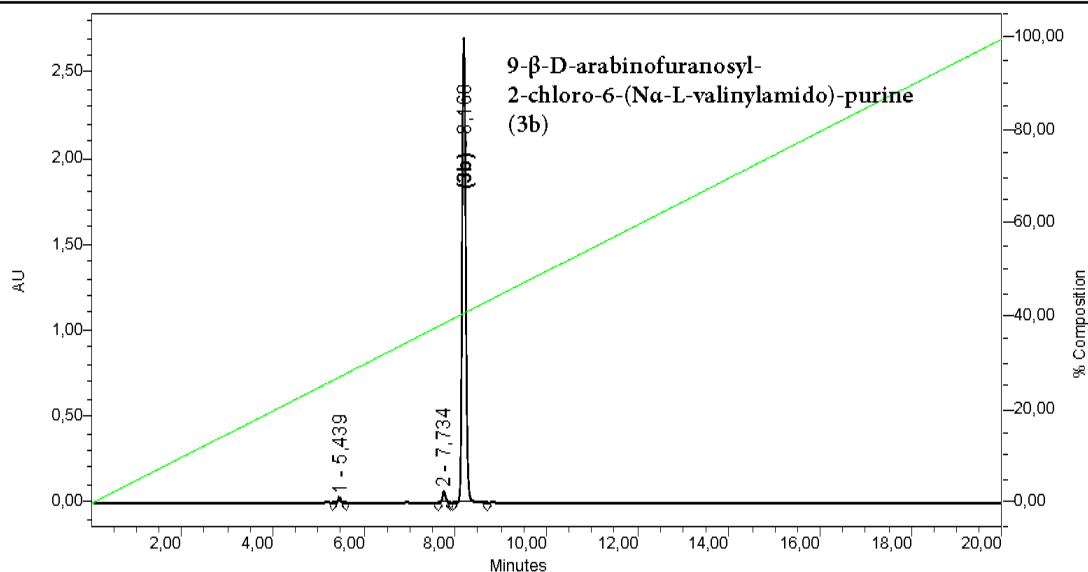

|   | Peak Name | RT (min) | Area (V*sec) | % Area | Height (V) | % Height |
|---|-----------|----------|--------------|--------|------------|----------|
| 1 | 1         | 5,439    | 142119       | 0,92   | 32728      | 1,16     |
| 2 | 2         | 7,734    | 331536       | 2,14   | 65046      | 2,30     |
| 3 | <b>3b</b> | 8,168    | 15052791     | 96,95  | 2725743    | 96,54    |

**Figure SI-17.** The chromatogram of **3b**

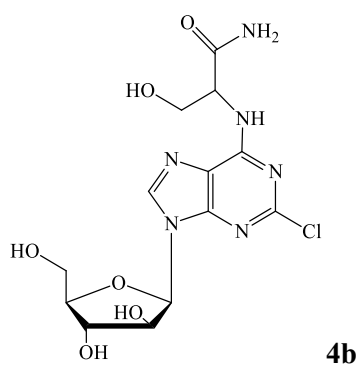

**9-β-*D*-arabinofuranosyl-2-chloro-6-(*N*<sup>α</sup>-*L*-serinylamido)-purine (4b)**

<sup>1</sup>H NMR (700 MHz, DMSO-*d*<sub>6</sub>, 30 °C): δ= 8.27 and 8.25 (2 sign., 0.84H and 0.14, H-8), 7.60 and 7.55 (br.sign, 0.18H, and br.d., *J* = 6.2 Hz, 0.82H, C6-NH), 7.47 and 7.45 (2 sign., 0.78H and 0.24H, CO-NH), 7.16 (s, 1H, CO-NH), 6.18 (d, *J* = 5.0 Hz, 1H, H-1'), 5.64 (br.sign, 1H, 2'-OH), 5.52 (br.d., *J* = 3.4 Hz, 1H, 3'-OH), 5.05 (br.sign, 1H, 5'-OH), 5.04 and 4.93 (2 sign, 0.80H and 0.2H, OH-Ser), 4.63 (m, 0.80H, CαH) 4.18 (m, 1H, H-2'), 4.13 (m, 1H, H-3') 3.81 (m, 2H, CH<sub>2</sub>OH) 3.79 (m, 1H, H-4') 3.68 (m, 1H, H-5'a), 3.66 (m, 1H, H-5'b) ppm.

<sup>13</sup>C NMR (176 MHz, DMSO-*d*<sub>6</sub>, 30 °C): δ= 140.57 (C8), 83.79 (C4'), 83.43 (C1'), 75.21 (C2'), 74.30 (C3'), 61.30 (CH<sub>2</sub>OH), 60.33 (C5'), 55.74 (Cα) ppm.

<sup>15</sup>N NMR (71 MHz, DMSO-*d*<sub>6</sub>, 30 °C) δ= 238.71 (N7), 169.31 (N9), 104.81 (CO-NH<sub>2</sub>), 90.85 (C6-NH) ppm.

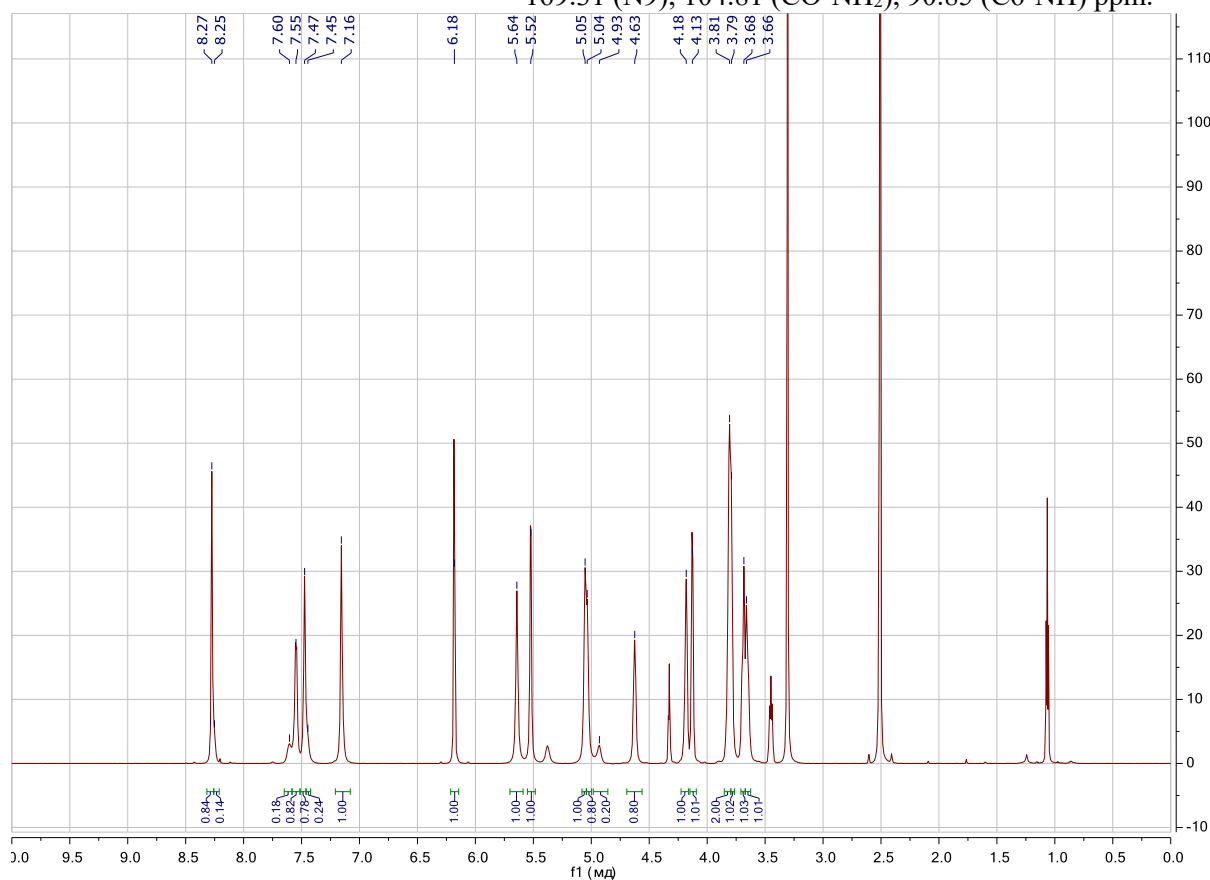

**Figure SI-18.** The <sup>1</sup>H NMR spectrum of 9-β-*D*-arabinofuranosyl-2-chloro-6-(*N*<sup>α</sup>-*L*-serinylamido)-purine (4b)

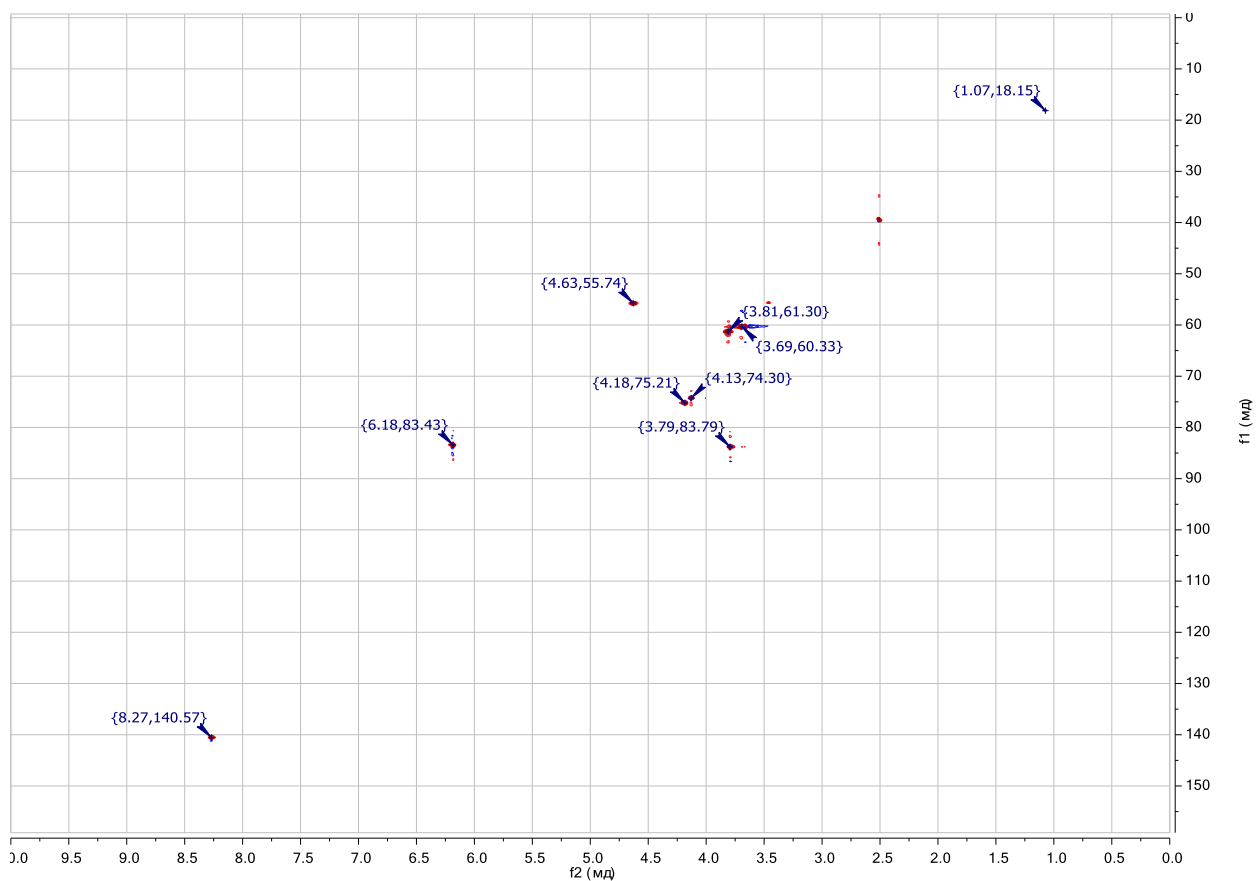

**Figure SI-19.** The  $^{13}\text{C}$  HSQC NMR spectrum of 9- $\beta$ -D-arabinofuranosyl-2-chloro-6-( $\text{N}^{\alpha}$ -L-serinylamido)-purine (**4b**)

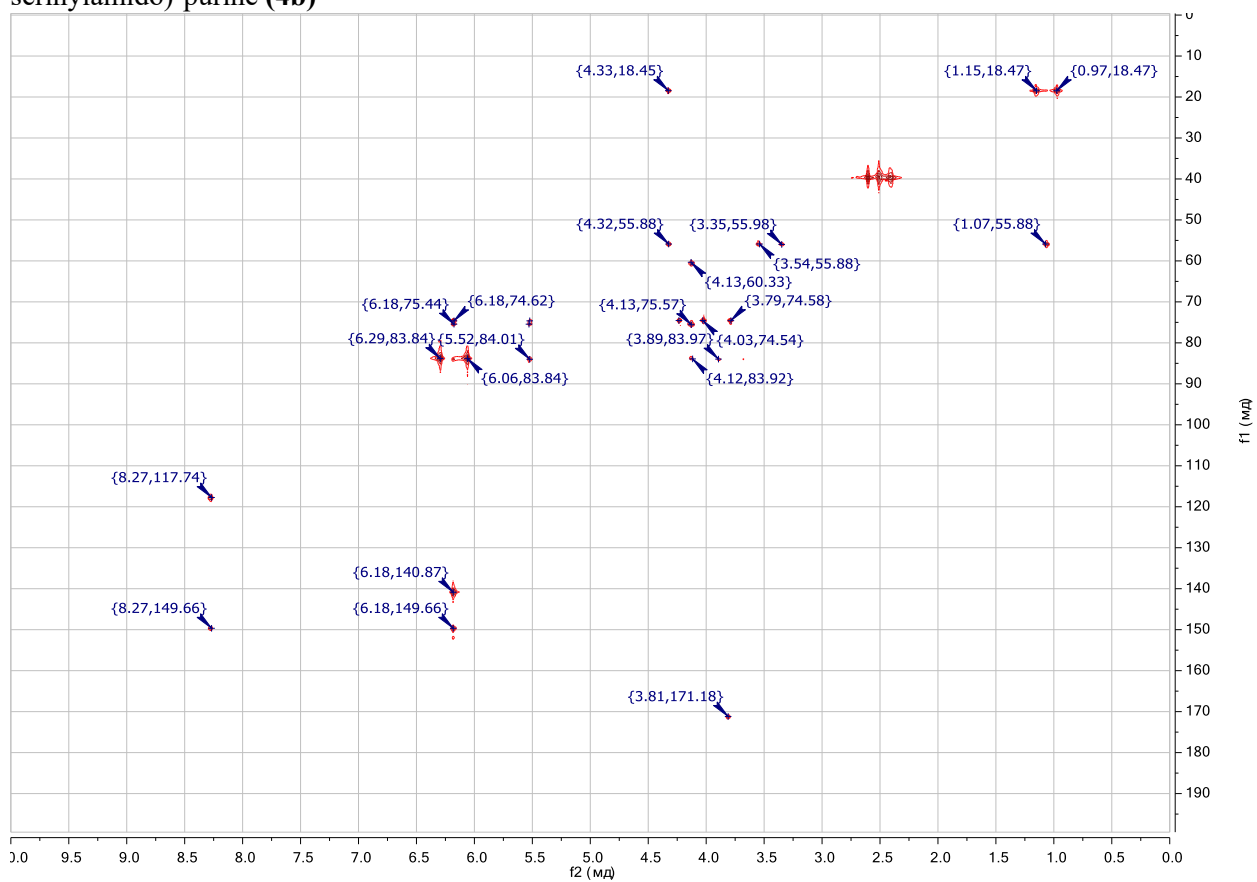

**Figure SI-20.** The  $^{13}\text{C}$  HMBC NMR spectrum of 9- $\beta$ -D-arabinofuranosyl-2-chloro-6-( $\text{N}^{\alpha}$ -L-serinylamido)-purine (**4b**)

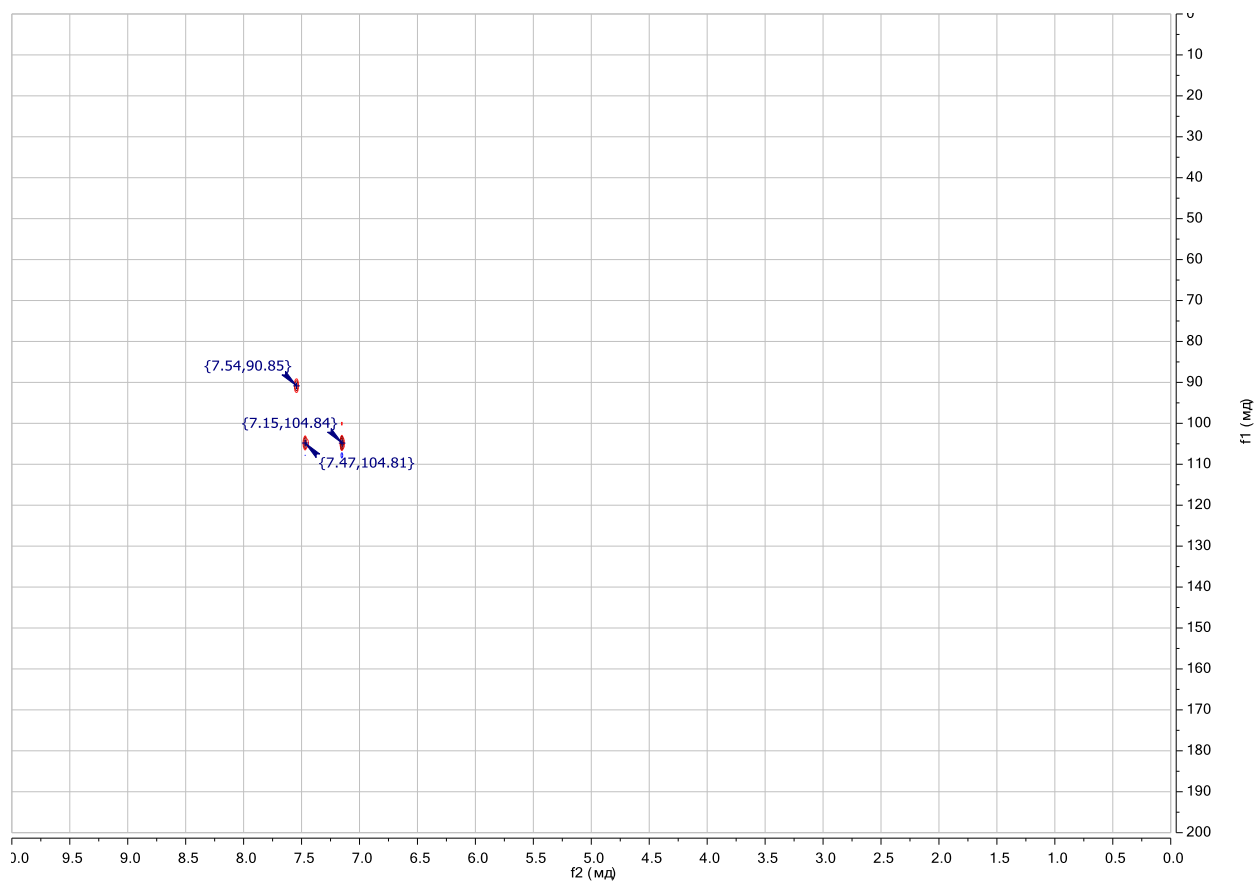

**Figure SI-21.** The  $^{15}\text{N}$  HSQC NMR spectrum of 9- $\beta$ -D-arabinofuranosyl-2-chloro-6-( $\text{N}^{\alpha}$ -L-serinylamido)-purine (**4b**)

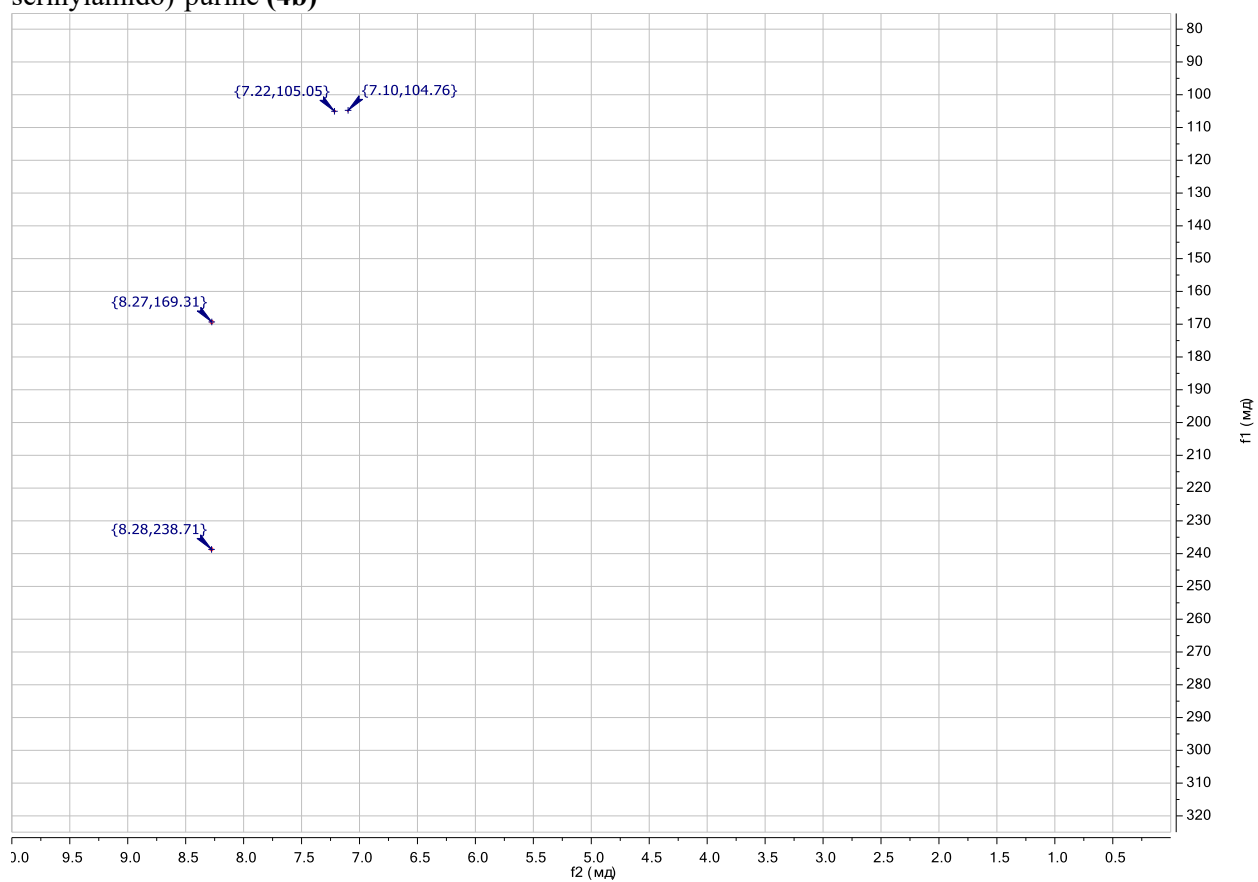

**Figure SI-22.** The  $^{15}\text{N}$  HMBC NMR spectrum of 9- $\beta$ -D-arabinofuranosyl-2-chloro-6-( $\text{N}^{\alpha}$ -L-serinylamido)-purine (**4b**)

## SAMPLE INFORMATION

Sample Name: **4b**  
 Sample Type: Unknown  
 Vial: 1  
 Injection #: 2  
 Injection Volume: 15,00 uL  
 Run Time: 20,00 Minutes  
 Column Type:

Acquired By: System  
 Date Acquired: 13.05.2013 18:18:45  
 Acq. Method: 100B\_dual\_280  
 Date Processed: 13.05.2013 19:08:08  
 Channel Name: 2487Channel 2  
 Sample Set Name:

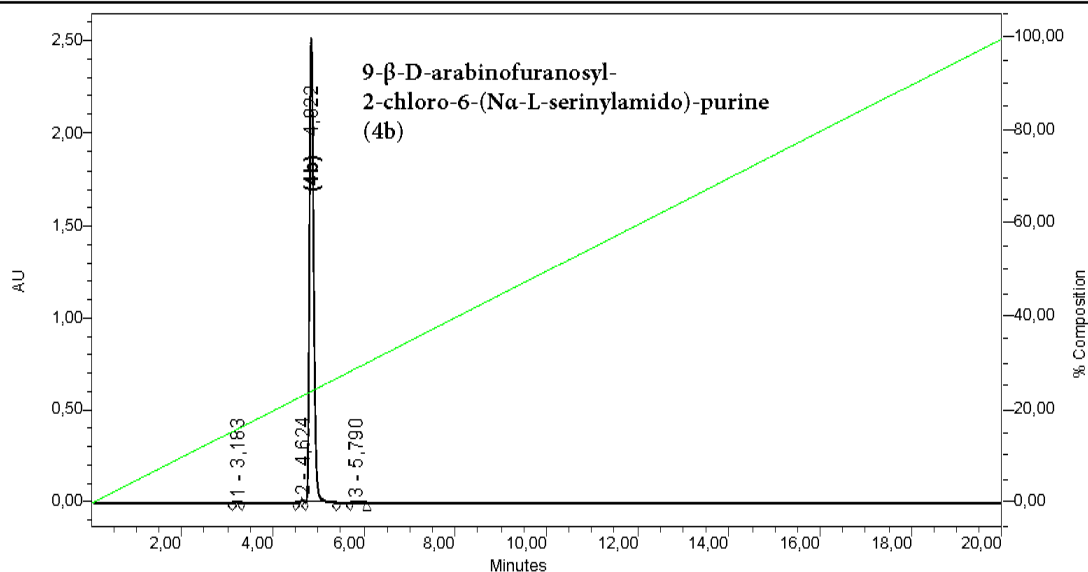

|   | Peak Name | RT (min) | Area (V*sec) | % Area | Height (V) | % Height |
|---|-----------|----------|--------------|--------|------------|----------|
| 1 | 1         | 3,183    | 15970        | 0,10   | 3406       | 0,13     |
| 2 | 2         | 4,624    | 88626        | 0,54   | 18371      | 0,71     |
| 3 | <b>4b</b> | 4,822    | 16167205     | 99,27  | 2560363    | 99,09    |
| 4 | 3         | 5,790    | 14099        | 0,09   | 1856       | 0,07     |

Figure SI-23. The chromatogram of **4b**

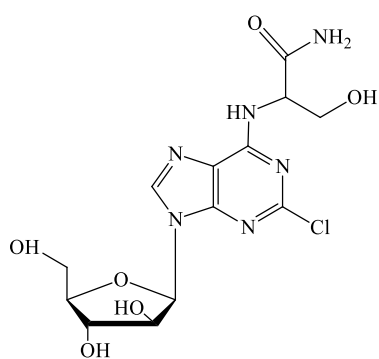

**5b**

**9-β-D-arabinofuranosyl-2-chloro-6-(N<sup>α</sup>-D-serinylamido)-purine (5b)**

<sup>1</sup>H NMR (700 MHz, DMSO-*d*<sub>6</sub>, 30 °C): δ= 8.28 and 8.25 (2 sign., 0.85H and 0.25H, H-8), 7.60 and 7.53 (2 sign., 0.05H and 0.83H, C6-NH), 7.49 and 7.14 (2br.sign, 0.88H, 0.22H, CO-NH), 7.45 and 7.18 (2 sign., 0.16 and 0.91H, CO-NH), 6.18 (d, *J* = 5.2 Hz, 1H, H-1'), 5.64 (br.sign, 1H, 2'-OH), 5.54 (br.sign, 1H, 3'-OH), 5.06 (br.sign, 1H, 5'-OH), 5.02 (br.sign, 1H, OH-Ser), 4.63 (m, 1H, CαH) 4.19 (m, 1H, H-2'), 4.13 (m, 1H, H-3') 3.80 (m, 2H, CH<sub>2</sub>OH) 3.79 (m, 1H, H-4') 3.68 (m, 1H, H-5'a), 3.66 (m, 1H, H-5'b) ppm.

<sup>13</sup>C NMR (176 MHz, DMSO-*d*<sub>6</sub>, 30 °C): δ= 171.29 (CO-NH<sub>2</sub>), 154.36 (C6), 152.59 (C2), 149.65 (C4), 140.85 (C8), 117.87 (C5), 84.00 (C4'), 83.68 (C1'), 75.48 (C2'), 74.46 (C3'), 61.56 (CH<sub>2</sub>OH), 60.54 (C5'), 55.99 (Cα) ppm.

<sup>15</sup>N NMR (71 MHz, DMSO-*d*<sub>6</sub>, 30 °C) δ= 238.70 (N7), 169.71(N9), 105.13 (CO-NH<sub>2</sub>), 90.85 (C6-NH) ppm.

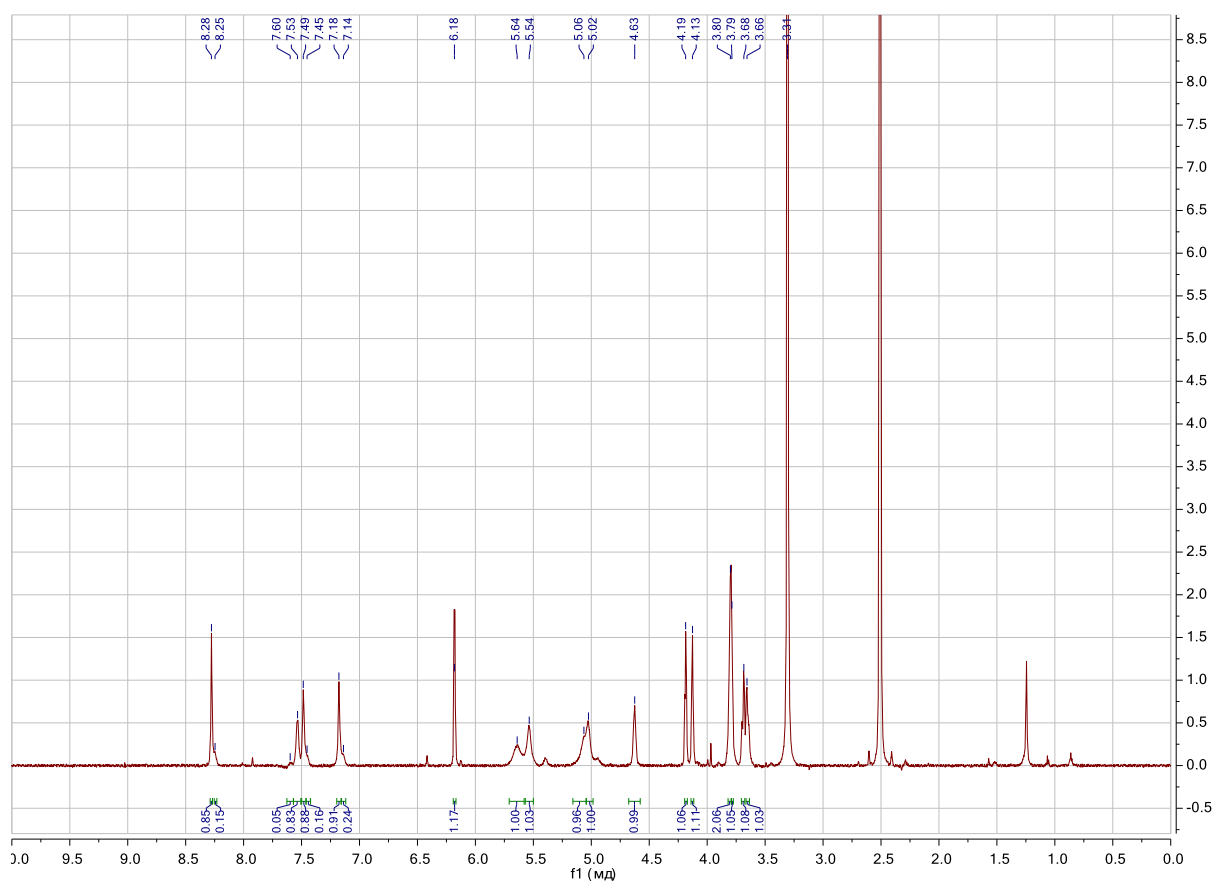

**Figure SI-24.** The <sup>1</sup>H NMR spectrum of 9-β-D-arabinofuranosyl-2-chloro-6-(N<sup>α</sup>-D-serinylamido)-purine (5b)

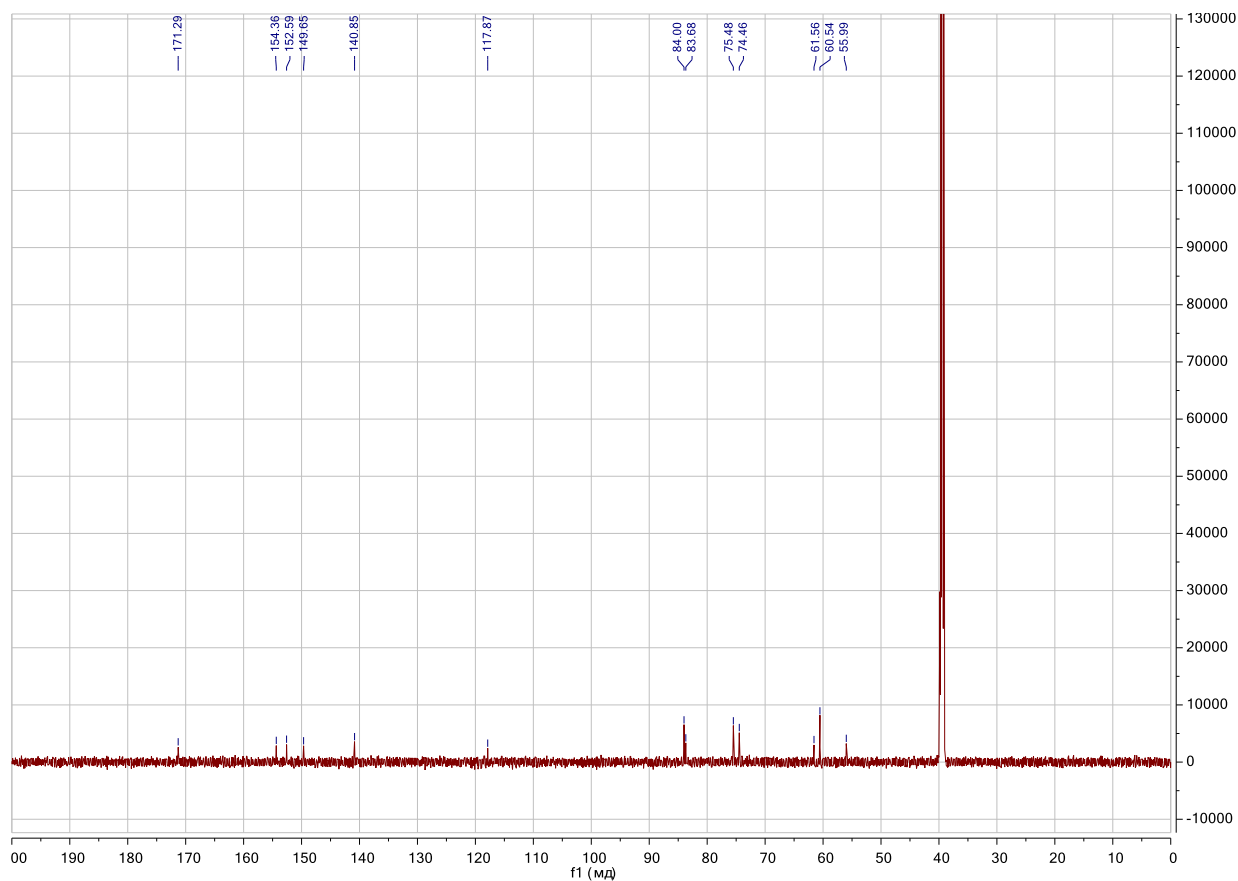

**Figure SI-25.** The  $^{13}\text{C}$  NMR spectrum of 9- $\beta$ -D-arabinofuranosyl-2-chloro-6-(N $^{\alpha}$ -D-serinylamido)-purine (**5b**)

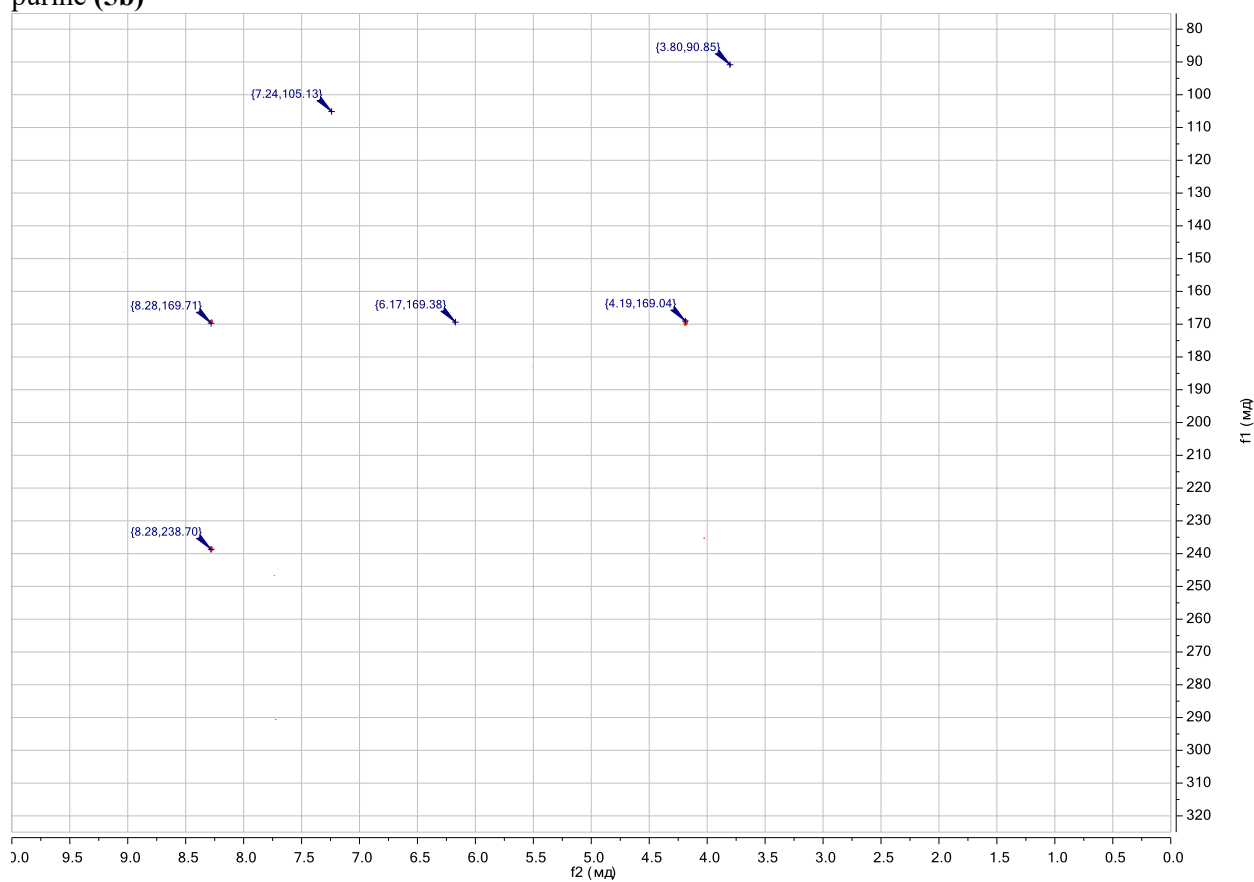

**Figure SI-26.** The  $^{15}\text{N}$  HMBC NMR spectrum of 9- $\beta$ -D-arabinofuranosyl-2-chloro-6-(N $^{\alpha}$ -D-serinylamido)-purine (**5b**)

BT

Project Name: TESTLast\_1  
Reported by User: System

Breeze

## SAMPLE INFORMATION

|                   |               |                  |                     |
|-------------------|---------------|------------------|---------------------|
| Sample Name:      | <b>5b</b>     | Acquired By:     | System              |
| Sample Type:      | Unknown       | Date Acquired:   | 29.04.2014 14:51:15 |
| Vial:             | 1             | Acq. Method:     | 100B_dual_280       |
| Injection #:      | 1             | Date Processed:  | 19.05.2014 12:46:34 |
| Injection Volume: | 7,50 ul       | Channel Name:    | 2487Channel 2       |
| Run Time:         | 20,00 Minutes | Sample Set Name: |                     |
| Column Type:      |               |                  |                     |

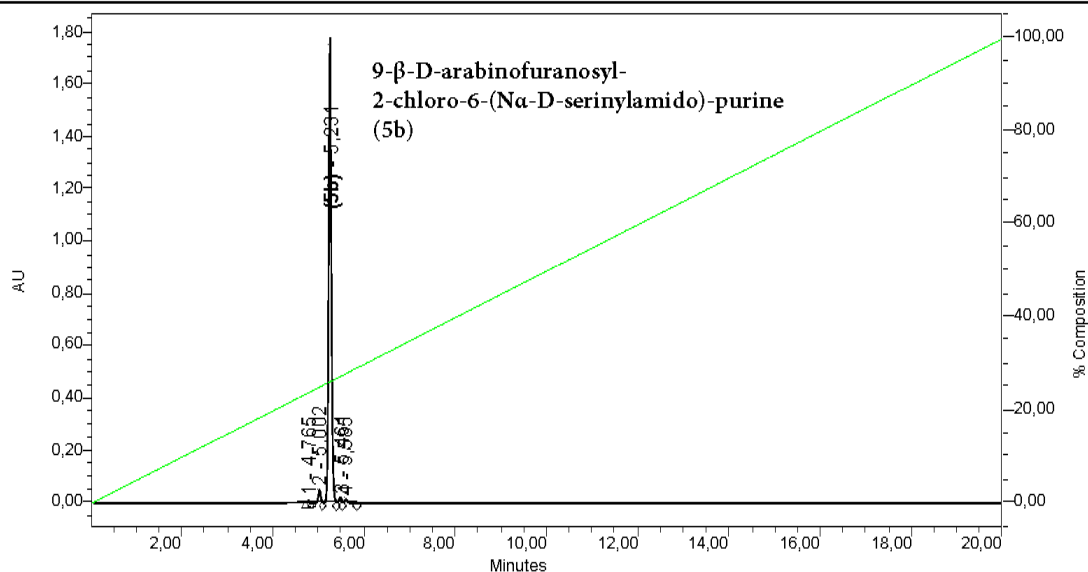

|   | Peak Name | RT (min) | Area (μV*sec) | % Area | Height (μV) | % Height |
|---|-----------|----------|---------------|--------|-------------|----------|
| 1 | 1         | 4,765    | 19107         | 0,25   | 5603        | 0,31     |
| 2 | 2         | 5,002    | 178936        | 2,37   | 44540       | 2,48     |
| 3 | <b>5b</b> | 5,231    | 7233525       | 95,69  | 1717182     | 95,58    |
| 4 | 3         | 5,461    | 75283         | 1,00   | 17226       | 0,96     |
| 5 | 4         | 5,585    | 52282         | 0,69   | 11999       | 0,67     |

Report Method: Gradient Overlay Report ASC

Printed 12:46:41

19.05.2014

Page: 1 of 1

Figure SI-27. The chromatogram of **5b**

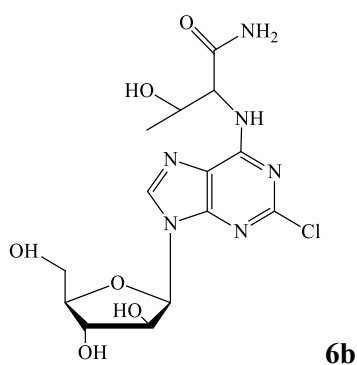

**9-β-D-arabinofuranosyl-2-chloro-6-(N<sup>α</sup>-L-threoninylamido)-purine (6b)**

<sup>1</sup>H NMR (700 MHz, DMSO-*d*<sub>6</sub>, 30 °C): δ= 8.28 and 8.26 (2 s, 0.78H and 0.22H, H-8), 7.49 and 7.43, (2 sign., 0.97H, CO-NH), 7.20 (d, *J* = 8.5 Hz, 0.78H, C6-NH) 7.13 and 7.11 (2 sign., 0.98H, CO-NH), 6.18 (d, *J* = 5.2Hz, 1H, H-1'), 5.64 (d., *J* = 5.6 Hz, 1H, 2'-OH), 5.52 (d., *J* = 5.0 Hz, 1H, 3'-OH), 5.11 (br.d, *J* = 6.0 Hz, 0.76H, OH), 5.05 (t, *J* = 5.48 Hz, 1H, 5'-OH), 4.53 (br.sign., 0.78H, NH-CH), 4.19 (m, 2H, H-2'), 4.13 (m, 1H, H-3'), 3.79 (m, 1H, H-4'), 3.68 (m, 1H, H-5'a), 3.66 (m, 1H, H-5'b), 1.13 (d, *J* = 6.6 Hz, 3H, CH<sub>3</sub>) ppm.

<sup>13</sup>C NMR (176 MHz, DMSO-*d*<sub>6</sub>, 30 °C) δ = 171.58 (CO-NH<sub>2</sub>), 154.81 (C6), 152.62 (C2), 149.64 (C4), 140.98 (C8), 117.84 (C5), 84.06 (C4'), 83.73 (C1'), 75.47 (C3'), 74.53 (C2'), 66.65 (CH-OH), 60.57 (C5'), 59.12 (NH-CH), 20.40 (CH<sub>3</sub>) ppm.

<sup>15</sup>N NMR (71 MHz, DMSO-*d*<sub>6</sub>, 30 °C) δ= 238.49 (N7), 227.23 (N1), 169.27 (N9), 105.15 (CO-NH<sub>2</sub>), 87.62 (C6-NH) ppm.

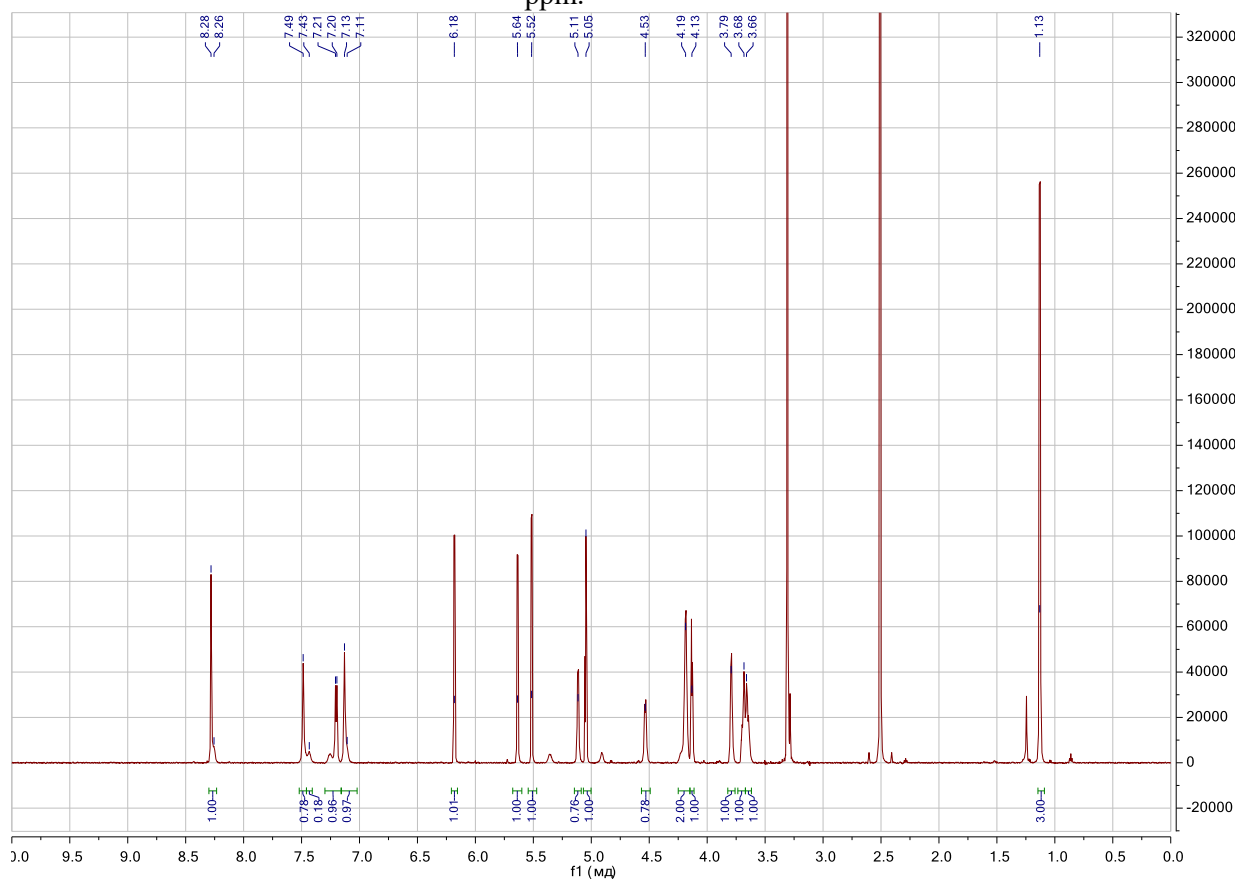

**Figure SI-28.** The <sup>1</sup>H NMR spectrum of 9-β-D-arabinofuranosyl-2-chloro-6-(N<sup>α</sup>-L-threoninylamido)-purine (6b)

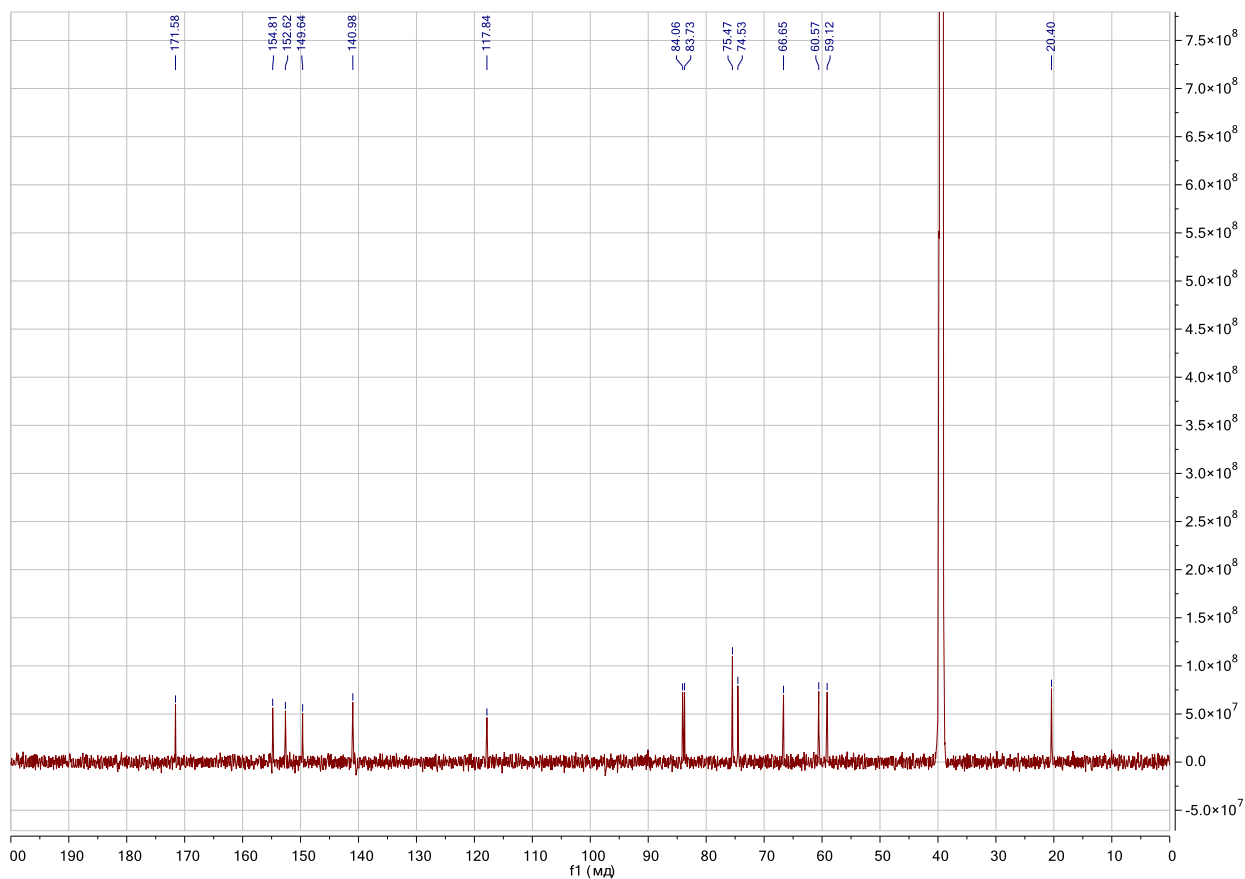

**Figure SI-29.** The  $^{13}\text{C}$  NMR spectrum of 9- $\beta$ -D-arabinofuranosyl-2-chloro-6-( $\text{N}^{\alpha}$ -L-threoninylamido)-purine (**6b**)

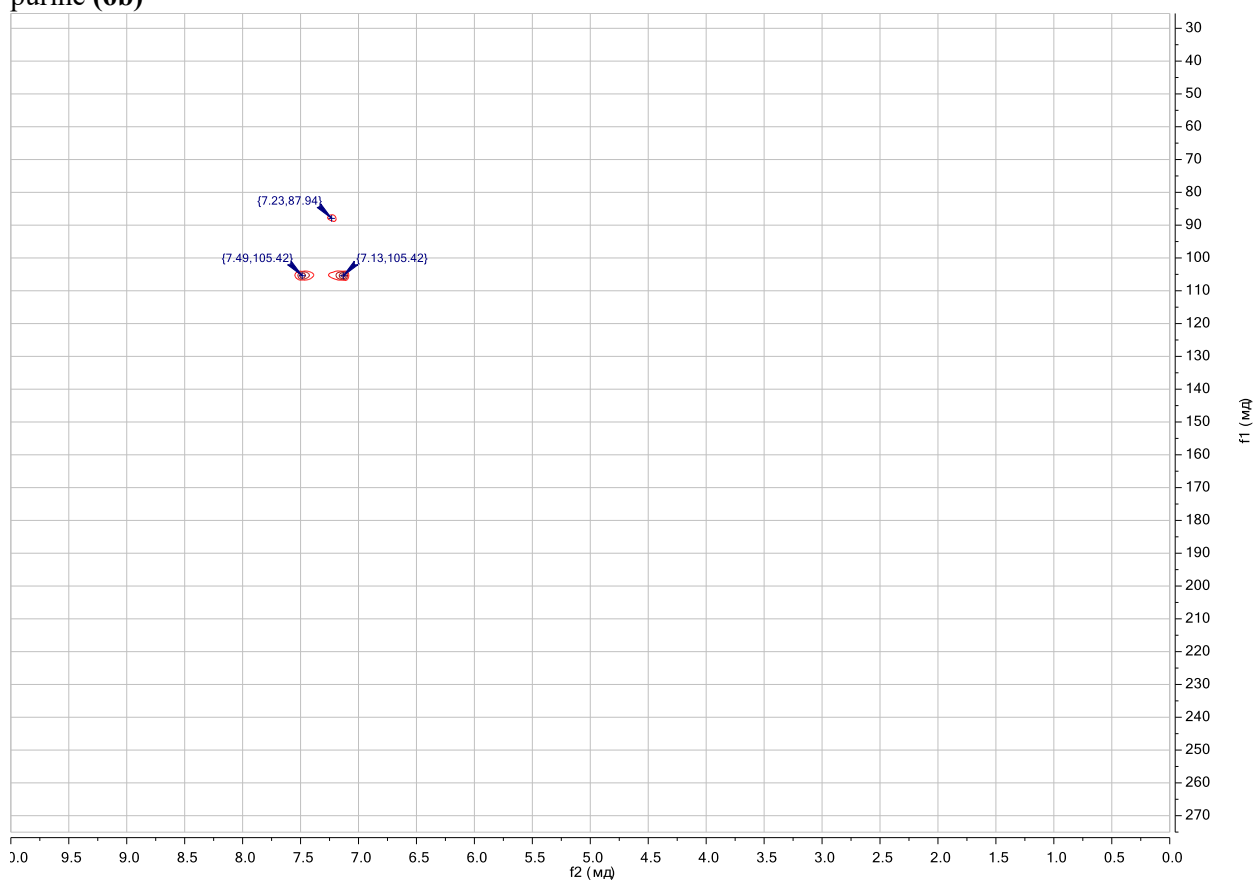

**Figure SI-30.** The  $^{15}\text{N}$  HSQC NMR spectrum of 9- $\beta$ -D-arabinofuranosyl-2-chloro-6-( $\text{N}^{\alpha}$ -L-threoninylamido)-purine (**6b**)

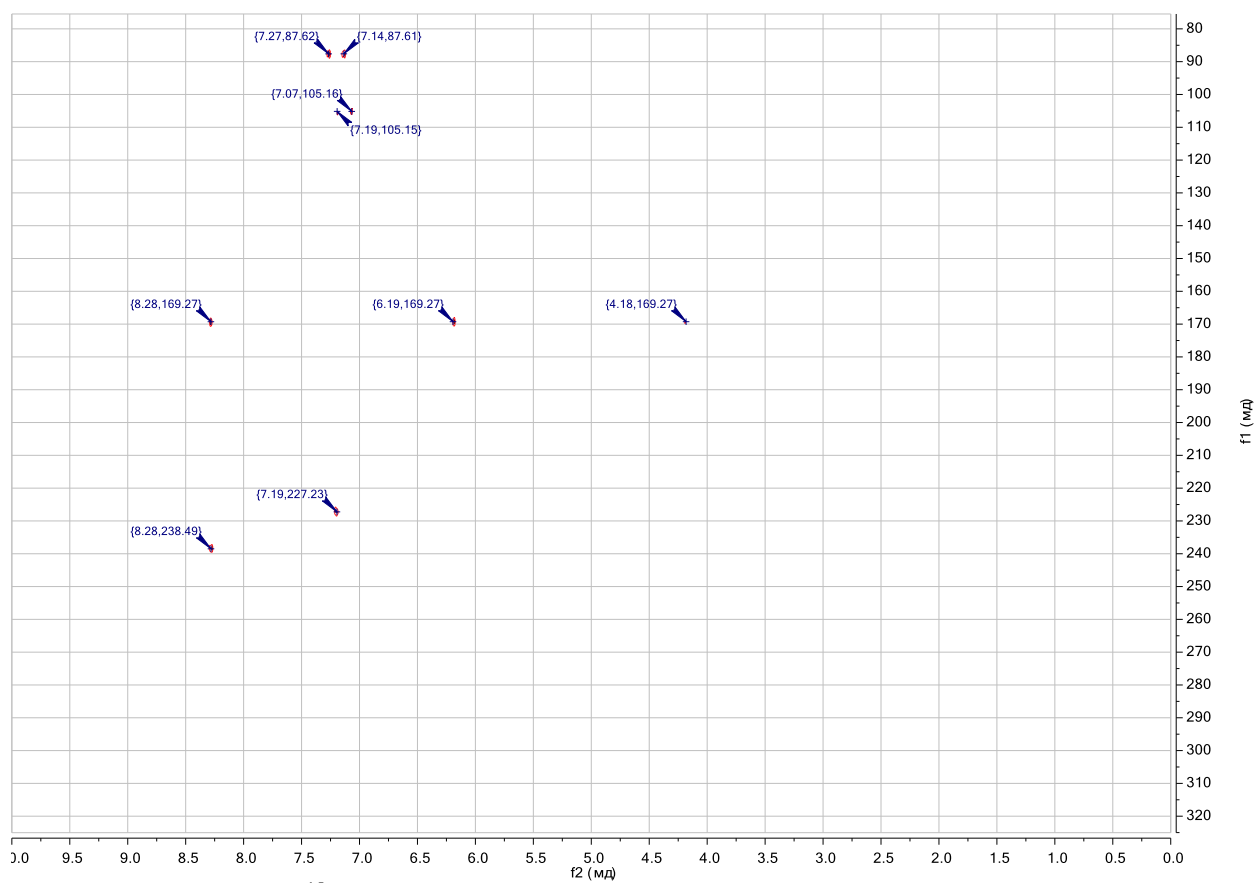

**Figure SI-31.** The  $^{15}\text{N}$  HMBC NMR spectrum of 9- $\beta$ -D-arabinofuranosyl-2-chloro-6-( $\text{N}^{\alpha}$ -L-threonylamido)-purine (**6b**)

## SAMPLE INFORMATION

|                   |               |                  |                           |
|-------------------|---------------|------------------|---------------------------|
| Sample Name:      | <b>6b</b>     | Acquired By:     | Breeze                    |
| Sample Type:      | Unknown       | Date Acquired:   | 05.12.2016 15:06:43 GMT-4 |
| Vial:             | 1             | Acq. Method:     | 100B_dual_280nm_05ml      |
| Injection #:      | 1             | Date Processed:  | 15.11.2017 15:55:11 GMT-4 |
| Injection Volume: | 10,00 ul      | Channel Name:    | W2489 ChB                 |
| Run Time:         | 20,00 Minutes | Channel Desc.:   | W2489 ChB 280nm           |
| Column Type:      |               | Sample Set Name: |                           |

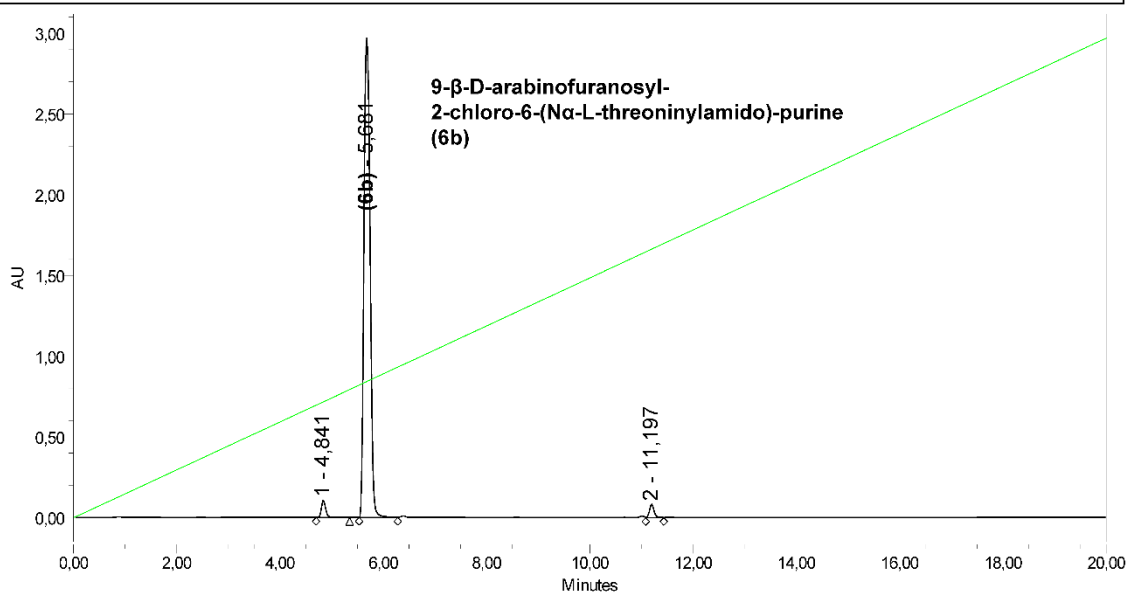

|   | Peak Name | RT (min) | Area (μV*sec) | % Area | Height (μV) | % Height |
|---|-----------|----------|---------------|--------|-------------|----------|
| 1 | 1         | 4,841    | 609045        | 2,37   | 104391      | 3,30     |
| 2 | <b>6b</b> | 5,681    | 24608261      | 95,73  | 2974371     | 94,12    |
| 3 | 2         | 11,197   | 487313        | 1,90   | 81527       | 2,58     |

Figure SI-32. The chromatogram of **6b**

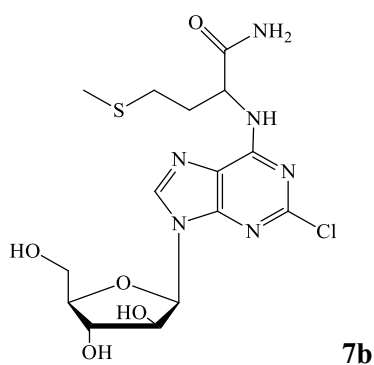

**7b**

**9-β-*D*-arabinofuranosyl-2-chloro-6-(N<sup>α</sup>-L-methioninylamido)-purine (7b)**

<sup>1</sup>H NMR (700 MHz, DMSO-*d*<sub>6</sub>, 30 °C): δ= 8.26 (s, 1H, H-8), 8.06 (br.d, 1H *J* = 7.6Hz, C6-NH), 7.45 and 7.42 (2 sign, 0.75H and 0.18H, CO-NH), 7.11 and 7.09 (2 sign, 0.72H and 0.22H, CO-NH), 6.18 (d, *J* = 5.17 Hz, 1H, H-1'), 5.63 (br.s, 1H, 2'-OH), 5.51 (d, *J* = 4.47 Hz, 1H, 2'-OH), 5.04 (br.s, 1H, 5'-OH), 4.68 (m, 0.91H, CαH), 4.18 (br.s, 1H, H-2'), 4.13 (m, 1H, H-3'), 3.79 (m, 1H, H-4'), 3.68 (m, 1H, H-5'a), 3.66 (m, 1H, H-5'b), 2.55 (m, 1H, CγHa), 2.51 (m, 1H, CγHb), 2.10 (m, 2H, CβHa and CβHb), 2.05 (m, 3H, CεH) ppm.

<sup>13</sup>C NMR (176 MHz, DMSO-*d*<sub>6</sub>, 30 °C) δ = 172.88 (CO-NH<sub>2</sub>), 154.61 (C6), 152.56 (C2), 149.70 (C4), 140.72 (C8), 117.80 (C5), 84.06 (C4'), 83.69 (C1'), 75.45 (C2'), 74.58 (C3'), 60.59 (C5'), 53.04 (Cα), 31.26 (Cβ), 29.85 (Cγ), 14.49 (Cε) ppm.

<sup>15</sup>N NMR (71 MHz, DMSO-*d*<sub>6</sub>, 30 °C) δ= 239.46 (N7), 227.84 (N1), 169.21 (N9), 104.36 (CO-NH<sub>2</sub>), 94.82 (C6-NH) ppm.

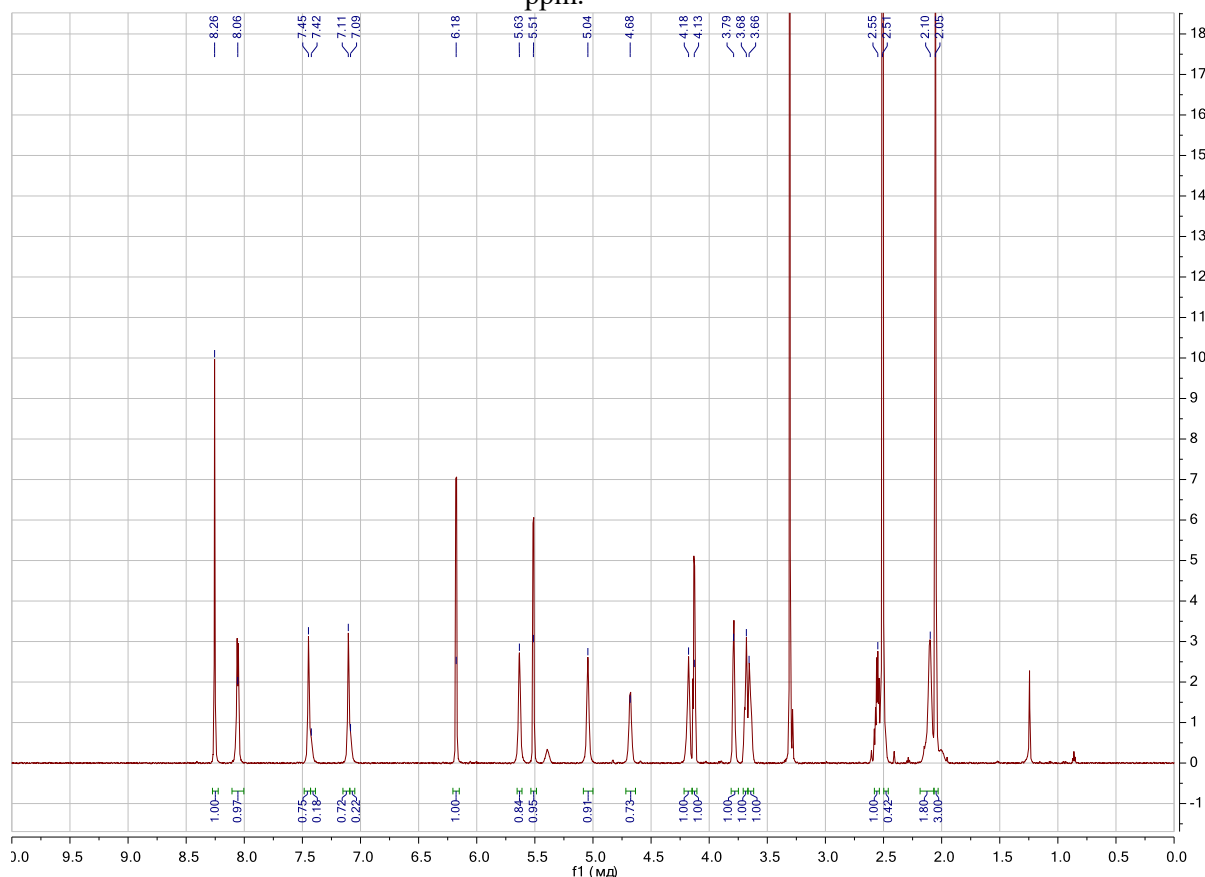

**Figure SI-33.** The <sup>1</sup>H NMR spectrum of 9-β-*D*-arabinofuranosyl-2-chloro-6-(N<sup>α</sup>-L-methioninylamido)-purine (7b)

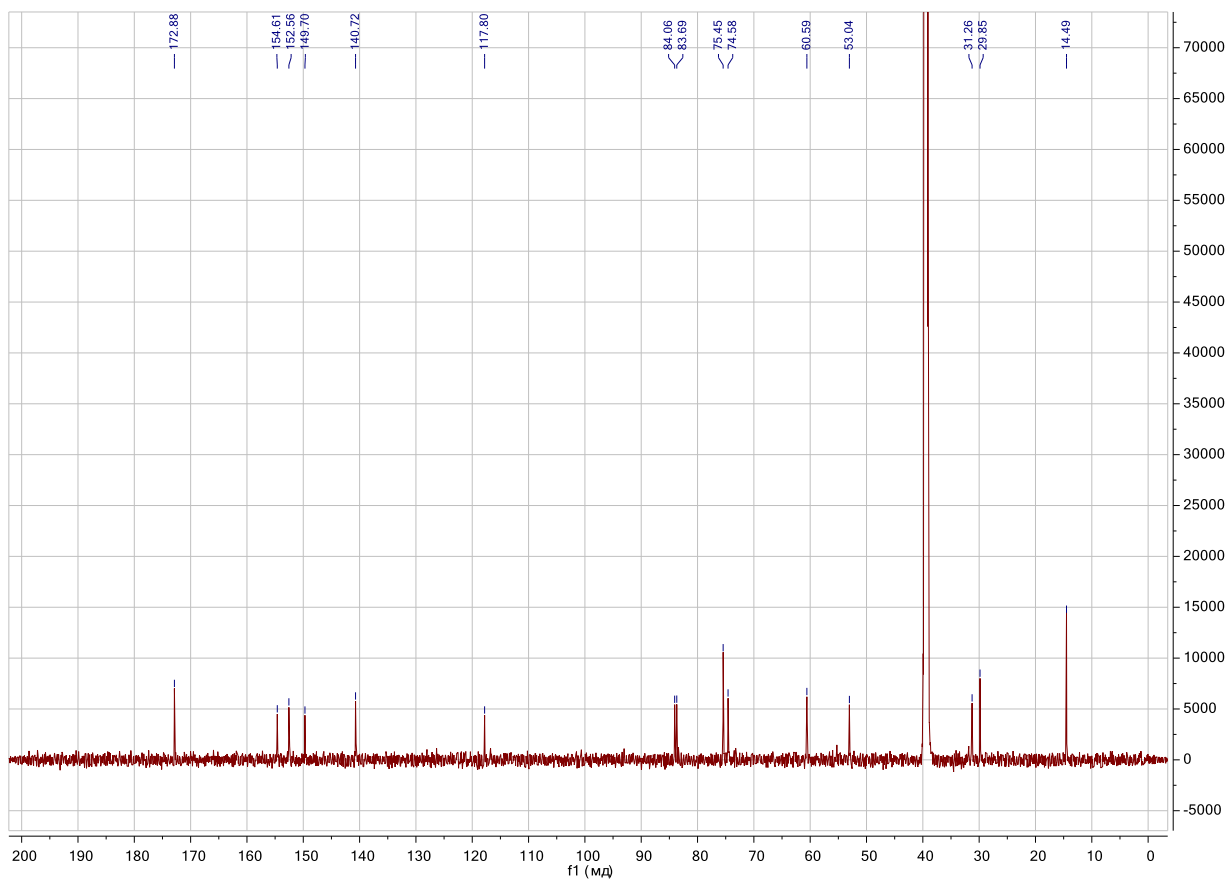

**Figure SI-34.** The  $^{13}\text{C}$  HSQC NMR spectrum of 9- $\beta$ -D-arabinofuranosyl-2-chloro-6-( $\text{N}^{\alpha}$ -L-methioninylamido)-purine (**7b**)

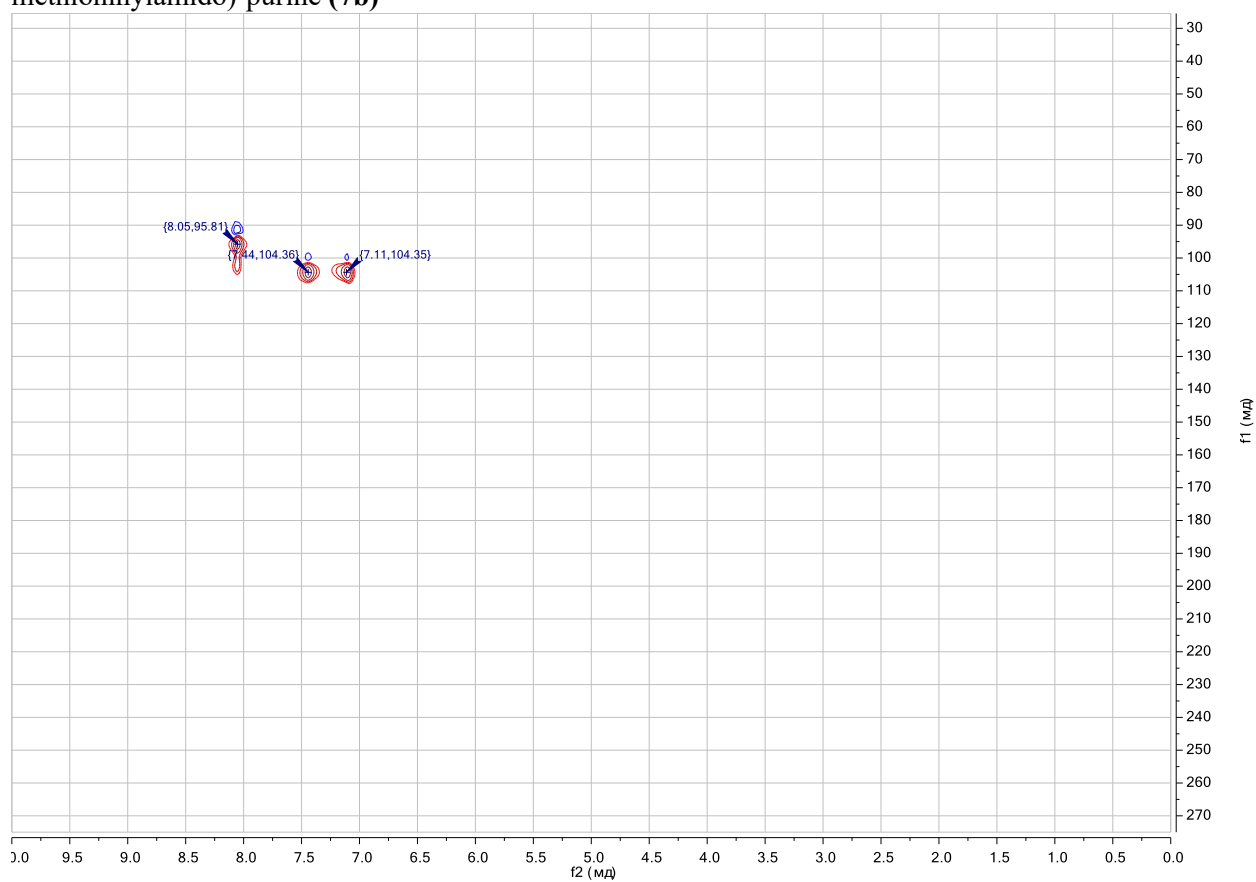

**Figure SI-35.** The  $^{15}\text{N}$  HMBC NMR spectrum of 9- $\beta$ -D-arabinofuranosyl-2-chloro-6-( $\text{N}^{\alpha}$ -L-methioninylamido)-purine (**7b**)

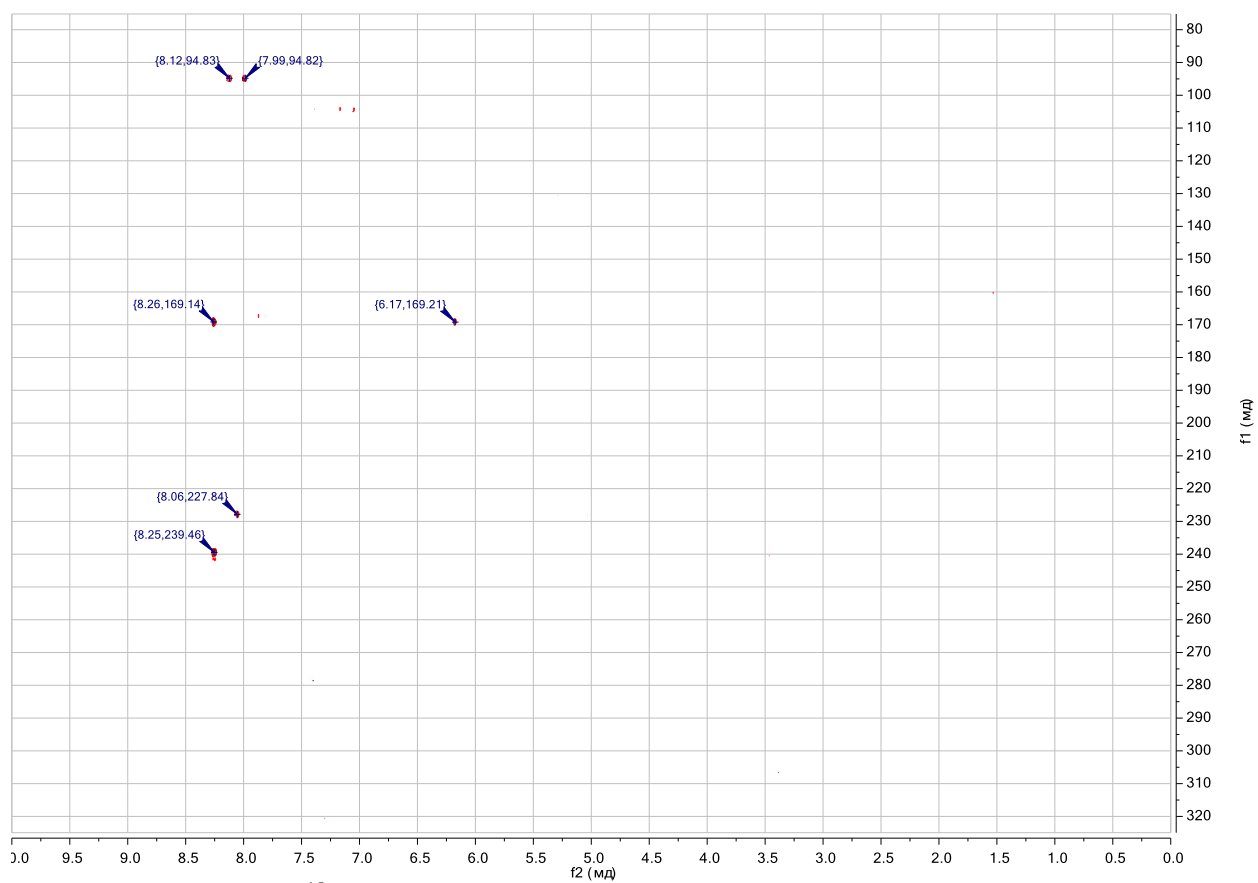

**Figure SI-36.** The  $^{15}\text{N}$  HMBC NMR spectrum of 9- $\beta$ -D-arabinofuranosyl-2-chloro-6-( $\text{N}^\alpha$ -L-methioninylamido)-purine (**7b**)

## SAMPLE INFORMATION

|                   |               |                  |                           |
|-------------------|---------------|------------------|---------------------------|
| Sample Name:      | <b>7b</b>     | Acquired By:     | Breeze                    |
| Sample Type:      | Unknown       | Date Acquired:   | 03.06.2016 14:27:08 GMT-4 |
| Vial:             | 1             | Acq. Method:     | 100B_dual_280nm_05ml      |
| Injection #:      | 1             | Date Processed:  | 03.06.2016 14:53:37 GMT-4 |
| Injection Volume: | 5,00 µl       | Channel Name:    | W2489 ChA                 |
| Run Time:         | 20,00 Minutes | Channel Desc.:   | W2489 ChA 254nm           |
| Column Type:      |               | Sample Set Name: |                           |

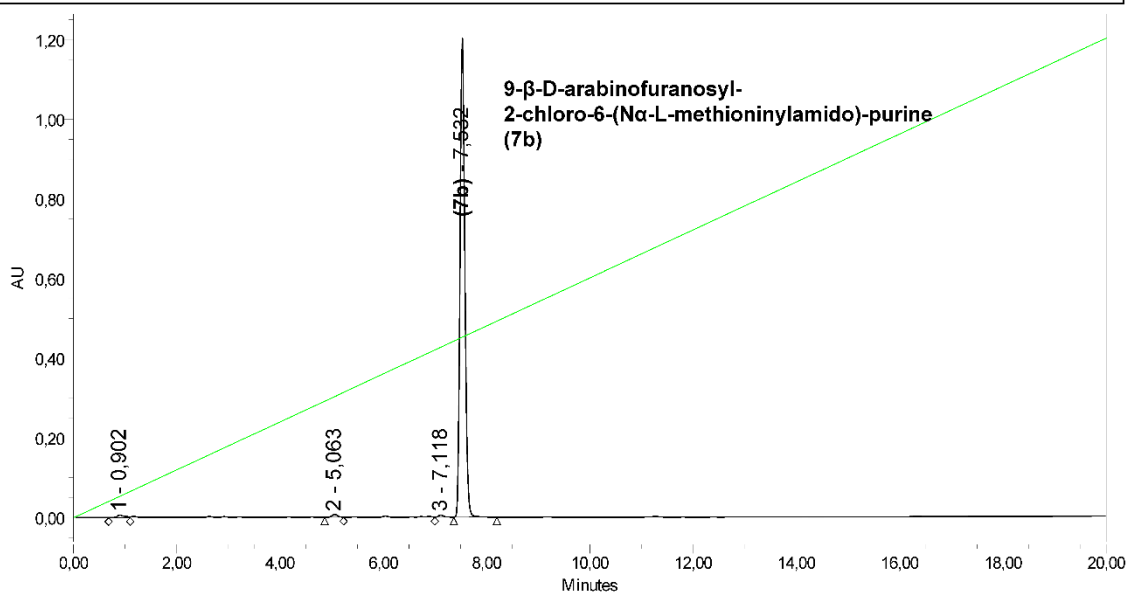

|   | Peak Name | RT (min) | Area (µV*sec) | % Area | Height (µV) | % Height |
|---|-----------|----------|---------------|--------|-------------|----------|
| 1 | 1         | 0,902    | 56890         | 0,72   | 6096        | 0,50     |
| 2 | 2         | 5,063    | 49056         | 0,62   | 6914        | 0,57     |
| 3 | 3         | 7,118    | 39132         | 0,49   | 5544        | 0,46     |
| 4 | <b>7b</b> | 7,532    | 7779279       | 98,17  | 1197225     | 98,47    |

Figure SI-37. The chromatogram of **7b**

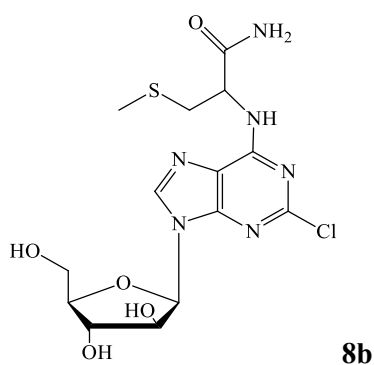

**8b**

**9-β-D-arabinofuranosyl-2-chloro-6-(N<sup>α</sup>-L-S-methylcysteinylamido)-purine (8b)**

<sup>1</sup>H NMR (700 MHz, DMSO-*d*<sub>6</sub>, 30 °C): δ = 8.27 (s, 1H, H-8), 8.05 and 7.94 (2 sign., 0.22H and 0.78H, C6-NH), 7.57 and 7.51 (2 sign., 0.74H and 0.26H, CO-NH), 7.23 (s, 1H, CO-NH), 6.18 (d, *J* = 5.2Hz, 1H, H-1'), 5.65 and 5.60 (2 br.s., 0.70H and 0.30H, 2'-OH), 5.53 (br.s., 1H, 3'-OH), 5.06 (br.s., 1H, 5'-OH), 4.81 (m, 0.8H, NH-CH), 4.19 (br.t., 1H, H-3'), 4.13 (br.t., 1H, H-2'), 3.79 (m, 1H, H-4'), 3.68 (m, 1H, H-5'a), 3.65 (m, 1H, H-5'b), 2.99 and 2.84 (2m, 1.85H and 0.15H, ), (m, 0.25H, CH<sub>2</sub>), 2.10 and 2.08 (2 s, 2.40H and 0.6H, CH<sub>3</sub>) ppm.

<sup>13</sup>C NMR (176 MHz, DMSO-*d*<sub>6</sub>, 30 °C) δ = 171.77 (CO-NH<sub>2</sub>), 154.52 (C6), 152.55 (C2), 149.78 (C4), 140.89 (C8), 117.76 (C5), 84.03 (C4'), 83.68 (C1'), 75.47 (C2'), 74.52 (C3'), 60.56, (C5'), 52.90 (NH-CH), 35.75 (CH<sub>2</sub>-S), 15.00 (S-CH<sub>3</sub>) ppm.

<sup>15</sup>N NMR (71 MHz, DMSO-*d*<sub>6</sub>, 30 °C): δ = 238.63 (N7), 227.45 (N1), 169.46 (N9), 105.74 (CO-NH<sub>2</sub>), , 95.33 (C6-NH) ppm.

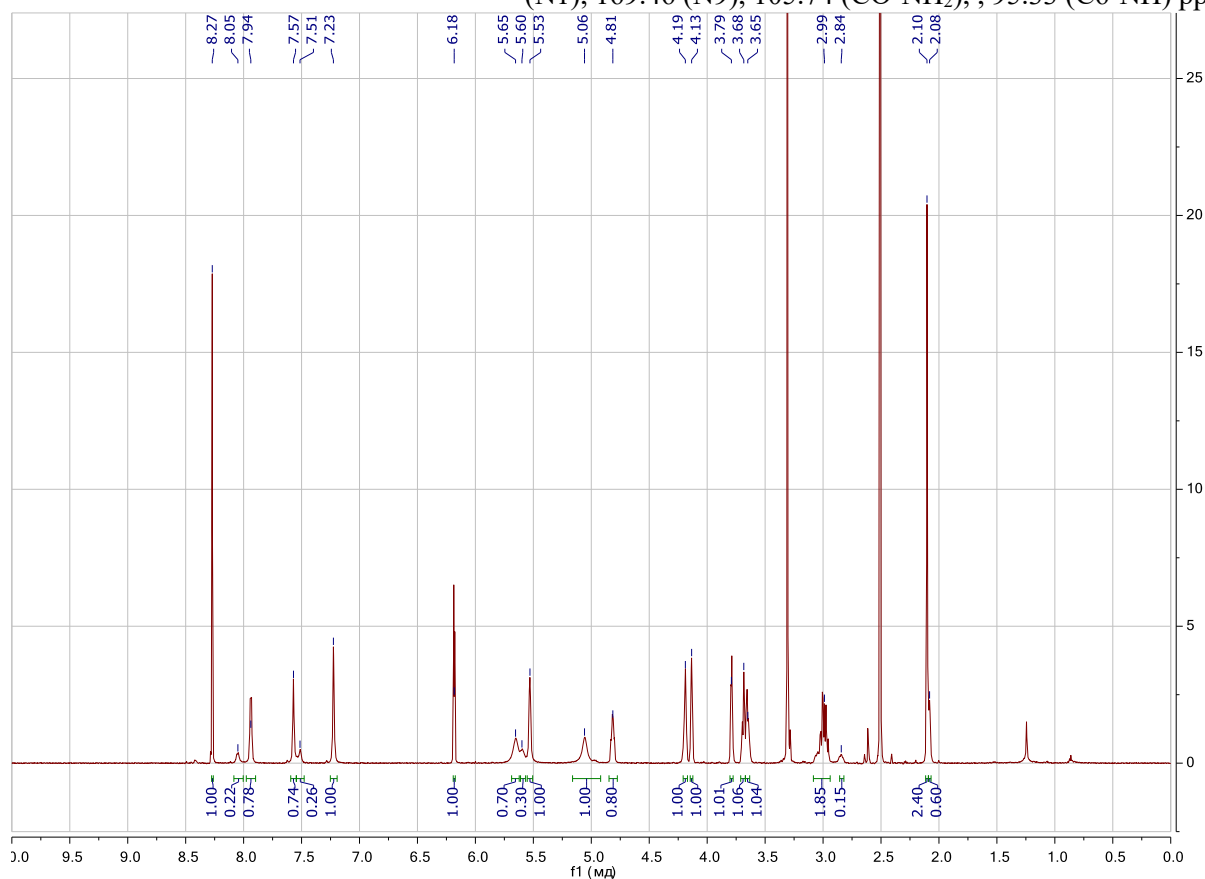

**Figure SI-38.** The <sup>1</sup>H NMR spectrum of 9-β-D-arabinofuranosyl-2-chloro-6-(N<sup>α</sup>-L-S-methylcysteinylamido)-purine (**8b**)

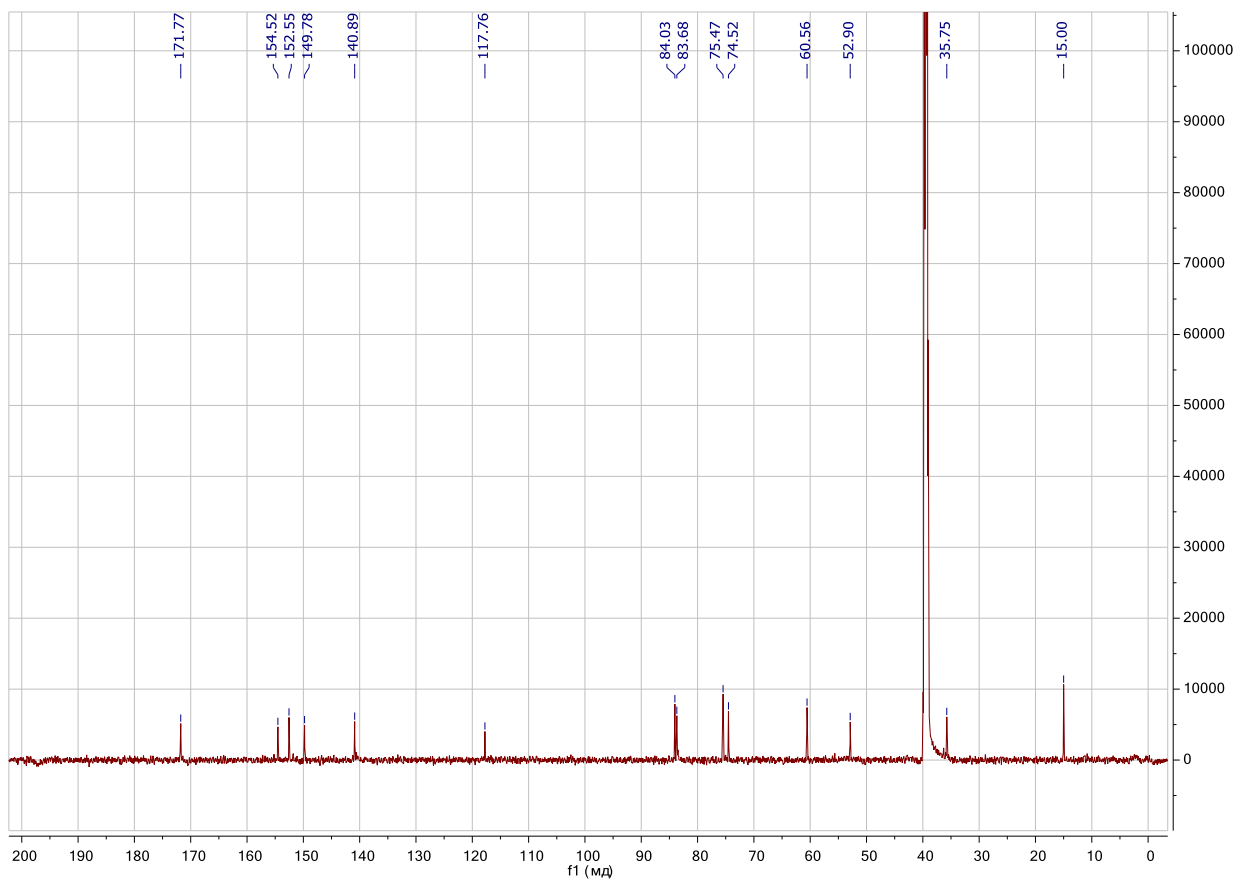

**Figure SI-39.** The  $^{13}\text{C}$  NMR spectrum of 9- $\beta$ -D-arabinofuranosyl-2-chloro-6-( $\text{N}^{\alpha}$ -L-S-methylcysteinylamido)-purine (**8b**)

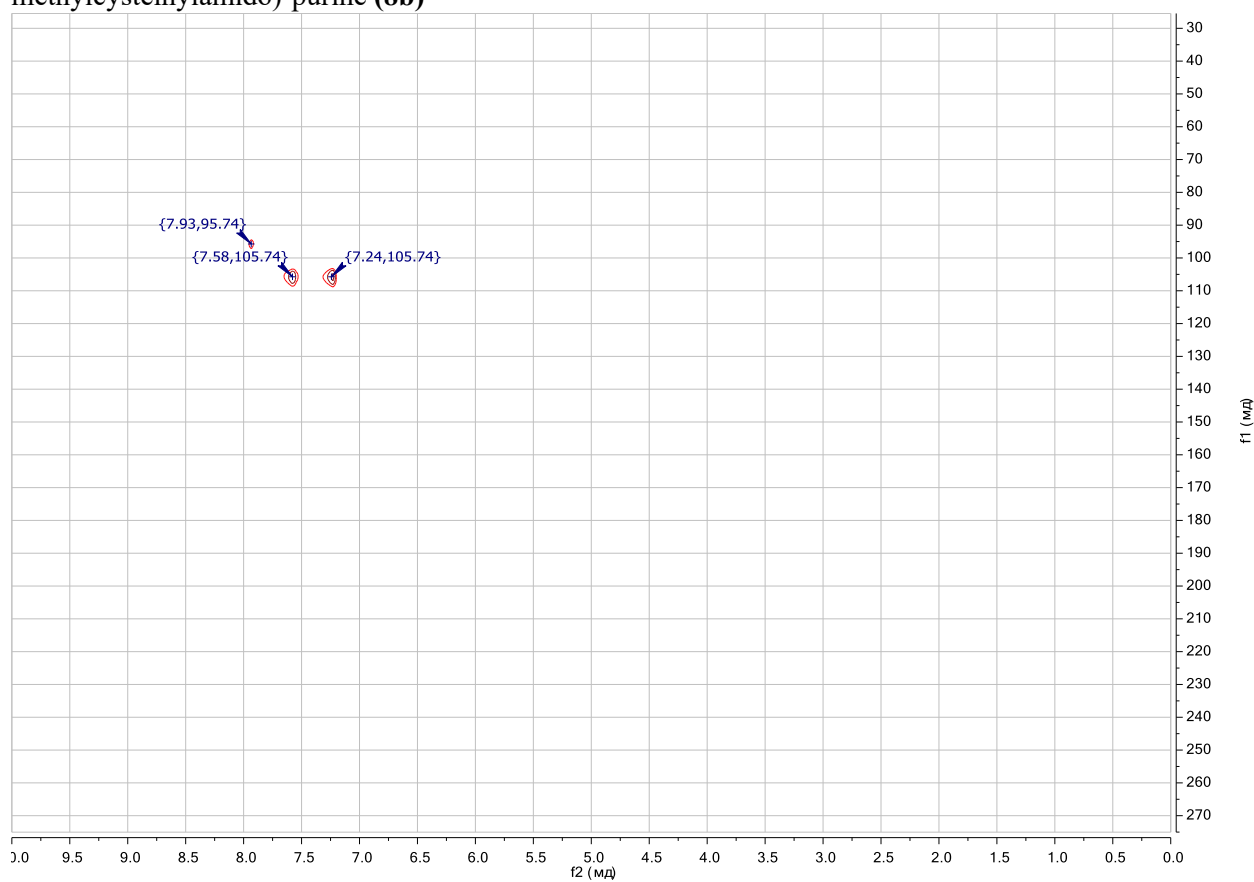

**Figure SI-40.** The  $^{15}\text{N}$  HSQC NMR spectrum of 9- $\beta$ -D-arabinofuranosyl-2-chloro-6-( $\text{N}^{\alpha}$ -L-S-methylcysteinylamido)-purine (**8b**)

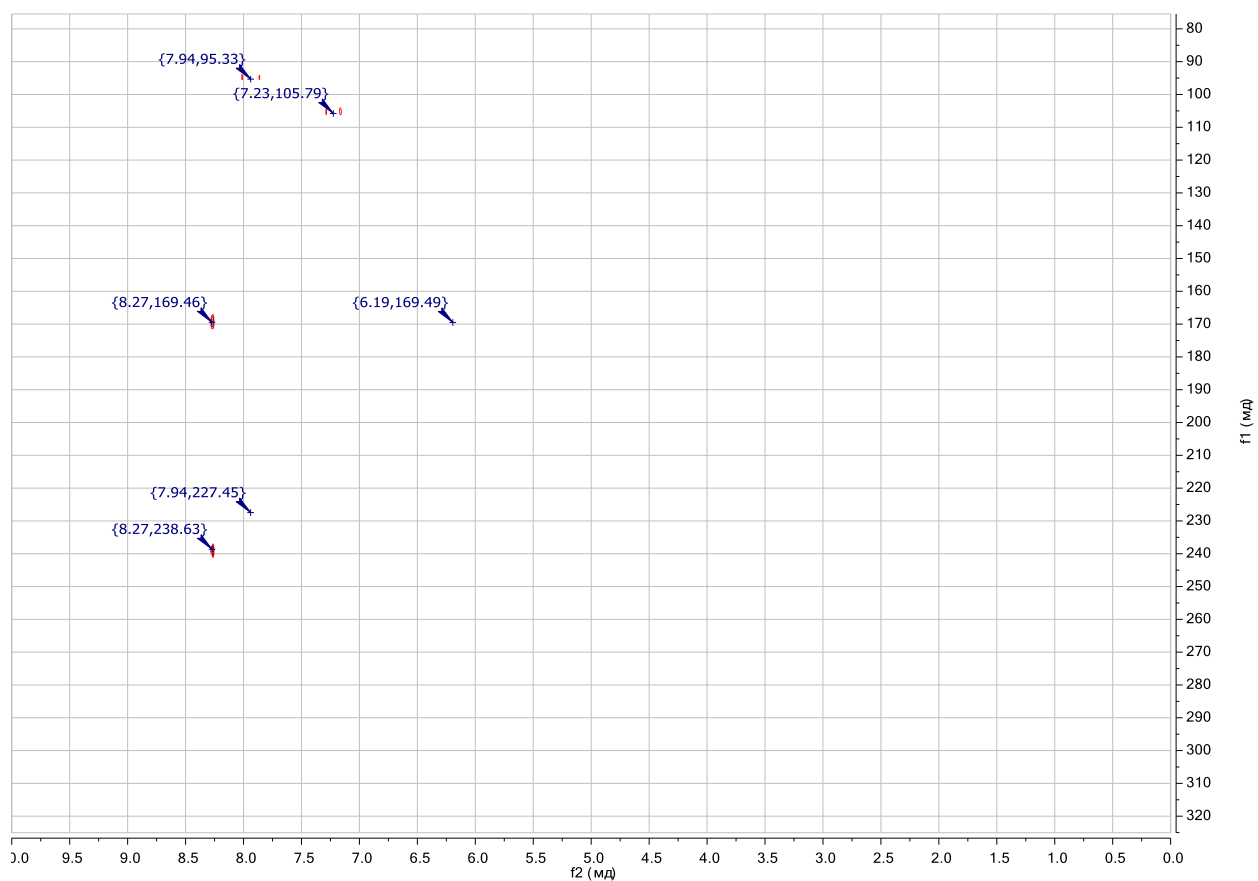

**Figure SI-41.** The  $^{15}\text{N}$  HMBC NMR spectrum of 9- $\beta$ -D-arabinofuranosyl-2-chloro-6-( $\text{N}^\alpha$ -L-S-methylcysteinylamido)-purine (**8b**)

## SAMPLE INFORMATION

|                   |               |                  |                           |
|-------------------|---------------|------------------|---------------------------|
| Sample Name:      | <b>8b</b>     | Acquired By:     | Breeze                    |
| Sample Type:      | Unknown       | Date Acquired:   | 03.06.2016 15:25:36 GMT-4 |
| Vial:             | 1             | Acq. Method:     | 100B_dual_280nm_05ml      |
| Injection #:      | 3             | Date Processed:  | 03.06.2016 15:47:12 GMT-4 |
| Injection Volume: | 5,00 $\mu$ l  | Channel Name:    | W2489 ChB                 |
| Run Time:         | 20,00 Minutes | Channel Desc.:   | W2489 ChB 280nm           |
| Column Type:      |               | Sample Set Name: |                           |

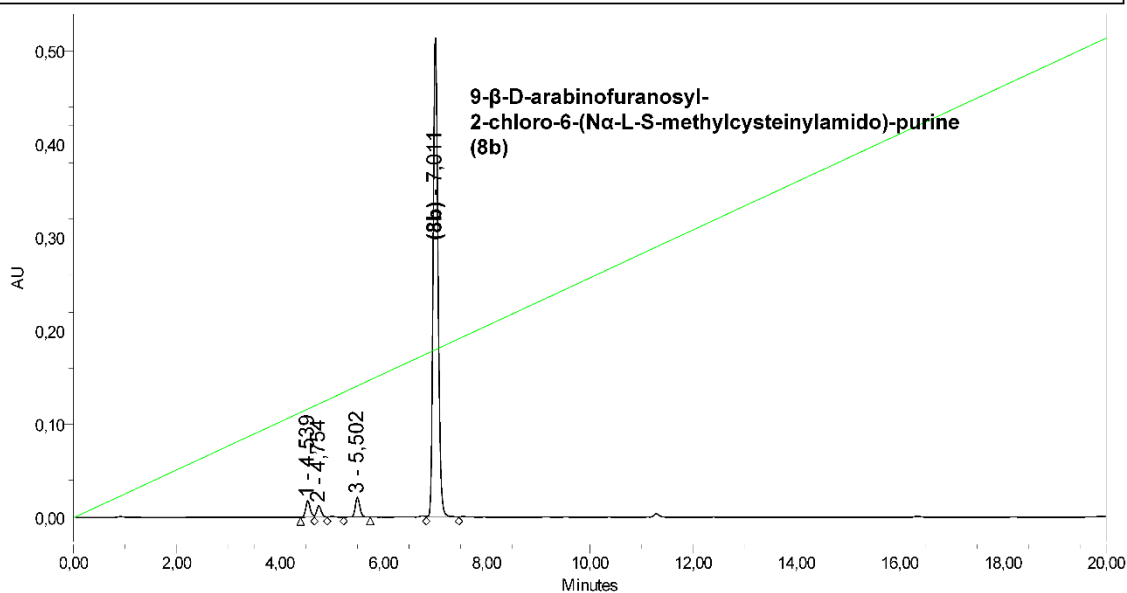

|   | Peak Name | RT (min) | Area ( $\mu$ V*sec) | % Area | Height ( $\mu$ V) | % Height |
|---|-----------|----------|---------------------|--------|-------------------|----------|
| 1 | 1         | 4,539    | 107862              | 2,94   | 17527             | 3,10     |
| 2 | 2         | 4,754    | 76401               | 2,08   | 12209             | 2,16     |
| 3 | 3         | 5,502    | 130571              | 3,56   | 21083             | 3,73     |
| 4 | <b>8b</b> | 7,011    | 3356839             | 91,43  | 514293            | 91,01    |

Figure SI-42. The chromatogram of **8b**

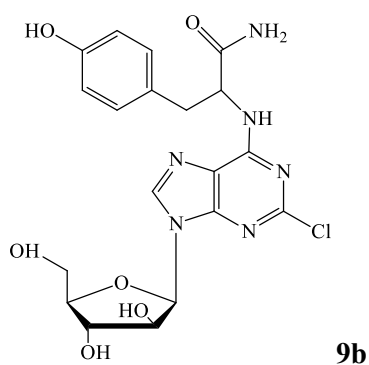

**9b**

**9-β-D-arabinofuranosyl-2-chloro-6-(N<sup>α</sup>-L-tyrosinylamido)-purine (9b)**

<sup>1</sup>H NMR (700 MHz, DMSO-*d*<sub>6</sub>, 30 °C): δ = 9.14 (s, 1H, OH), 8.40 (s, 1H, H-8), 8.04 and 7.88 (br.d, *J* = 9.6 Hz, 0.20H and d, *J* = 8.0 Hz, 0.71H, CO-NH), 7.57 and 7.50 (2 sign, 0.69H and 0.20H, CO-NH) 7.15 (br.sign, 0.69H, CO-NH) 7.12 and 7.08 (m, *J* = 8.5 Hz, *J* = 8.2 Hz, 2H, CδH), 6.62 and 6.61 (m, 2H, CεH), 5.81 (d, *J* = 6.0 Hz, 1H, H-1'), 5.47 (d, *J* = 6.14 Hz, 1H, 3'-OH), 5.18 (br.d, *J* = 5.0 Hz, 1H, 2'-OH), 5.04 (m, 1H, 5'-OH), 4.76 (m, 0.74H, CαH), 4.51 (m, 1H, H-3'), 4.34 (d, *J* = 4.22 Hz, 0.12H, ), 4.13 (m, 1H, H-2') 3.94 (m, 1H, H-4'), 3.65 (m, 1H, H-5'a), 3.55 (m, 1H, H-5'b) 3.07 (m, 0.8H, CβHa) 3.01( m, 1.2H, CβHb) ppm.

<sup>13</sup>C NMR (176 MHz, DMSO-*d*<sub>6</sub>, 30 °C) δ = 172.69 (CO-NH<sub>2</sub>), 155.66 (Cζ), 154.55 (C6), 152.71 (C2), 149.55 (C4), 140.07 (C8), 129.97 (Cδ), 127.90 (Cγ), 118.54 (C5), 114.77 (Cε), 87.36 (C1'), 85.61 (C4'), 73.56 (C3'), 70.26 (C2'), 61.23 (C5'), 55.36 (Cα), 36.27 (Cβ) ppm.

<sup>15</sup>N NMR (71 MHz, DMSO-*d*<sub>6</sub>, 30 °C): δ = 241.15 (N7), 227.65 (N1), 171.60 (N9), 104.48 (CO-NH<sub>2</sub>), 95.79 (C6-NH) ppm.

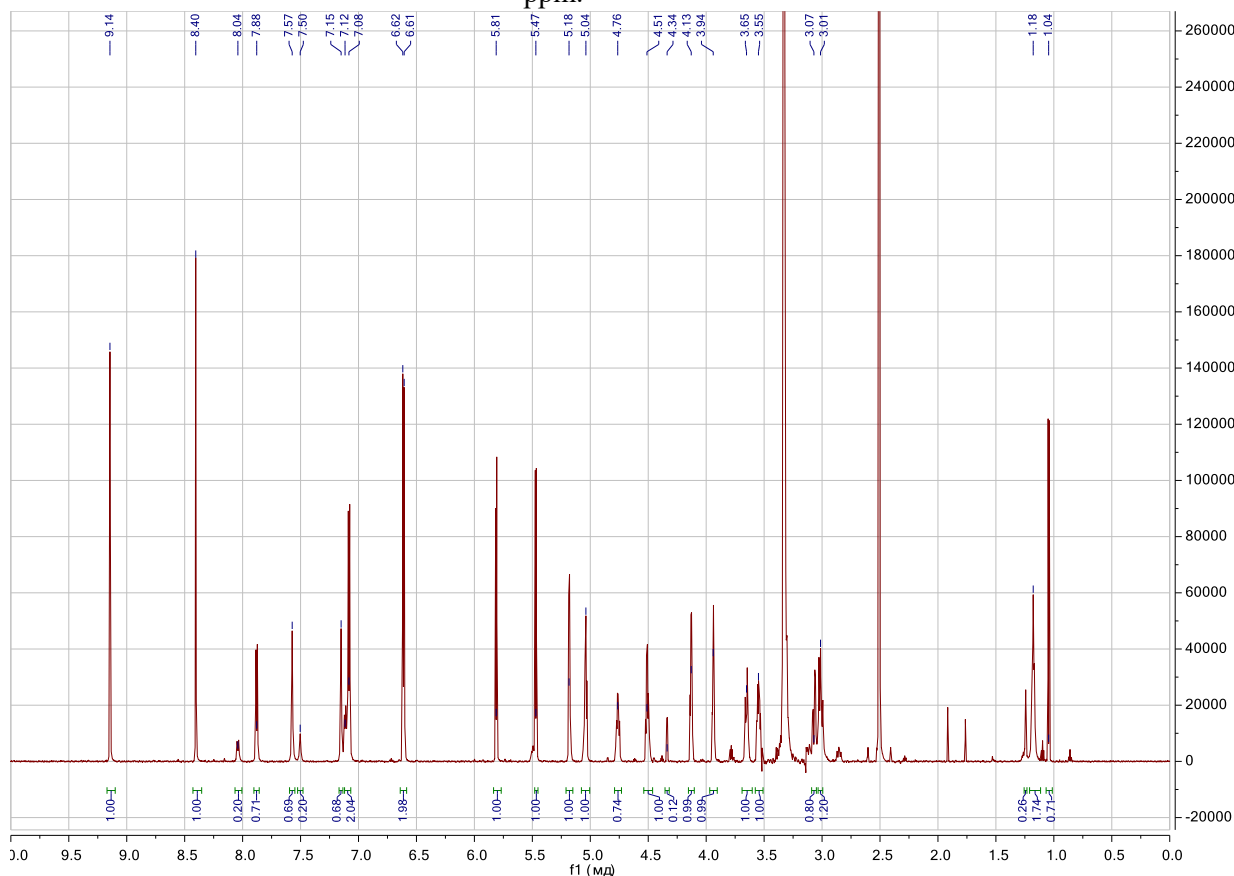

**Figure SI-43.** The <sup>1</sup>H NMR spectrum of 9-β-D-arabinofuranosyl-2-chloro-6-(N<sup>α</sup>-L-tyrosinylamido)-purine (9b)

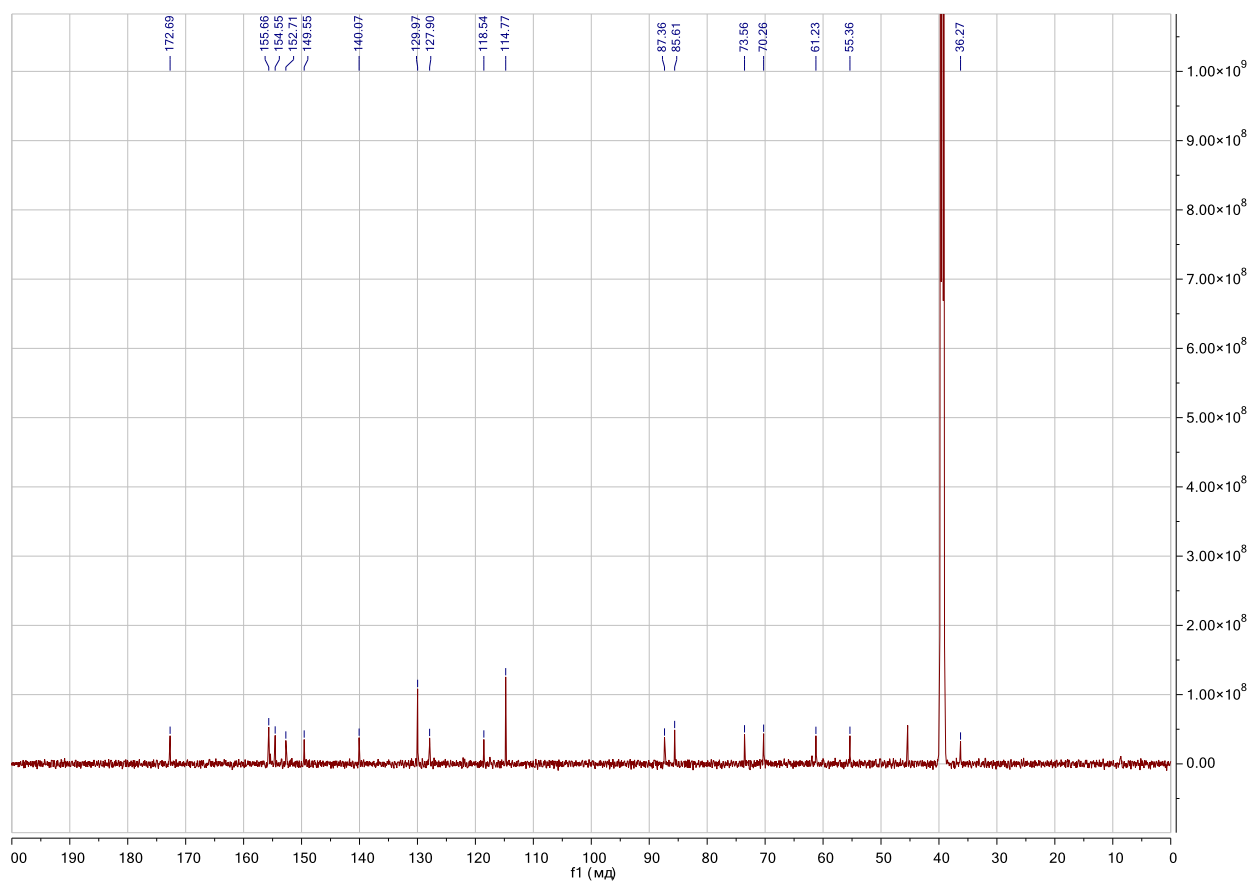

**Figure SI-44.** The  $^{13}\text{C}$  NMR spectrum of 9- $\beta$ -D-arabinofuranosyl-2-chloro-6-(N $^{\alpha}$ -L-tyrosinylamido)-purine (**9b**)

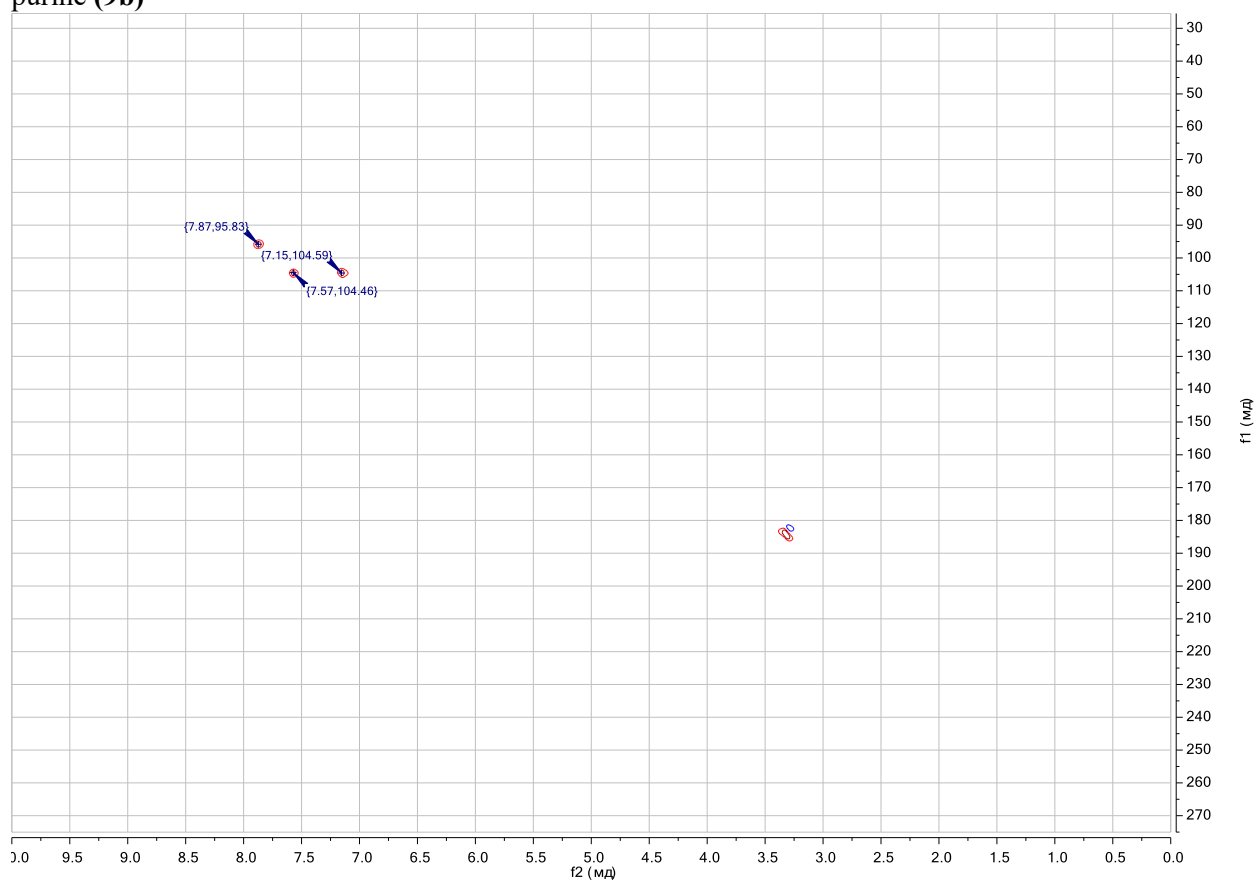

**Figure SI-45.** The  $^{15}\text{N}$  HSQC NMR spectrum of 9- $\beta$ -D-arabinofuranosyl-2-chloro-6-(N $^{\alpha}$ -L-tyrosinylamido)-purine (**9b**)

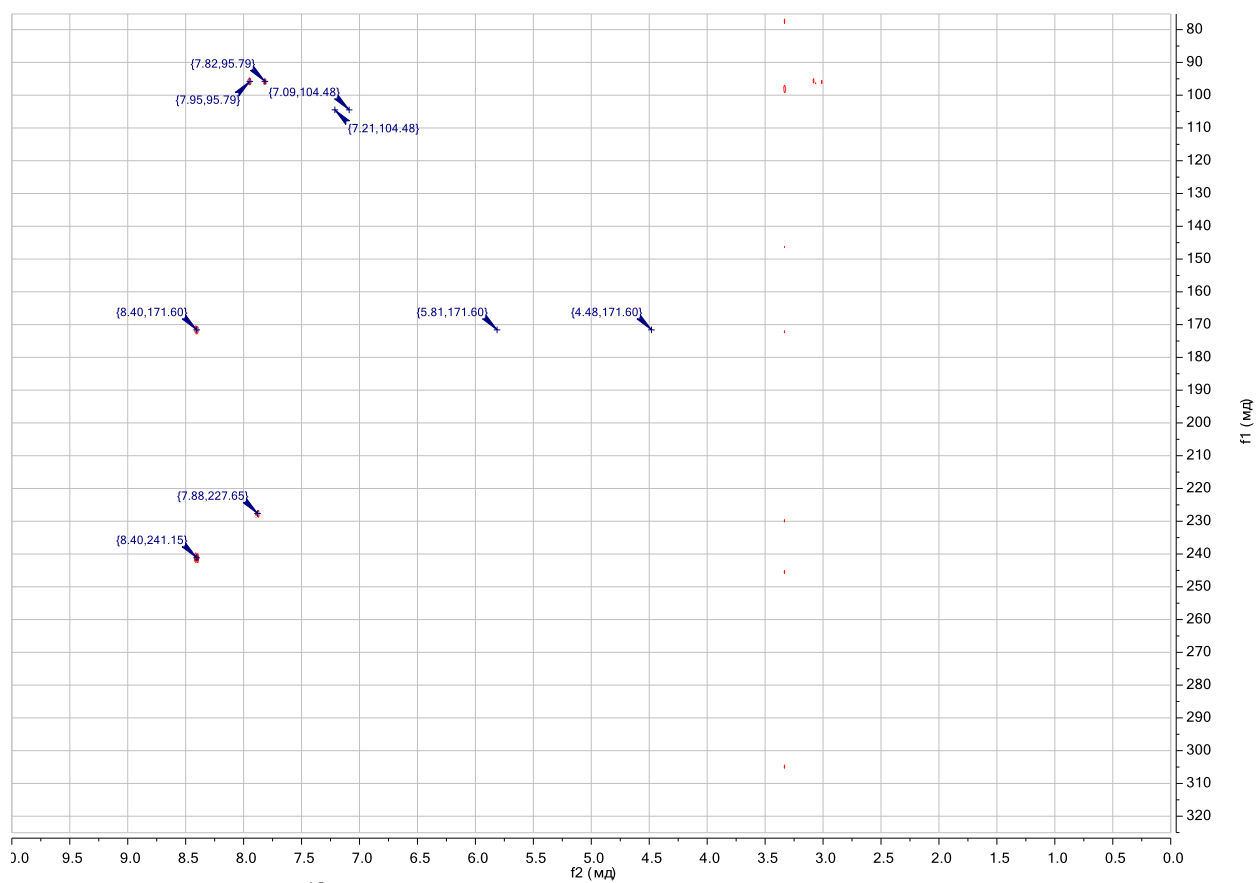

**Figure SI-46.** The  $^{15}\text{N}$  HMBC NMR spectrum of 9- $\beta$ -D-arabinofuranosyl-2-chloro-6-( $\text{N}^\alpha$ -L-tyrosinylamido)-purine (**9b**)

## SAMPLE INFORMATION

|                   |               |                  |                           |
|-------------------|---------------|------------------|---------------------------|
| Sample Name:      | <b>9b</b>     | Acquired By:     | Breeze                    |
| Sample Type:      | Unknown       | Date Acquired:   | 19.01.2017 13:21:21 GMT-4 |
| Vial:             | 1             | Acq. Method:     | 100B_dual_280nm_05ml      |
| Injection #:      | 1             | Date Processed:  | 15.11.2017 16:09:45 GMT-4 |
| Injection Volume: | 10,00 ul      | Channel Name:    | W2489 ChB                 |
| Run Time:         | 20,00 Minutes | Channel Desc.:   | W2489 ChB 280nm           |
| Column Type:      |               | Sample Set Name: |                           |

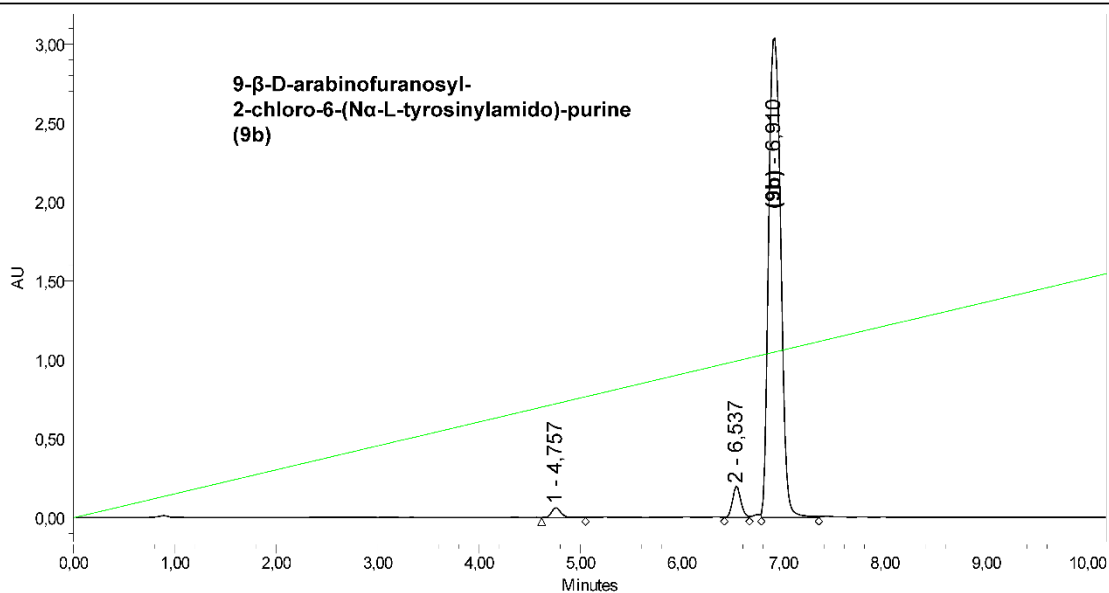

|   | Peak Name | RT (min) | Area (μV*sec) | % Area | Height (μV) | % Height |
|---|-----------|----------|---------------|--------|-------------|----------|
| 1 | 1         | 4,757    | 387879        | 1,44   | 61277       | 1,85     |
| 2 | 2         | 6,537    | 1121292       | 4,17   | 197253      | 5,96     |
| 3 | <b>9b</b> | 6,910    | 25367263      | 94,38  | 3053608     | 92,19    |

Figure SI-47. The chromatogram of **9b**

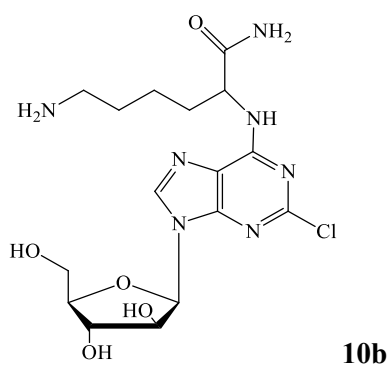

**9-β-D-arabinofuranosyl-2-chloro-6-(N<sup>α</sup>-L-lysinylamido)-purine (10b)**

<sup>1</sup>H NMR (700 MHz, DMSO-*d*<sub>6</sub>, 30 °C): δ = 8.26 (s, 1H, H-8), 7.97 and 7.88 (br.d, 0.18H and d, *J* = 8Hz, 0.72H, C6-NH), 7.61 (br.sign, 2H, Cε-NH<sub>2</sub>), 7.46 and 7.39 (2 br.sign, 0.80H and 0.20H, CO-NH), 7.12 and 7.07 (2 br.sign, 0.78H and 0.22H, CO-NH), 6.17 (d, *J* = 5.1Hz, 1H, H-1'), 5.67 and 5.65 (br.sign, 0.2H, and d, *J* = 5.5 Hz, 0.73H, 2'-OH), 5.52 (d, *J* = 4.8Hz, 0.91H, 3'-OH), 5.09 and 5.03 (br.sign, 0.20H, and t, *J* = 5.2Hz, 0.75H, 5'-OH), 4.59 (br.sign, 0.81H, CαH), 4.22 and 4.18 (br.sign, 0.22H and m, 0.78H, H-2'), 4.13 (m, 1H, H-3'), 3.79 (m, 1H, H-4'), 3.69 (m, 1H, H-5'a), 3.65 (m, 1H, H-5'b), 2.81 (m, 2H, Cβ-Ha and Cβ-Hb), 1.85 and 1.74 (2 br.sign, 1.78 H and 0.22H, Cε-Ha and Cε-Hb), 1.56 (m, 2H, Cδ-Ha and Cδ-Hb), 1.40 (m, 2H, Cγ-Ha and Cγ-Hb) ppm.

<sup>13</sup>C NMR (176 MHz, DMSO-*d*<sub>6</sub>, 30 °C) δ = 173.17 (CO-NH<sub>2</sub>), 154.56 (C6), 152.63 (C2), 149.68 (C4), 140.43 (C8), 117.77 (C5), 83.9 (C1'), 83.59 (C4'), 75.24 (C2'), 74.38 (C3'), 60.33 (C5'), 53.14 (Cα), 38.37 (Cβ), 30.90 (Cε), 26.33 (Cδ), 22.08 (Cγ) ppm.

<sup>15</sup>N NMR (71 MHz, DMSO-*d*<sub>6</sub>, 30 °C): δ = 239.70 (N7), 169.77 (N9), 104.36 (CO-NH<sub>2</sub>), 95.87 (C6-NH) ppm.

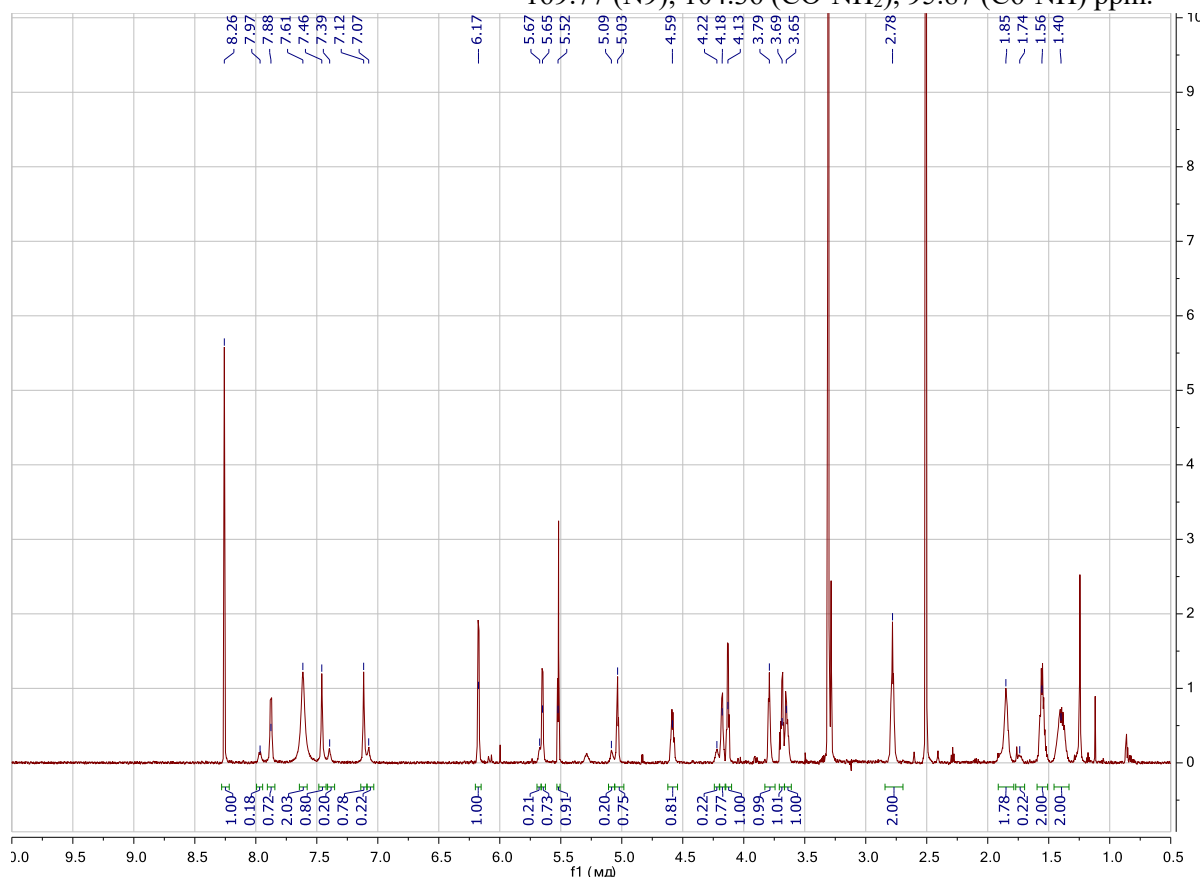

**Figure SI-48.** The <sup>1</sup>H NMR spectrum of 9-β-D-arabinofuranosyl-2-chloro-6-(N<sup>α</sup>-L-lysinylamido)-purine (10b)

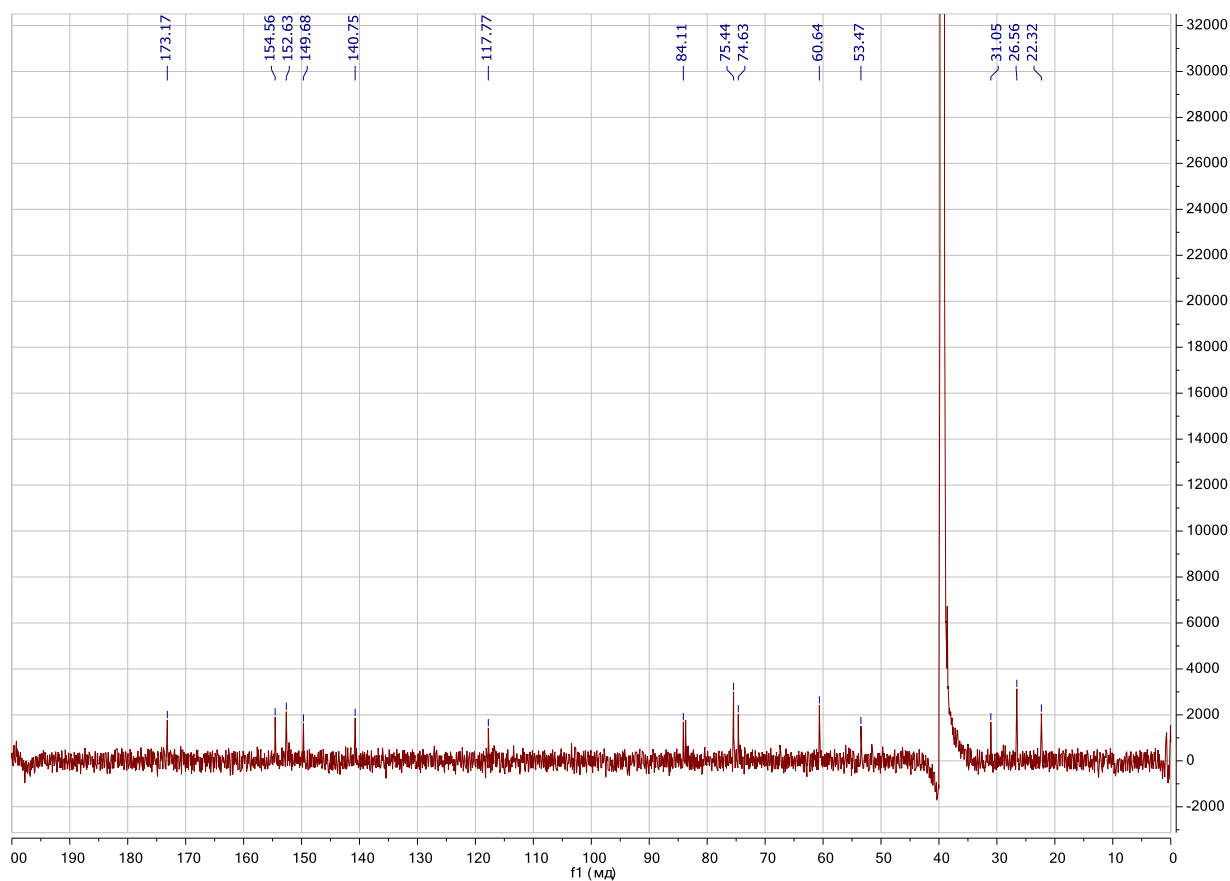

**Figure SI-49.** The  $^{13}\text{C}$  NMR spectrum of 9- $\beta$ -D-arabinofuranosyl-2-chloro-6-(N $^{\alpha}$ -L-lysinylamido)-purine (**10b**)

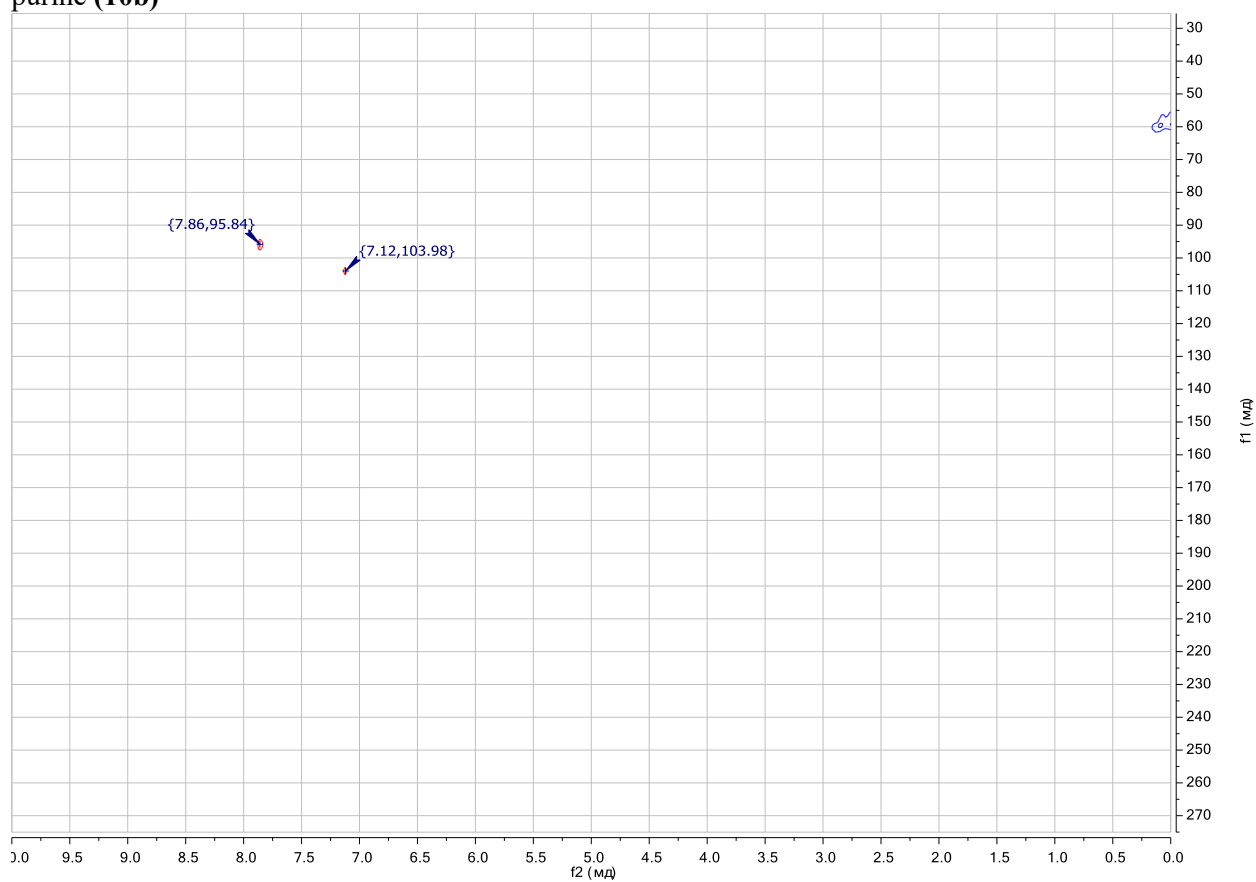

**Figure SI-50.** The  $^{15}\text{N}$  HSQC NMR spectrum of 9- $\beta$ -D-arabinofuranosyl-2-chloro-6-(N $^{\alpha}$ -L-lysinylamido)-purine (**10b**)

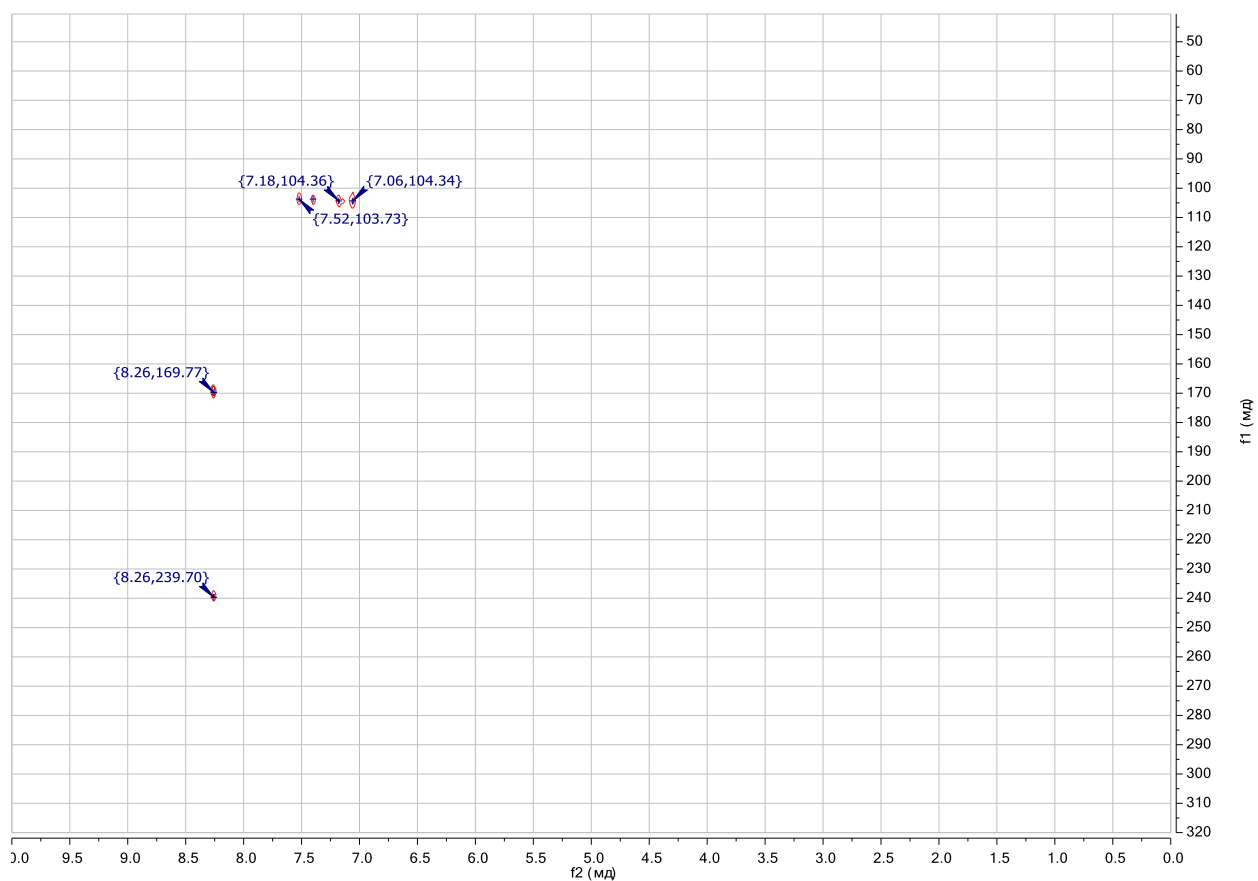

**Figure SI-51.** The  $^{15}\text{N}$  HMBC NMR spectrum of 9- $\beta$ -D-arabinofuranosyl-2-chloro-6-( $\text{N}^{\alpha}$ -L-lysinylamido)-purine (**10b**)

## SAMPLE INFORMATION

|                   |               |                  |                           |
|-------------------|---------------|------------------|---------------------------|
| Sample Name:      | <b>10b</b>    | Acquired By:     | Breeze                    |
| Sample Type:      | Unknown       | Date Acquired:   | 20.08.2018 15:02:23 GMT-4 |
| Vial:             | 1             | Acq. Method:     | 100B_dual_280nm_05ml      |
| Injection #:      | 7             | Date Processed:  | 20.08.2018 15:32:58 GMT-4 |
| Injection Volume: | 5,00 $\mu$ l  | Channel Name:    | W2489 ChA                 |
| Run Time:         | 20,00 Minutes | Channel Desc.:   | W2489 ChA 254nm           |
| Column Type:      |               | Sample Set Name: |                           |

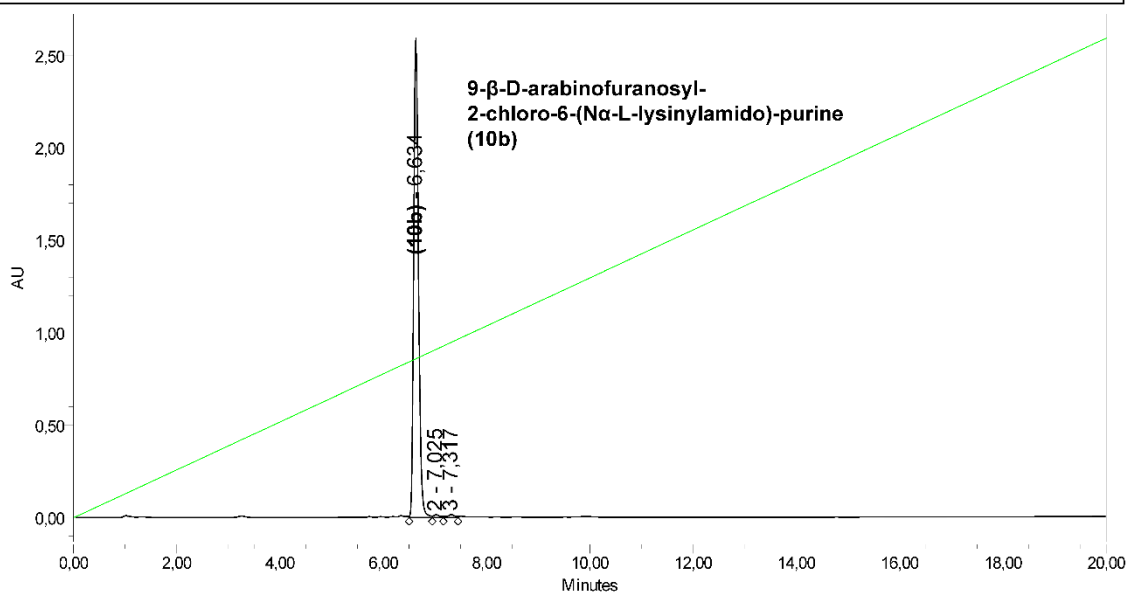

|   | Peak Name  | RT (min) | Area ( $\mu$ V*sec) | % Area | Height ( $\mu$ V) | % Height |
|---|------------|----------|---------------------|--------|-------------------|----------|
| 1 | <b>10b</b> | 6,634    | 16403915            | 98,42  | 2578532           | 98,86    |
| 2 | 2          | 7,025    | 119931              | 0,72   | 14461             | 0,55     |
| 3 | 3          | 7,317    | 142999              | 0,86   | 15234             | 0,58     |

**Figure SI-52.** The chromatogram of **10b**

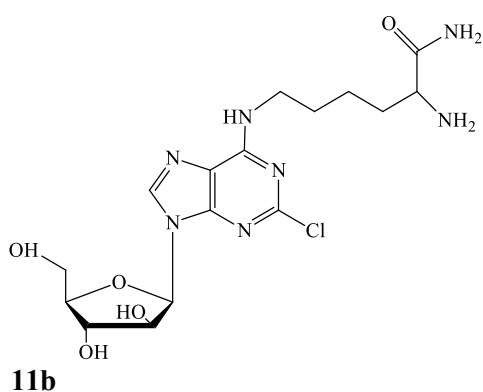

**9-β-D-arabinofuranosyl-2-chloro-6-(N<sup>ε</sup>-L-lysinylamido)-purine (11b)**

<sup>1</sup>H NMR (700 MHz, DMSO-*d*<sub>6</sub>, 30 °C): δ= 8.27 and 8.15 (br.t, 0.74H, *J*=5.1Hz, and sign., 0.26H, C6-NH), 8.19 (s, 1H, H-8), 7.24 (s, 1H, CO-NH), 6.84 (s, 1H, CO-NH), 6.16 (d, *J*=4.6 Hz, 1H, H-1'), 5.52 (br.sign, 0.88H, 2'-OH), 5.62 (br.sign, 1H, 3'-OH), 5.05 (br.sign, 0.8H, 5'-OH), 4.17 (br.sign, 1H, H-2'), 4.11 (br.sign, 1H, H-3'), 3.84 and 3.41 (br.sign, 0.4H, and m, 1.6H, Cε-H), 3.78 (m, 1H, H-4'), 3.68 (m, 1H, H-5'a), 3.64 (m, 1H, H-5'b), 3.29 (sign., 2H, Cα-NH<sub>2</sub>), 3.06 (br.t, 1H, Cα-H), 1.58 and 1.38 (m and m, 3H and 3H, Cβ-Ha and Cβ-Hb, Cγ-Ha and Cγ-Hb, Cδ-Ha and Cδ-Hb) ppm.

<sup>13</sup>C NMR (176 MHz, DMSO-*d*<sub>6</sub>, 30 °C) δ = 177.54 (CO-NH<sub>2</sub>), 154.85 (C6), 152.84 (C2), 149.34 (C4), 140.19 (C8), 117.63 (C5), 83.91 (C1'), 83.62 (C4'), 75.49 (C2'), 74.60 (C3'), 60.60 (C5'), 54.49 (Cα), 39.67 (Cβ), 34.89 (Cε), 28.63 (Cδ), 22.71 (Cγ) ppm.

<sup>15</sup>N NMR (71 MHz, DMSO-*d*<sub>6</sub>, 30 °C): δ= 239.55 (N7), 226.37 (N1), 182.96 (Cα-NH<sub>2</sub>), 168.83 (N9), 102.84 (CO-NH<sub>2</sub>), 95.28 (C6-NH) ppm.

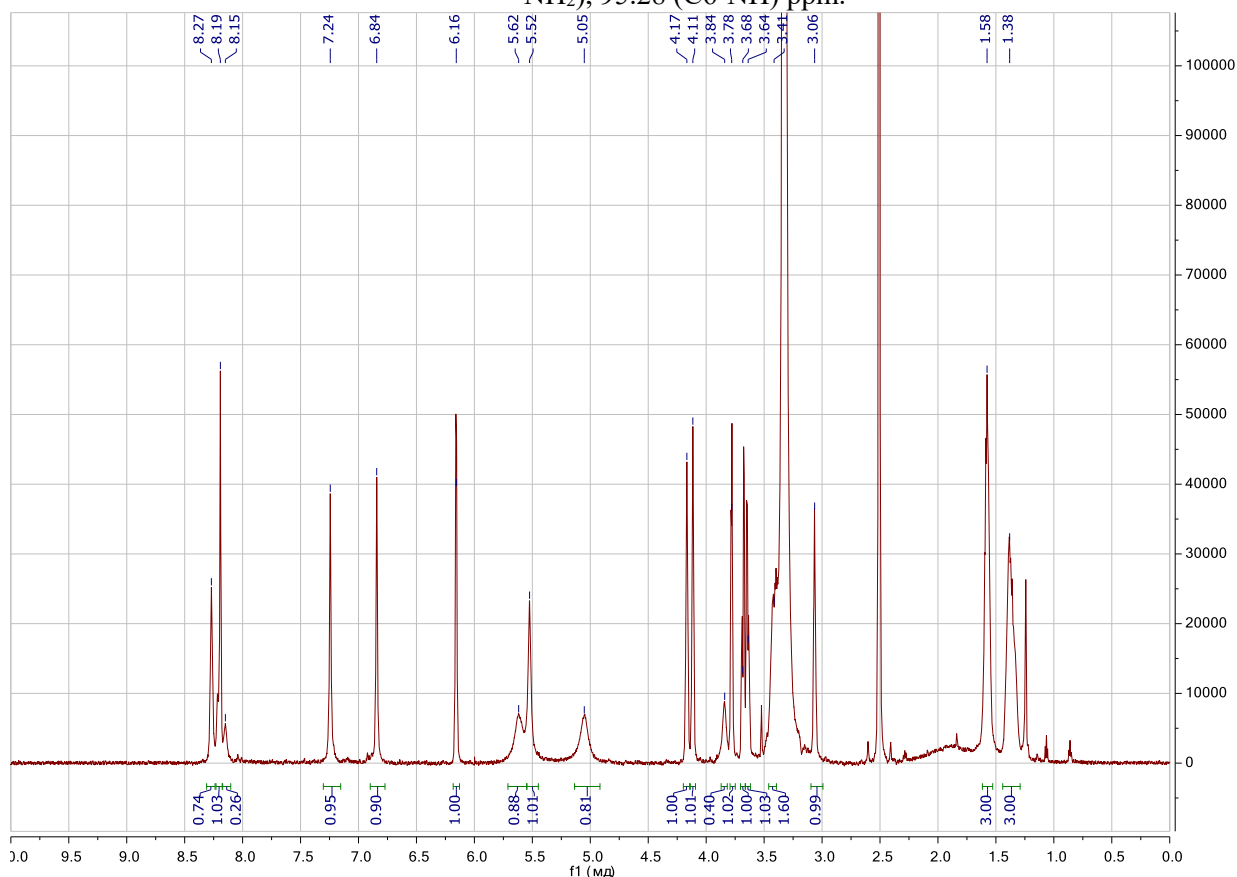

**Figure SI-53.** The <sup>1</sup>H NMR spectrum of 9-β-D-arabinofuranosyl-2-chloro-6-(N<sup>ε</sup>-L-lysinylamido)-purine (11b)

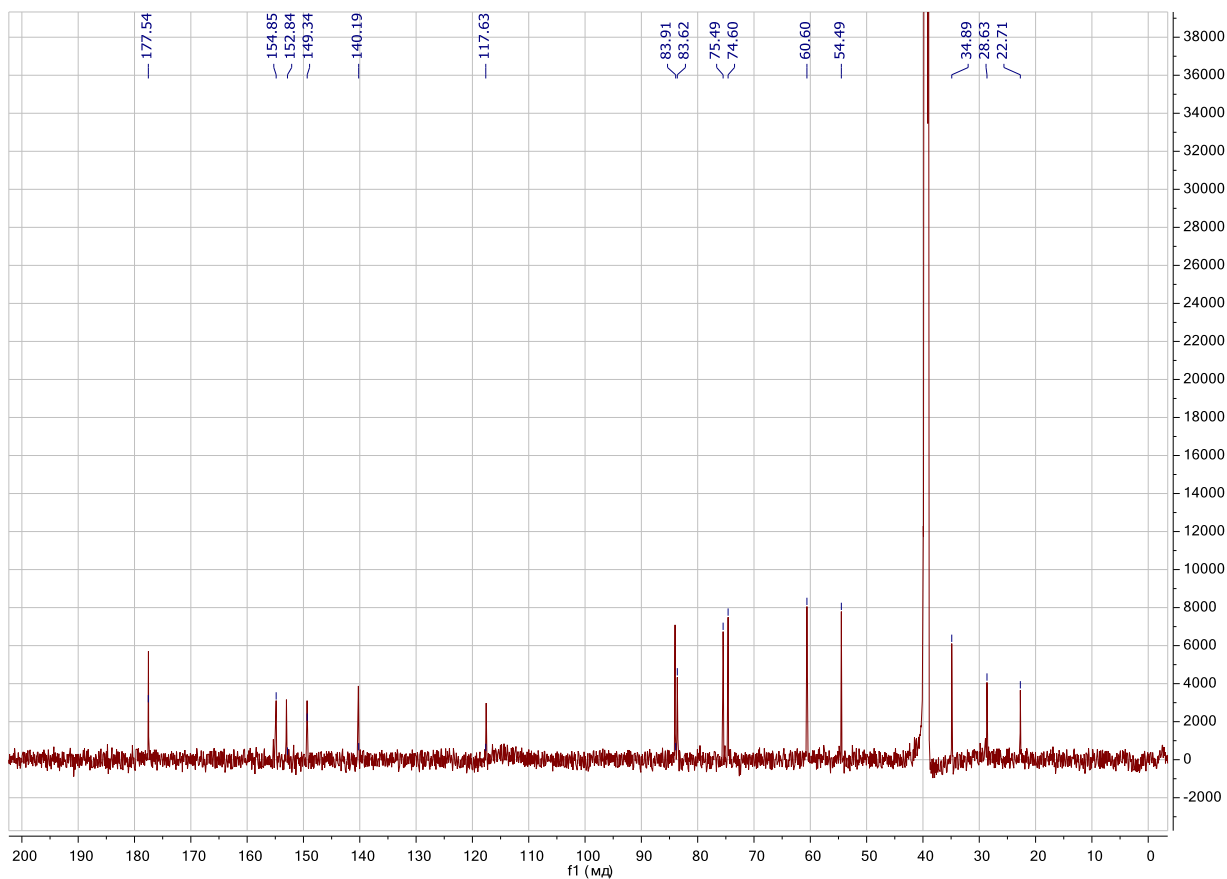

**Figure SI-54.** The  $^{13}\text{C}$  NMR spectrum 9- $\beta$ -D-arabinofuranosyl-2-chloro-6-(N $^{\epsilon}$ -L-lysinylamido)-purine (11b)

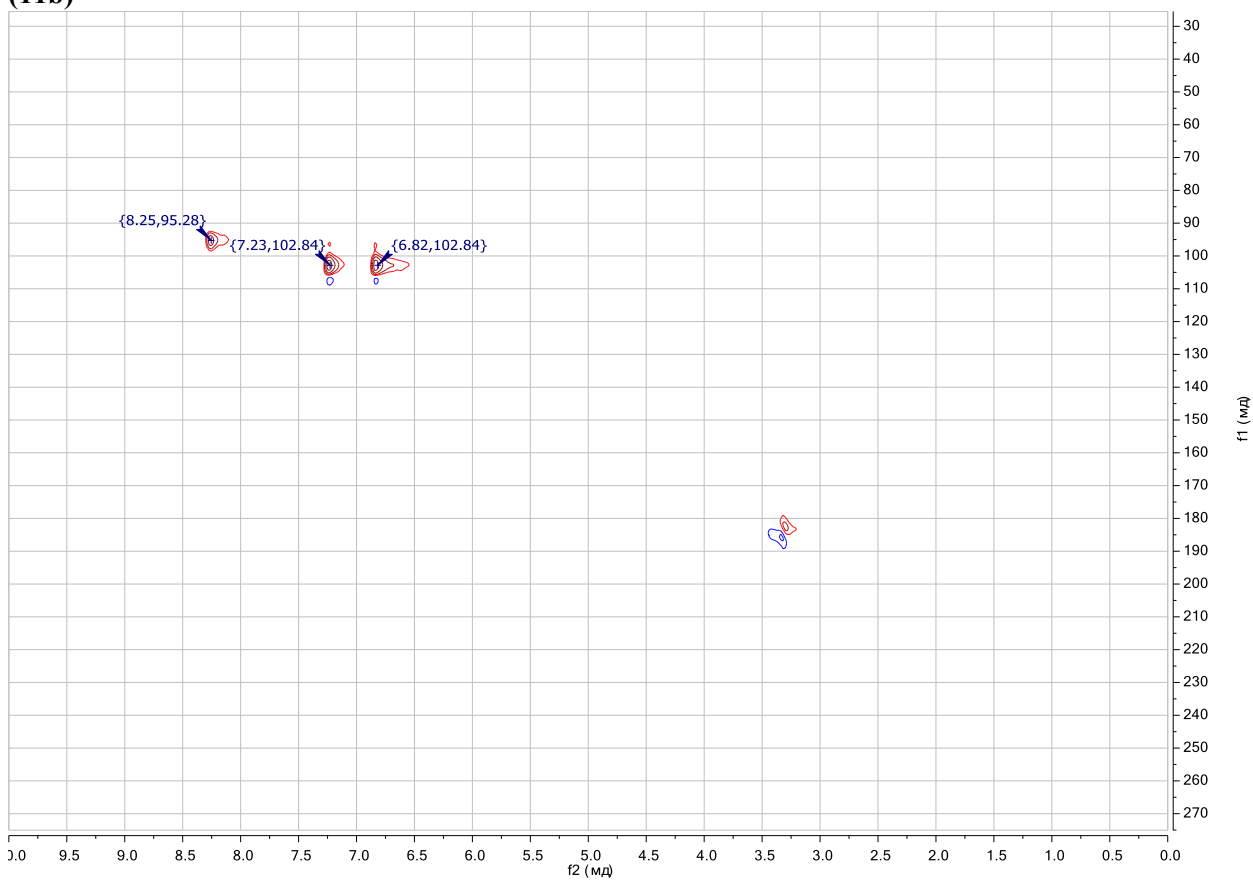

**Figure SI-55.** The  $^{15}\text{N}$  HSQC NMR spectrum 9- $\beta$ -D-arabinofuranosyl-2-chloro-6-(N $^{\epsilon}$ -L-lysinylamido)-purine (11b)

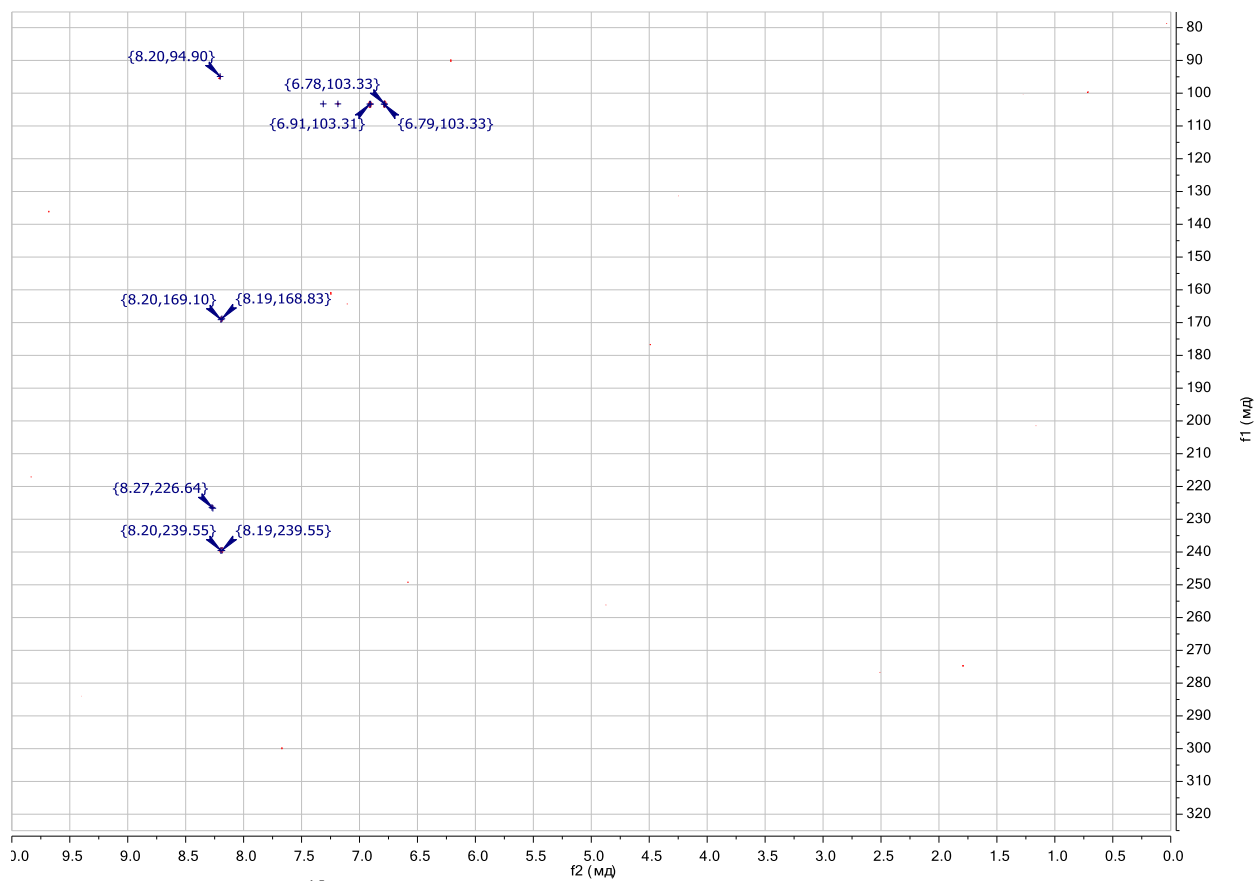

**Figure SI-56.** The  $^{15}\text{N}$  HMBC NMR spectrum of 9- $\beta$ -D-arabinofuranosyl-2-chloro-6-( $\text{N}^\epsilon$ -L-lysinylamido)-purine (**11b**)

## SAMPLE INFORMATION

|                   |               |                  |                           |
|-------------------|---------------|------------------|---------------------------|
| Sample Name:      | <b>11b</b>    | Acquired By:     | Breeze                    |
| Sample Type:      | Unknown       | Date Acquired:   | 03.06.2016 14:55:46 GMT-4 |
| Vial:             | 1             | Acq. Method:     | 100B_dual_280nm_05ml      |
| Injection #:      | 2             | Date Processed:  | 03.06.2016 15:19:11 GMT-4 |
| Injection Volume: | 2,50 ul       | Channel Name:    | W2489 ChA                 |
| Run Time:         | 20,00 Minutes | Channel Desc.:   | W2489 ChA 254nm           |
| Column Type:      |               | Sample Set Name: |                           |

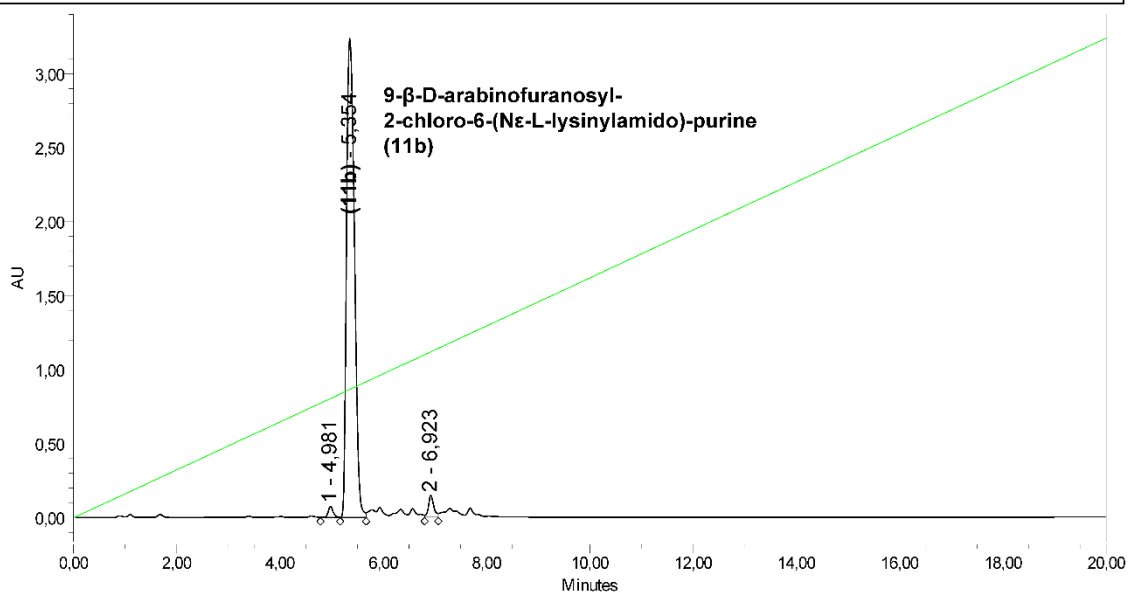

|   | Peak Name  | RT (min) | Area (μV*sec) | % Area | Height (μV) | % Height |
|---|------------|----------|---------------|--------|-------------|----------|
| 1 | 1          | 4,981    | 497034        | 1,37   | 73755       | 2,13     |
| 2 | <b>11b</b> | 5,354    | 34567547      | 95,62  | 3247593     | 93,59    |
| 3 | 2          | 6,923    | 1086716       | 3,01   | 148787      | 4,29     |

**Figure SI-57.** The chromatogram of **11b**

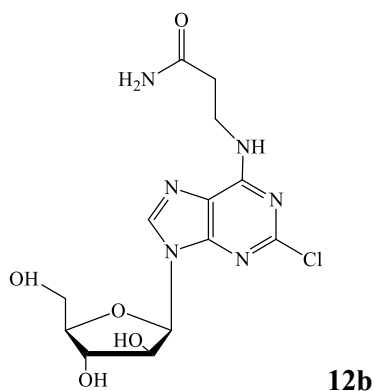

**9-β-D-arabinofuranosyl-2-chloro-6-(N-(3-amino-3-oxopropyl))-purine (12b)**

$^1\text{H}$  NMR (700 MHz,  $\text{DMSO-}d_6$ , 30 °C):  $\delta$ = 8.24 and 8.21 (2 sign., 0.18H and 0.82, H-8), 8.14 and 8.04 (br.t, 0.8H, and m, 0.15H, C6-NH), 7.35 and 7.31 (2 sign., 0.80H and 0.20H, H-8, CO-NH), 6.84 (s, 1H, CO-NH), 6.16 (br.d, 1H, H-1'), 5.62 (br.d., 1H, 2'-OH), 5.52 (br.d., 1H, 3'-OH), 5.05 (br.sign, 1H, 5'-OH), 4.17 (m, 1H, H-2'), 4.12 (m, 1H, H-3'), 4.04 (m, 0.39H, C $\alpha$ H-a) 3.78 (m, 1H, H-4'), 3.69 (m, 1H, H-5'a), 3.65 (m, 1H, H-5'b), 3.63 (m, 1.54H, C $\alpha$ H-b) 2.44. (t,  $J$  = 7.1 Hz, 2H, C $\beta$ H) ppm.

$^{13}\text{C}$  NMR (176 MHz,  $\text{DMSO-}d_6$ , 30 °C):  $\delta$ = 172.43 (CO-NH $_2$ ), 154.71(C6), 152.93 (C2), 149.40 (C4), 140.44 (C8), 117.65 (C5), 84.01 (C4'), 83.62 (C1'), 75.48 (C2'), 74.55 (C3'), 60.58 (C5'), 36.57 (C $\alpha$ ), 34.27 (C $\beta$ ) ppm.

$^{15}\text{N}$  NMR (71 MHz,  $\text{DMSO-}d_6$ , 30 °C):  $\delta$ = 109.5 (CO-NH $_2$ ) ppm.

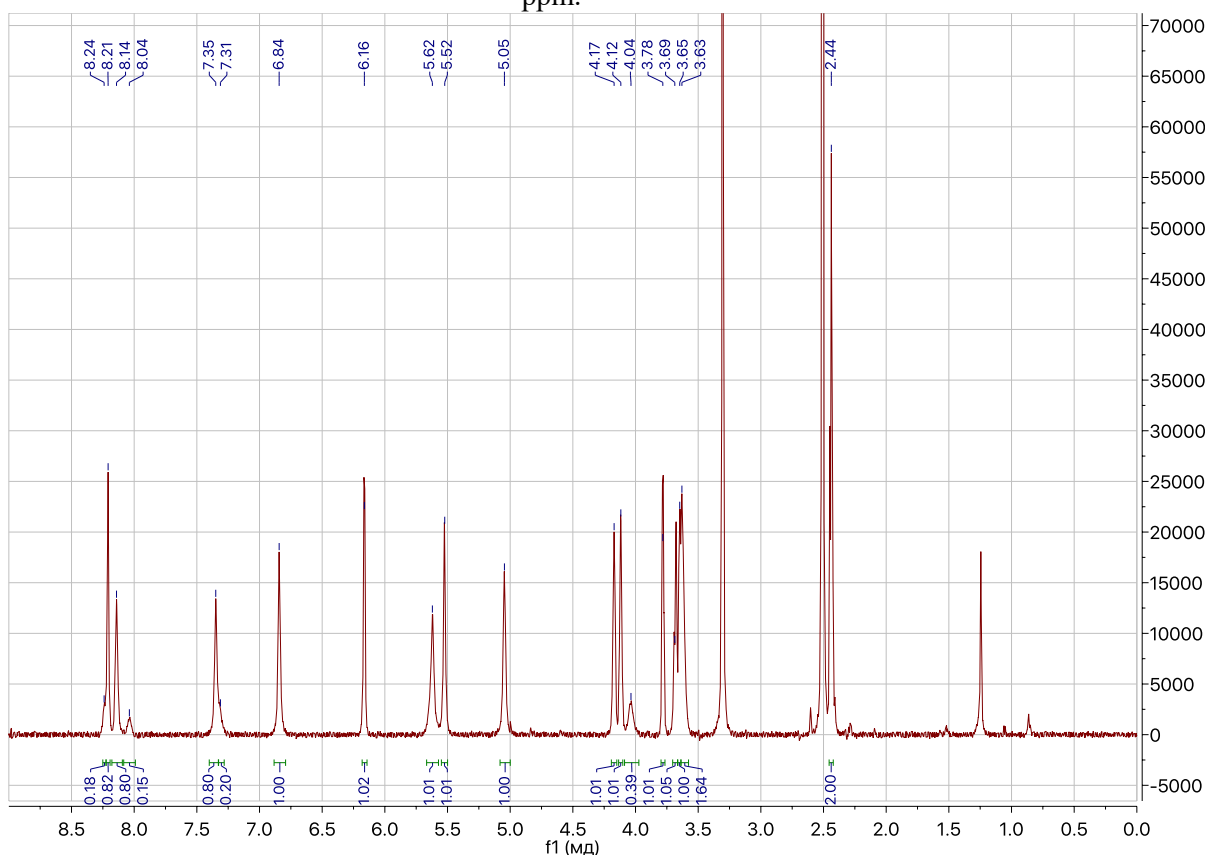

**Figure SI-58.** The  $^1\text{H}$  NMR spectrum of 9-β-D-arabinofuranosyl-2-chloro-6-(N-(3-amino-3-oxopropyl))-purine (**12b**)

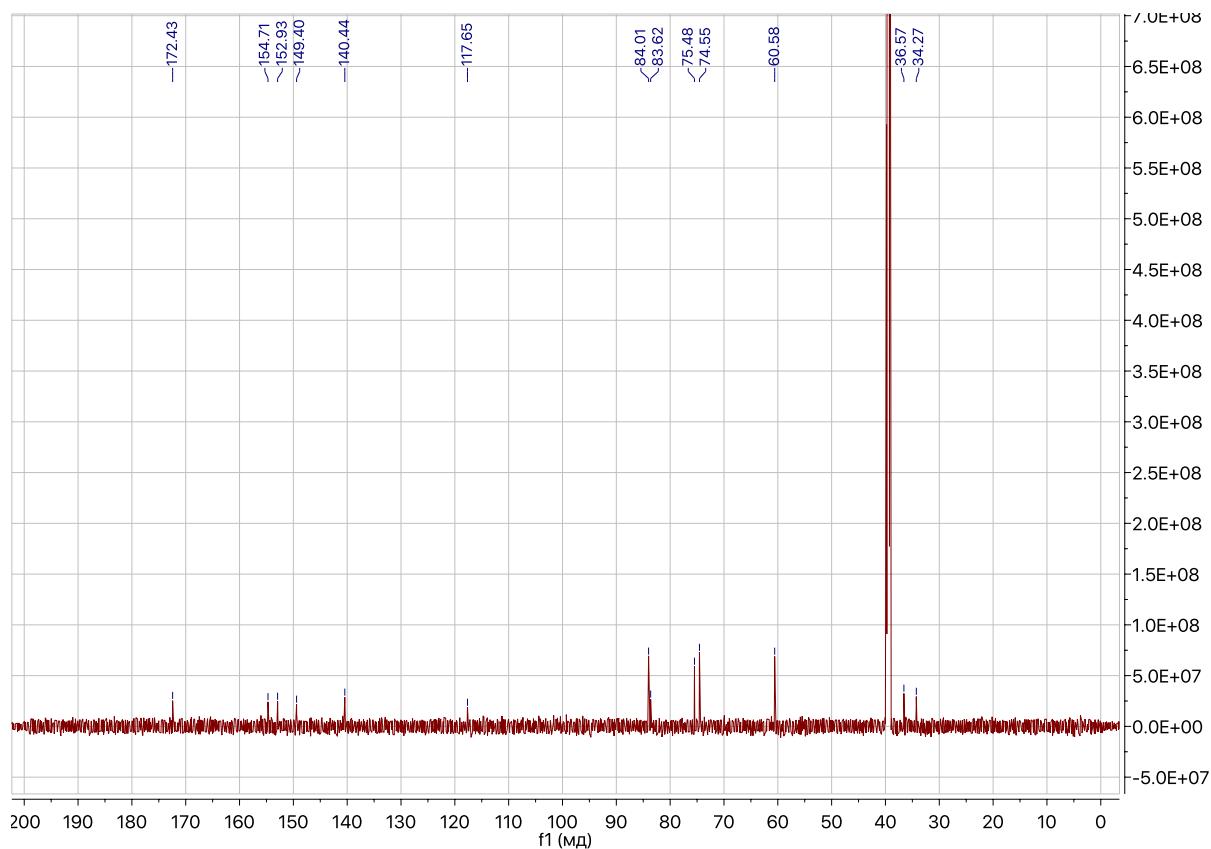

**Figure SI-59.** The  $^{13}\text{C}$  NMR spectrum of 9- $\beta$ -D-arabinofuranosyl-2-chloro-6-(*N*-(3-amino-3-oxopropyl))-purine (**12b**)

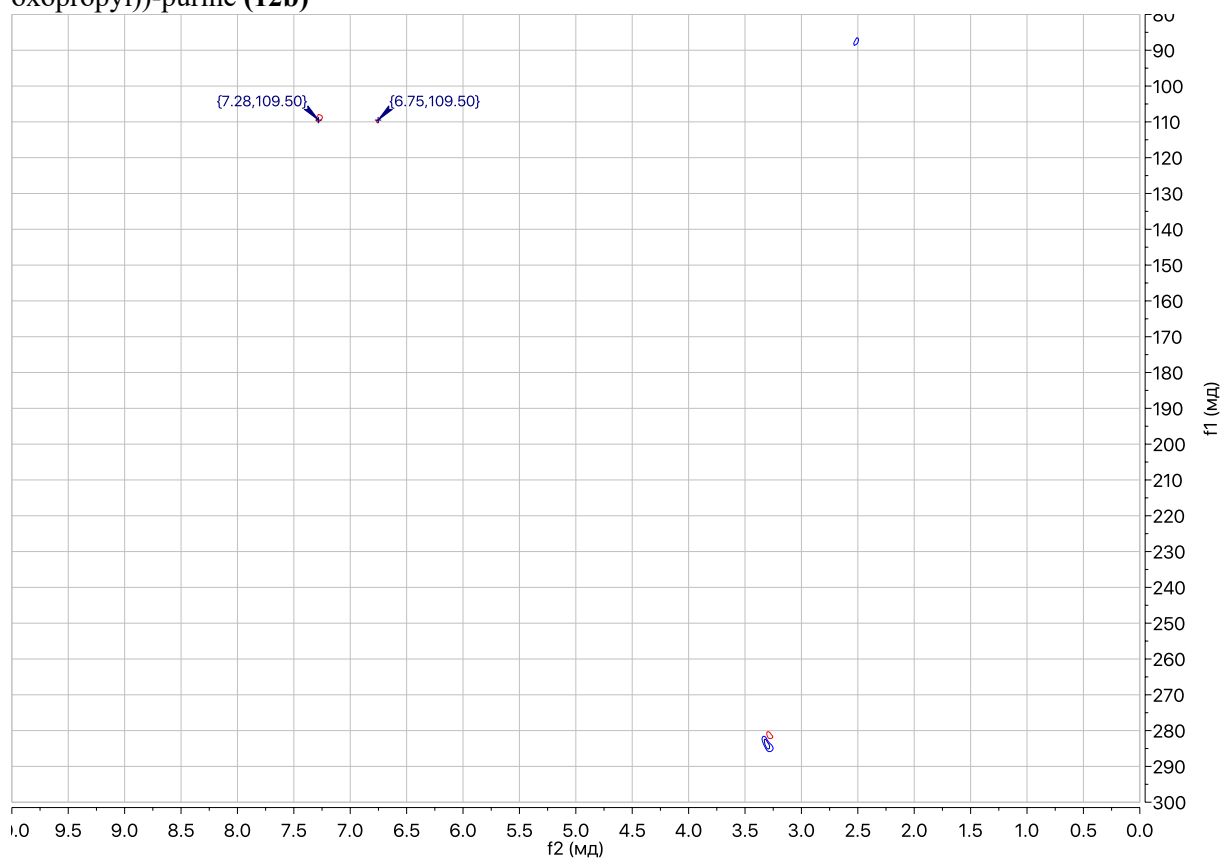

**Figure SI-60.** The  $^{15}\text{N}$  HSQC NMR spectrum of 9- $\beta$ -D-arabinofuranosyl-2-chloro-6-(*N*-(3-amino-3-oxopropyl))-purine (**12b**)

## SAMPLE INFORMATION

|                   |               |                  |                     |
|-------------------|---------------|------------------|---------------------|
| Sample Name:      | 12b           | Acquired By:     | System              |
| Sample Type:      | Unknown       | Date Acquired:   | 13.05.2013 18:59:08 |
| Vial:             | 1             | Acq. Method:     | 100B_dual_280       |
| Injection #:      | 4             | Date Processed:  | 13.05.2013 19:23:49 |
| Injection Volume: | 15,00 ul      | Channel Name:    | 2487Channel 2       |
| Run Time:         | 20,00 Minutes | Sample Set Name: |                     |
| Column Type:      |               |                  |                     |

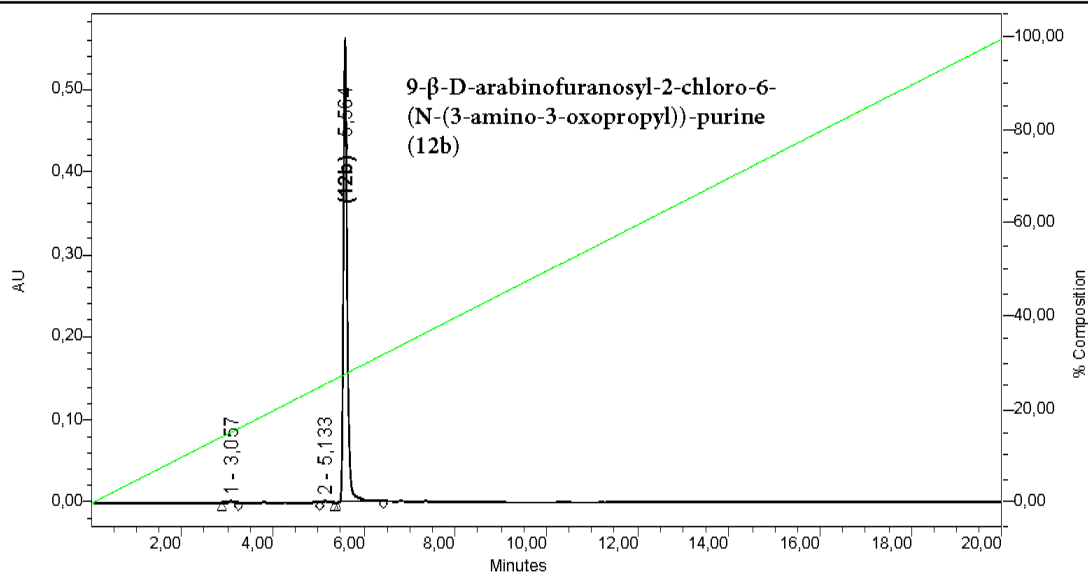

|   | Peak Name | RT (min) | Area (V*sec) | % Area | Height (V) | % Height |
|---|-----------|----------|--------------|--------|------------|----------|
| 1 | 1         | 3,057    | 14808        | 0,45   | 2615       | 0,47     |
| 2 | 2         | 5,133    | 13713        | 0,42   | 1964       | 0,35     |
| 3 | 12b       | 5,564    | 3248284      | 99,13  | 556922     | 99,18    |

Figure SI-61. The chromatogram of 12b

## Synthesis and NMR spectra of compounds 15 and 16

### 2-Chloro-9-(beta-D-ribofuranosyl)adenine (15)

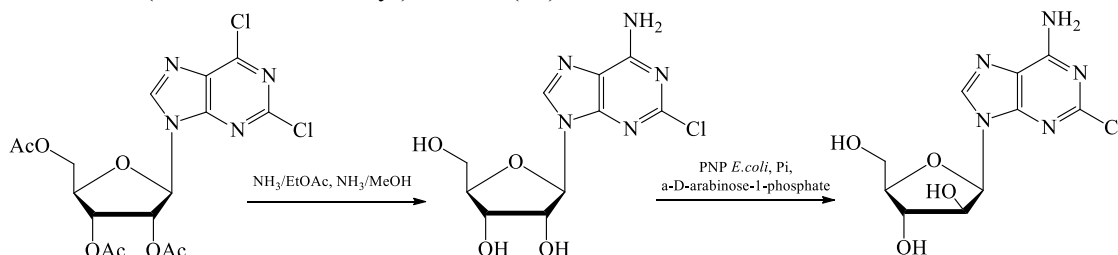

**Scheme SI-1.**

The method for synthesis of 2,6-dichloro-9-(2',3',5'-tri-*O*-acetyl- $\beta$ -*D*-ribofuranosyl)purine was described earlier[1]. 2-chloradenosine was obtained from 2,6-dichloro-9-(2',3',5'-tri-*O*-acetyl- $\beta$ -*D*-ribofuranosyl)purine according to a known method.

40 g (89.44 mmol) of 2,6-dichloro-9-(2',3',5'-tri-*O*-acetyl- $\beta$ -*D*-ribofuranosyl)purine was dissolved in 1.2 L of anhydrous ethyl acetate and saturated with ammonia at 0 °C. The mixture was kept at 0°C for 3 days, then the residue was filtered off. Mixture of di-*O*-acetyl derivatives of 2-chloroadenosine was obtained (29.6 g, 86%) (LC-MS data, not shown). The residue was dissolved in 1.2 L of anhydrous methanol, and the solution was saturated with ammonia while stirring at room temperature, then cooled to 0 °C and kept for 5 days. The reaction mixture was evaporated, the residue was refluxed in 200 ml of a mixture of chloroform-methanol 3:1 and cooled. The precipitate was filtered off. 2-Chloradenosine (22.88 g, 85%) was obtained as white solid with a purity of 99.73% (HPLC data on a Nova-Pak column C18 4.6×150 mm, 5  $\mu$ m, gradient 0-30% B over 20 minutes; m.p. 188-189 °C;  $\lambda_{\text{max}}$  263.8 nm, extinction coefficient 13800.  $M/z$ :  $[M+H]^+$ : 302.0651 calcd, 302.0658 found.  $^1\text{H}$  NMR (700 MHz,  $\text{DMSO}-d_6$ , 30 °C):  $\delta$  8.39 (s, 1H, H-8), 7.83 (br.s, 2H,  $\text{NH}_2$ ), 5.82 (d,  $J = 5.99$  Hz, 1H,  $\text{H}_{1'}$ ), 5.46 (d,  $J = 6.22$  Hz, 1H,  $\text{OH}_{2'}$ ), 5.18 (d,  $J = 4.96$  Hz, 1H,  $\text{OH}_{3'}$ ), 5.05 (t,  $J = 5.66$  Hz, 1H,  $\text{OH}_{5'}$ ), 4.53 (m, 1H,  $\text{H}_{2'}$ ), 4.13 (m, 1H,  $\text{H}_{3'}$ ), 3.95 (m, 1H,  $\text{H}_{4'}$ ), 3.67 (m, 1H,  $\text{H}_{5'a}$ ), 3.56 ppm (m, 1H,  $\text{H}_{5'a}$ ).

1. Berzina, M.Y., et al., Synthesis of 2-chloropurine ribosides with chiral amino acid amides at C6 and their evaluation as A1 adenosine receptor agonists. *Bioorganic Chemistry*, 2022. **126**: p. 105878.

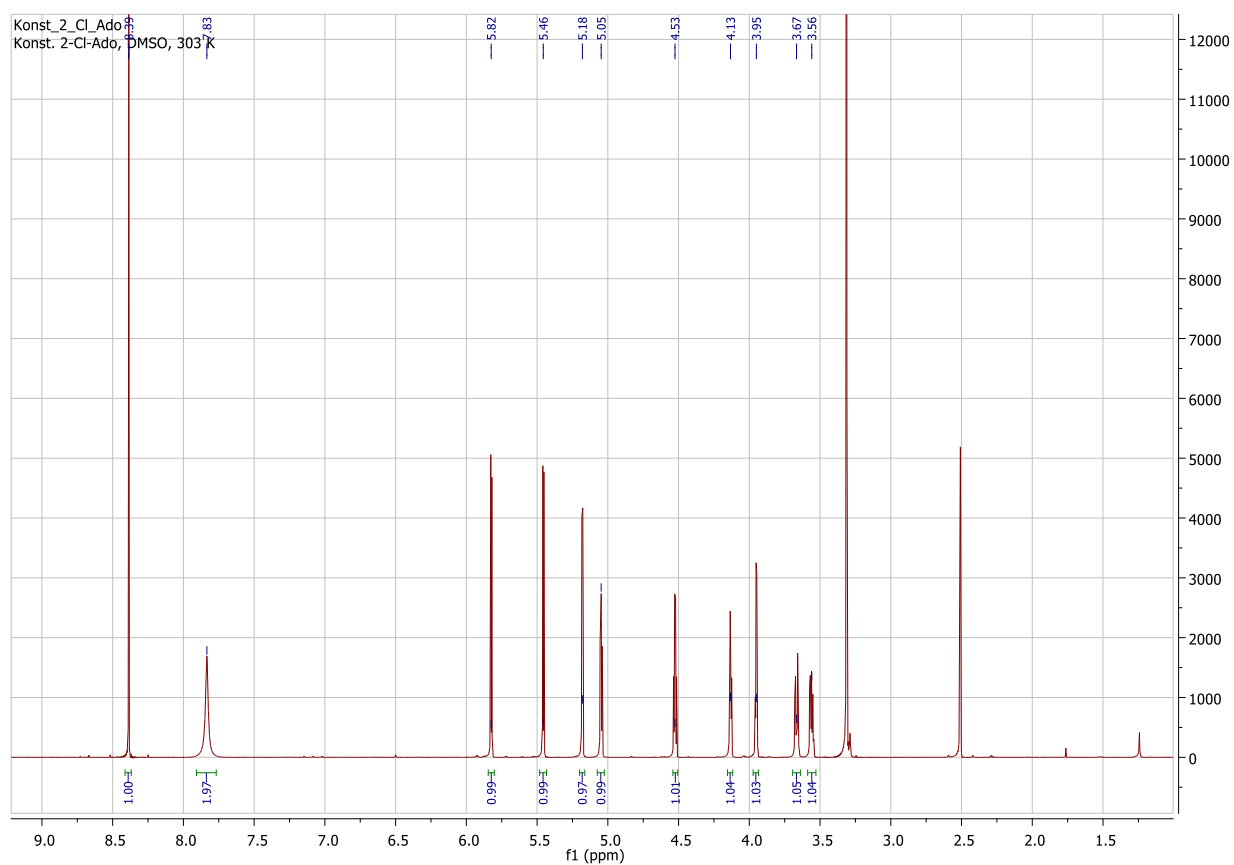

**Figure SI-62.** The  $^1\text{H}$  NMR spectrum of 2-Cl-Ado

BT

Project Name: TESTLast\_1  
Reported by User: System

Breeze

## SAMPLE INFORMATION

|                   |               |                  |                     |
|-------------------|---------------|------------------|---------------------|
| Sample Name:      | 2Cl-Ado-1     | Acquired By:     | System              |
| Sample Type:      | Unknown       | Date Acquired:   | 16.11.2009 18:40:36 |
| Vial:             | 1             | Acq. Method:     | 30B_dual225_254     |
| Injection #:      | 3             | Date Processed:  | 16.11.2009 19:02:02 |
| Injection Volume: | 20,00 µl      | Channel Name:    | 2487Channel 1       |
| Run Time:         | 25,00 Minutes | Sample Set Name: |                     |
| Column Type:      |               |                  |                     |

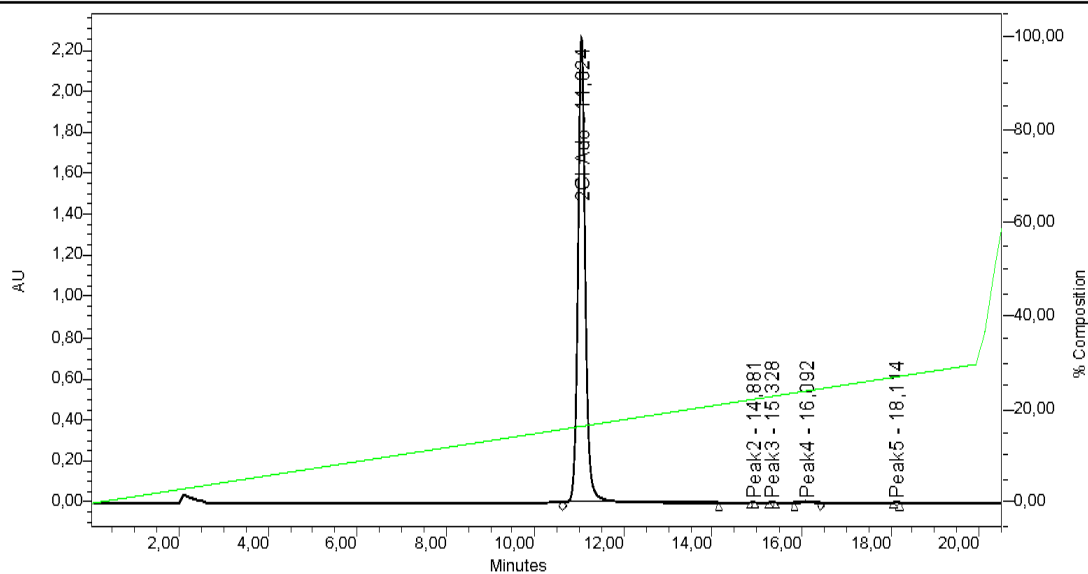

|   | Peak Name | RT (min) | Area (V*sec) | % Area | Height (V) | % Height |
|---|-----------|----------|--------------|--------|------------|----------|
| 1 | 2Cl-Ado   | 11,024   | 26439137     | 99,73  | 2270864    | 99,70    |
| 2 | Peak2     | 14,881   | 1428         | 0,01   | 375        | 0,02     |
| 3 | Peak3     | 15,328   | 3676         | 0,01   | 650        | 0,03     |
| 4 | Peak4     | 16,092   | 62072        | 0,23   | 5021       | 0,22     |
| 5 | Peak5     | 18,114   | 4248         | 0,02   | 879        | 0,04     |

**Figure SI-63.** The chromatogram of 2-Cl-Ado

The reaction conditions of 6-Amino-2-chloro-9- $\beta$ -D-arabinofuranosyl-9H-purine (**16**) synthesis 0.2 g (0.65 mol) 2-Cl-Ado riboside, 0.15 g (1.1 mol)  $\text{KH}_2\text{PO}_4$  and 1.922 g (1.6 mol)  $\alpha$ -D-arabinose-1-phosphate were dissolved in 220 ml water 40-50°C and pH was adjusted up to 7.0. The enzyme PNP *E.coli* (166 e.u.) was added and the reaction mixtures were incubated at 50°C. Reactions were monitored by HPLC. When conversion reached the highest value 98.5%, the reaction was stopped by cooling to room temperature. The formed precipitate was filtered off on a glass filter, washed with cold water and dried. The target arabinoside was obtained in 65% yield (0.130 g, 0.42 mol) and 99.8% purity ( $R_t = 9.44$  min, isocratic flow 7% eluent B 20 min, column Nova Pak C18, 4.6 $\times$ 150 mm, 5 mkm, flow rate 1 ml/min, Eluent A: water + 0.1% TFA. Eluent B: 70% acetonitrile: 30% water + 0.1% TFA).  $\lambda_{\text{max}}$  262, 210 nm.  $^1\text{H}$  NMR (700 MHz,  $\text{DMSO-}d_6$ , 30 °C):  $\delta = 8.20$  (s, 1H, H-8), 7.75 (s, 2H,  $\text{NH}_2$ ), 6.16 (br.s., 1H,  $\text{H}_{1'}$ ), 5.61 (br.s., 1H,  $\text{OH}_2'$ ), 5.51 (br.s., 1H,  $\text{OH}_3'$ ), 5.04 (br.s., 1H,  $\text{OH}_5'$ ), 4.17 (br.s., 1H,  $\text{H}_2'$ ), 4.12 (br.s., 1H,  $\text{H}_3'$ ), 3.78 (br.s., 1H,  $\text{H}_4'$ ), 3.68 and 3.65 ppm (2 br.s., 2H,  $\text{H}_5'$ ).

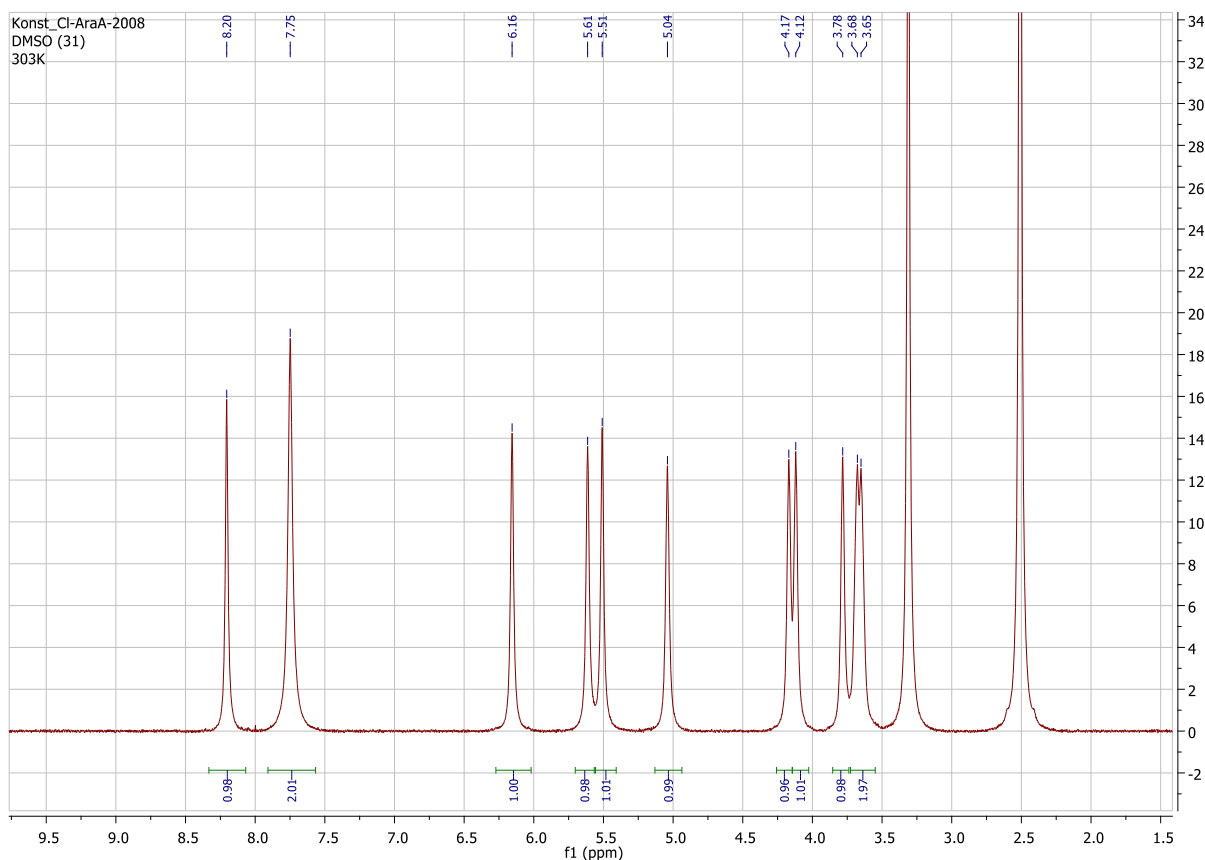

**Figure SI-64.** The  $^1\text{H}$  NMR spectrum 6-Amino-2-chloro-9- $\beta$ -D-arabinofuranosyl-9H-purine (2-Cl-AraA)

BT

Project Name: TESTLast\_1  
Reported by User: System

Breeze

## SAMPLE INFORMATION

|                   |               |                  |                     |
|-------------------|---------------|------------------|---------------------|
| Sample Name:      | 2-Cl-AraA     | Acquired By:     | System              |
| Sample Type:      | Unknown       | Date Acquired:   | 13.10.2008 17:04:34 |
| Vial:             | 1             | Acq. Method:     | iso ~7B%            |
| Injection #:      | 1             | Date Processed:  | 30.03.2009 14:33:40 |
| Injection Volume: | 15,00 ul      | Channel Name:    | 2487Channel 1       |
| Run Time:         | 18,00 Minutes | Sample Set Name: |                     |
| Column Type:      |               |                  |                     |

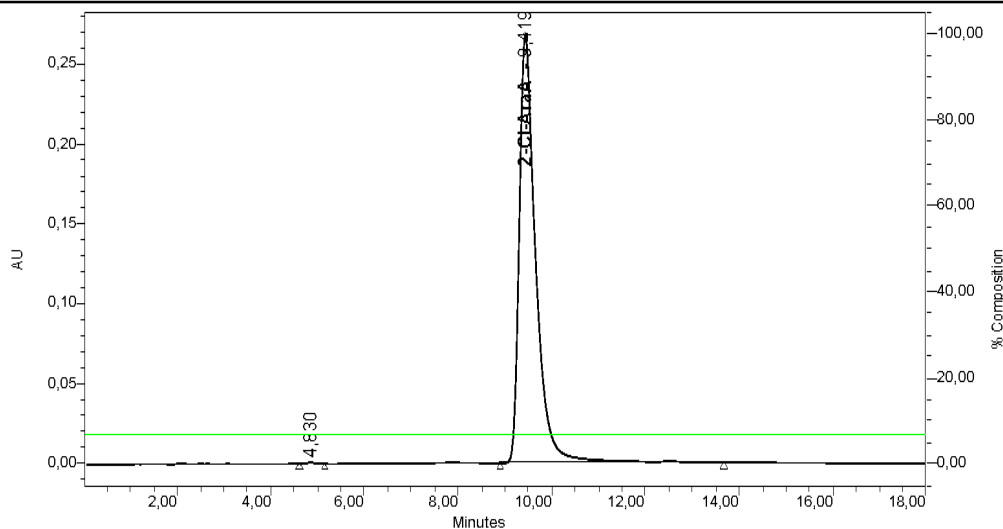

|   | Peak Name | RT (min) | Area (V*sec) | % Area | Height (V) | % Height |
|---|-----------|----------|--------------|--------|------------|----------|
| 1 |           | 4,830    | 10816        | 0,16   | 895        | 0,33     |
| 2 | 2-Cl-AraA | 9,419    | 6589178      | 99,84  | 268245     | 99,67    |

**Figure SI-65.** The chromatogram of 2-Cl-AraA

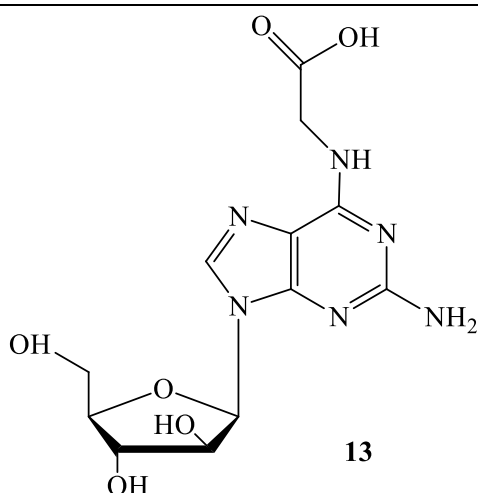

### 2-amino-9-β-D-arabinofuranosyl-6-(N<sup>α</sup>-glyciny)-purine (13)

100 mg N-(2-amino-9H-purin-6-yl)-glycine (Method for the synthesis heterobase was described in (Krasnov, Vigorov et al. 2015, Gruzdev, Vigorov et al. 2016), (0.4 mmol), 352 mg AraU (1.44 mol) was dissolved in 300 ml KH<sub>2</sub>PO<sub>4</sub> buffer solution (326 mg, pH = 7.0). The enzyme 840 e.u. PNP *E.coli*, 816 e.u. UP *E.coli* was added and the reaction mixtures for 196 h. After removing the solvent from the reaction mixture in a vacuum (15 mm Hg), separation of the components was carried out on a Toyopearl DEAE-650C ion-exchange resin. The mobile phase: aqueous solution of NH<sub>4</sub>HCO<sub>3</sub> (1.0 M, pH 7.5). Elution was carried out in two stages: with distilled water until the final release of trace amounts of Ura and AraU. Then, gradually increasing the concentration from 0.1 to 1.0 mmol, with a solution of ammonium bicarbonate. Fractions containing the reaction product were concentrated and dried in vacuo over phosphorus pentoxide. The target arabinoside was obtained in 58% yield (0.094 g, 0.276 mmol) and 99.01% purity (Rt = 4.9 min, gradient flow 0-70% B over 20 minutes, column Nova Pak C18, 4.6×150 mm, 5 mkm, flow rate 1 ml/min, Eluent A: water + 0.1% TFA. Eluent B: 70% acetonitrile: 30% water + 0.1% TFA). [α]<sub>D</sub><sup>25</sup> = 12.40° (c 0.5, H<sub>2</sub>O). M.p. 248-250 °C; λ<sub>max</sub> 281nm, extinction coefficient 7770. M/z C<sub>12</sub>H<sub>16</sub>N<sub>6</sub>O<sub>6</sub>: [M+H]<sup>+</sup>: 341.1210 calcd, 341.1204 found.

<sup>1</sup>H NMR (700 MHz, DMSO-*d*<sub>6</sub>, 30 °C): δ= 12.43 (br.sign., 1H, COOH), 7.79 (s., 1H, H8), 7.31 (s., 1H, NH-CH<sub>2</sub>), 6.08 (br.sign., 1H, H1'), 5.87 (br.sign., 2H, NH<sub>2</sub>), 5.60 (br.sign., 1H, OH-2'), 5.45 (br.sign., 1H, OH-3'), 5.05 (br.sign., 1H, OH-5'), 4.08 (br.sign., 1H, H-3'), 4.07 (s., 2H, NH-CH<sub>2</sub>), 4.02 (s., 1H, H-2'), 3.74 (s., 1H, H-4'), 3.64 (br.sign., 1H, H-5'), 3.61 (br.sign., 1H, H-5') ppm.

<sup>13</sup>C NMR (176 MHz, DMSO-*d*<sub>6</sub>, 30 °C) δ= 151.5 (C4), 137.46 (C8), 113.2 (C5), 83.74 (C-1'), 75.88 (C-2'), 75.99 (C-3'), 41.61 (NH-CH<sub>2</sub>), 84.57 (C-4'), 61.48 (C-5') ppm.

<sup>15</sup>N NMR (71 MHz, DMSO-*d*<sub>6</sub>, 30 °C) δ= 239.02 (N-7), 162.89 (N-9), 78.52 (NH<sub>2</sub>) ppm.

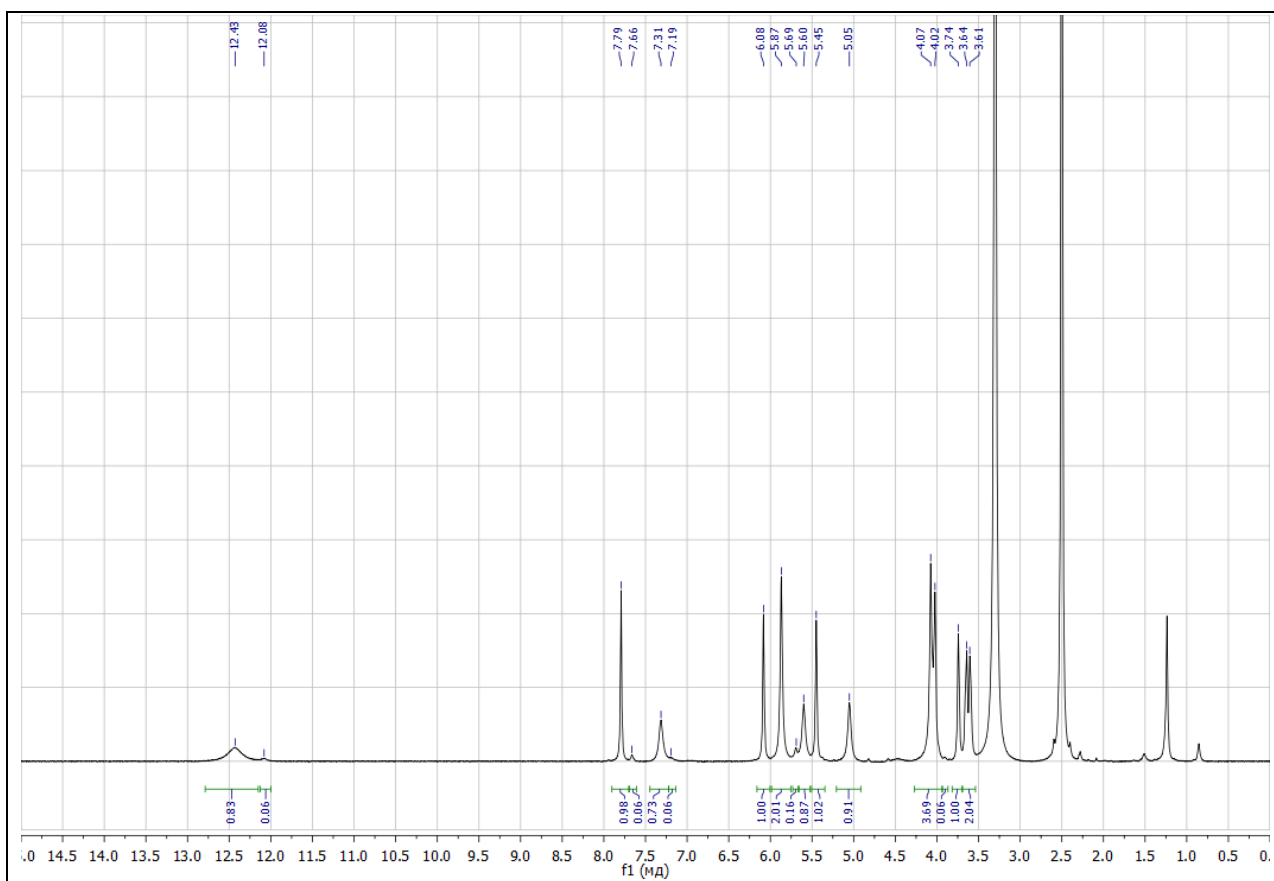

**Figure SI-66.** The  $^1\text{H}$  NMR spectrum **13**

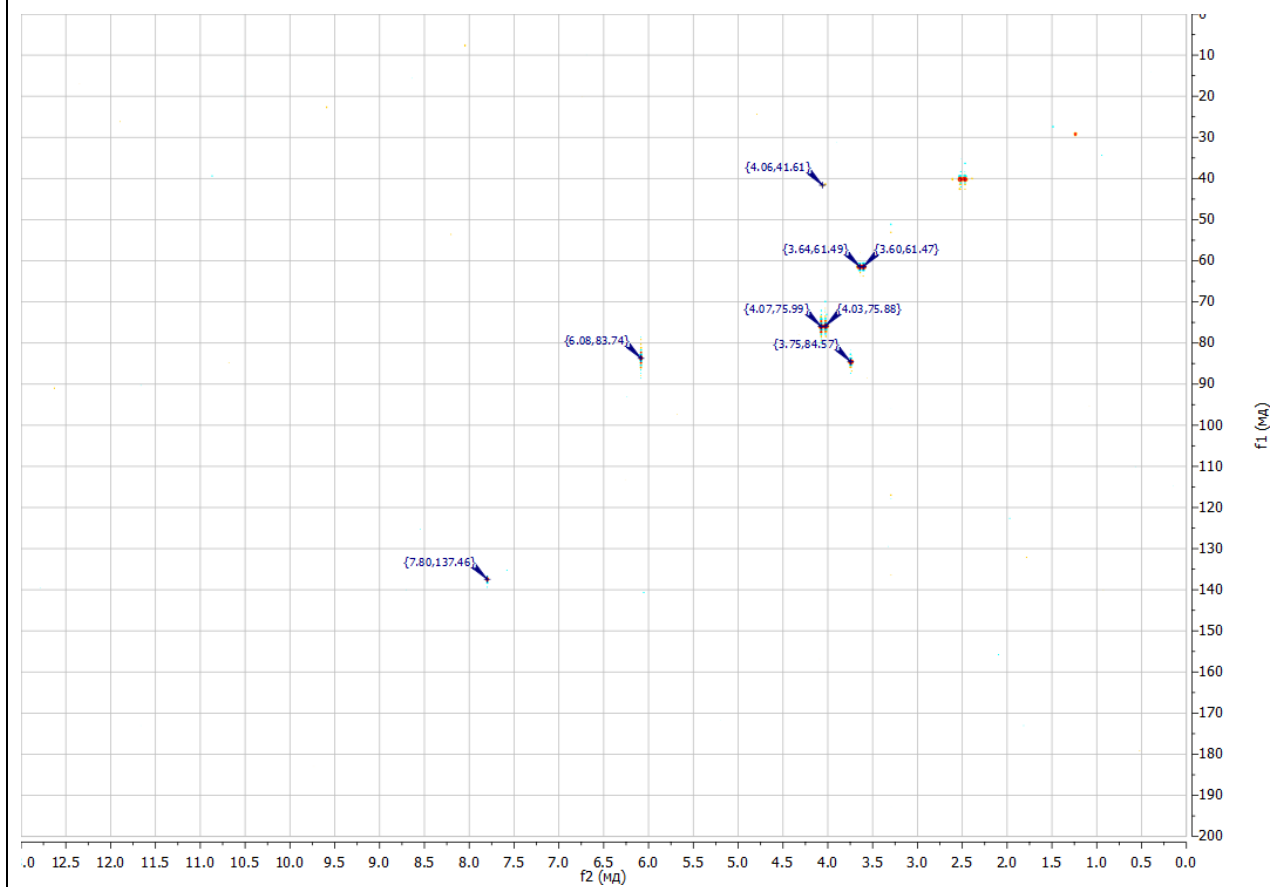

**Figure SI-67.** The  $^{13}\text{C}$  HSQC NMR spectrum **13**

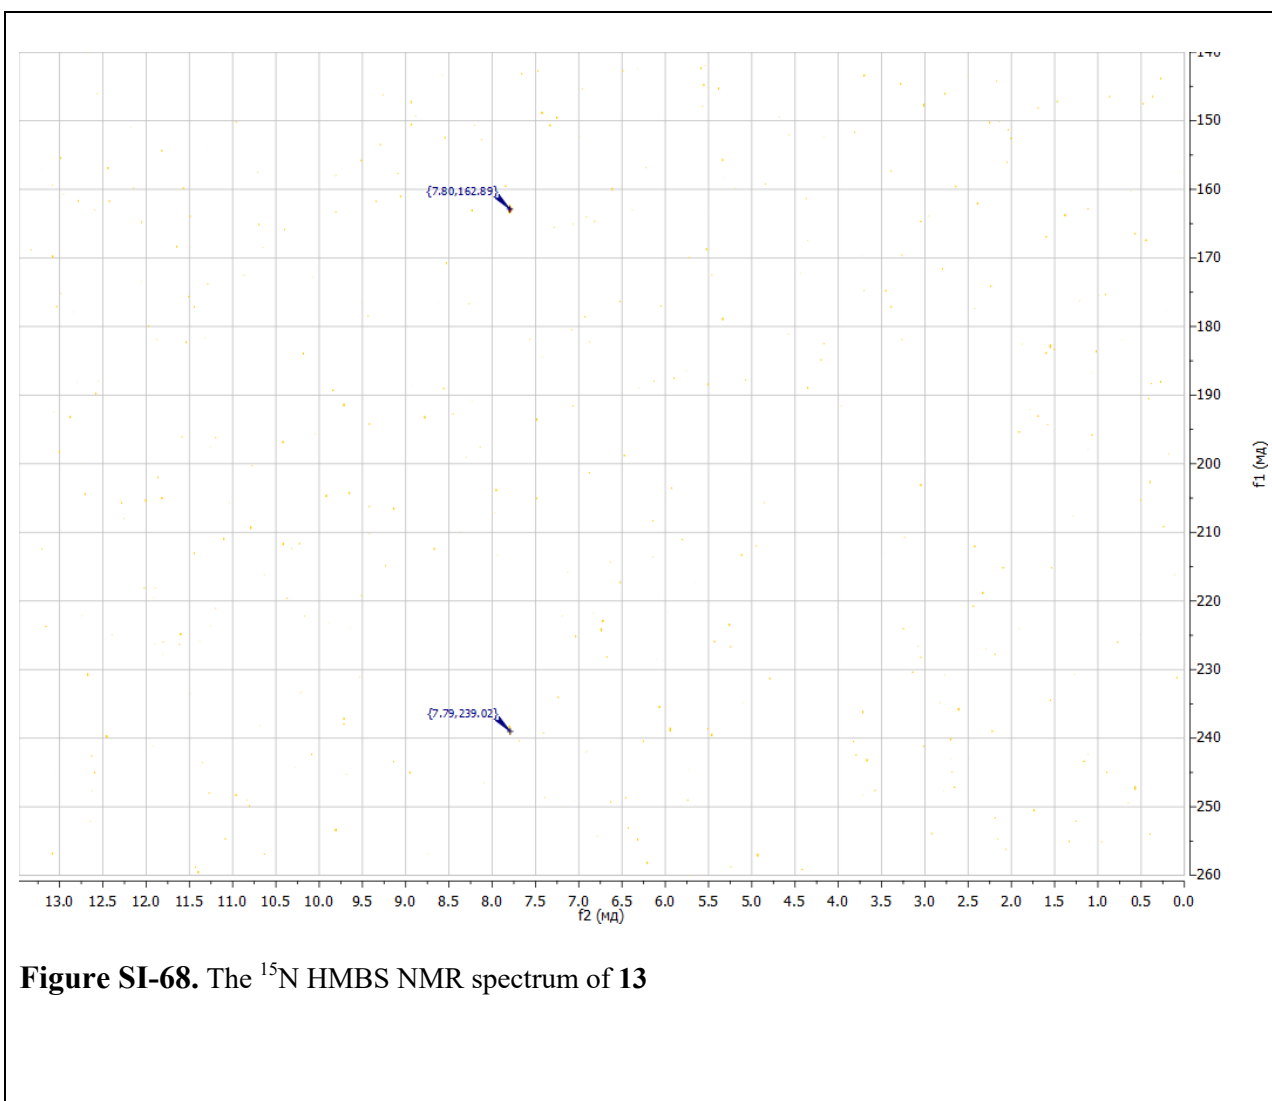

**Figure SI-68.** The  $^{15}\text{N}$  HMBS NMR spectrum of **13**

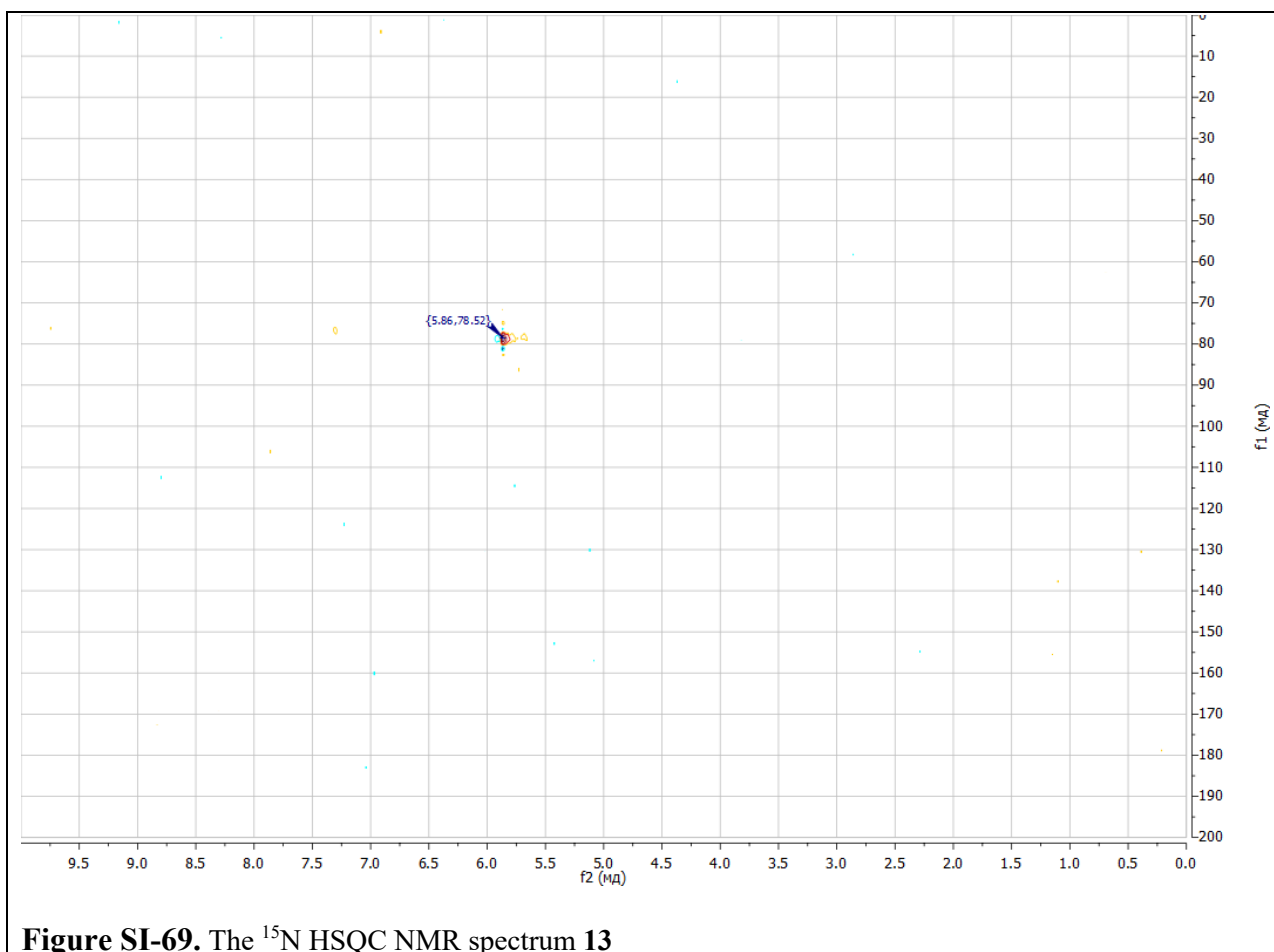

**Figure SI-69.** The  $^{15}\text{N}$  HSQC NMR spectrum **13**

## SAMPLE INFORMATION

|                   |               |                  |                     |
|-------------------|---------------|------------------|---------------------|
| Sample Name:      |               | Acquired By:     | System              |
| Sample Type:      | Unknown       | Date Acquired:   | 24.06.2013 12:20:09 |
| Vial:             | 1             | Acq. Method:     | 70B_dual_280nm      |
| Injection #:      | 1             | Date Processed:  | 24.06.2013 12:30:38 |
| Injection Volume: | 10,00 ul      | Channel Name:    | 2487Channel 1       |
| Run Time:         | 15,00 Minutes | Sample Set Name: |                     |
| Column Type:      |               |                  |                     |

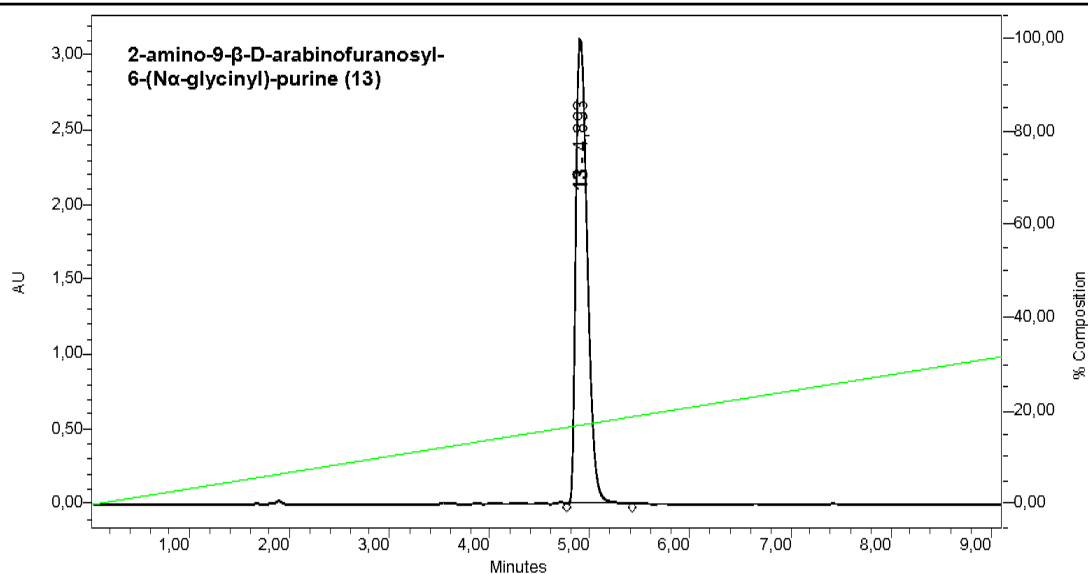

|   | Peak Name | RT (min) | Area (AU*sec) | % Area | Height (AU) | % Height |
|---|-----------|----------|---------------|--------|-------------|----------|
| 1 | 13        | 4,893    | 25103877      | 100,00 | 3172925     | 100,00   |

**Figure SI-70.** The chromatogram

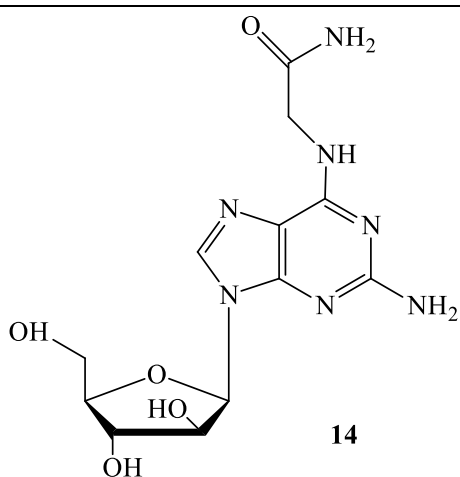

**2-amino-9-β-D-arabinofuranosyl-6-(N<sup>g</sup>-glycinylamido)-purine (14)**

A mixture of 35 mg (0.166 mmol) N-(2-amino-9H-purin-6-yl)-glycineamide (Method for the synthesis heterobase was described in (Krasnov, Vigorov et al. 2015, Gruzdev, Vigorov et al. 2016), 62 mg (0.25 mmol) AraU ) was dissolved in 50 ml (10mM) KH<sub>2</sub>PO<sub>4</sub> buffer solution (68 mg, pH = 7.0) was thermostated at 55°C for 196 h. The enzyme 140 e.u. PNP *E.coli*, 85 e.u. UP *E.coli* was added and the reaction mixtures for 196 h. After removing the solvent from the reaction mixture in a vacuum (15 mm Hg) separation of the components was carried out on a reverse phase sorbent Octadecyl=Si 100polyol (0.03 mm). The target compound was eluted with a gradient of 1-7% acetonitrile in water. Fractions containing the product were combined, the solvent was removed in vacuum (15 mm Hg). The product was dried in vacuum (5 mm Hg) over phosphorus pentoxide. The target arabinoside was obtained in 91% yield (0.052 g, 0.276 mmol) and 96.75% purity (Rt = 4.4 min, gradient flow 0-100% B over 20 minutes, column Nova Pak C18, 4.6×150 mm, 5 mkm, flow rate 1 ml/min, Eluent A: water + 0.1% TFA. Eluent B: 70% acetonitrile: 30% water + 0.1% TFA). [α]<sub>D</sub><sup>25</sup> = 33.6 (c 0.125, H<sub>2</sub>O/DMSO 1:1). M.p. 168 -171°C; λ<sub>max</sub> 281nm, extinction coefficient 8891. M/z C<sub>12</sub>H<sub>16</sub>N<sub>6</sub>O<sub>6</sub>: [M+H]<sup>+</sup>: 340.1369 calcd, 340.1565 found.

<sup>1</sup>H NMR (700 MHz, DMSO-*d*<sub>6</sub>, 30 °C): δ= 7.79 (s, 1H, H-8), 8.12 and 8.01 (br.s., 0.65H, C6-NH), 7.27 (s, 1H, CO-NH), 7.01 (s, 1H, CO-NH), 6.08 (d, *J* = 4.6 Hz, 1H, H-1'), 5.87 (s., 2H, 2-NH<sub>2</sub>), 5.61 (br.d, *J* ~3 Hz, 1H, 2'-OH), 5.46 (d, *J* = 3.8 Hz, 1H, 3'-OH), 5.06 (br.sign., 1H, 5'-OH), 4.08 (m, 1H, H-2'), 4.02 (m, 1H, H-3'), 3.98 (br.sign., 2H, NH-CH<sub>2</sub>), 3.74 (m, 1H, H-4'), 3.65 (m, 1H, H-5'a), 3.60 (m, 1H, H-5'b) ppm.

<sup>13</sup>C NMR (176 MHz, DMSO-*d*<sub>6</sub>, 30 °C) δ= 160.48 (C4), 137.51 (C8), 113.26 (C5), 84.65 (C4'), 83.70

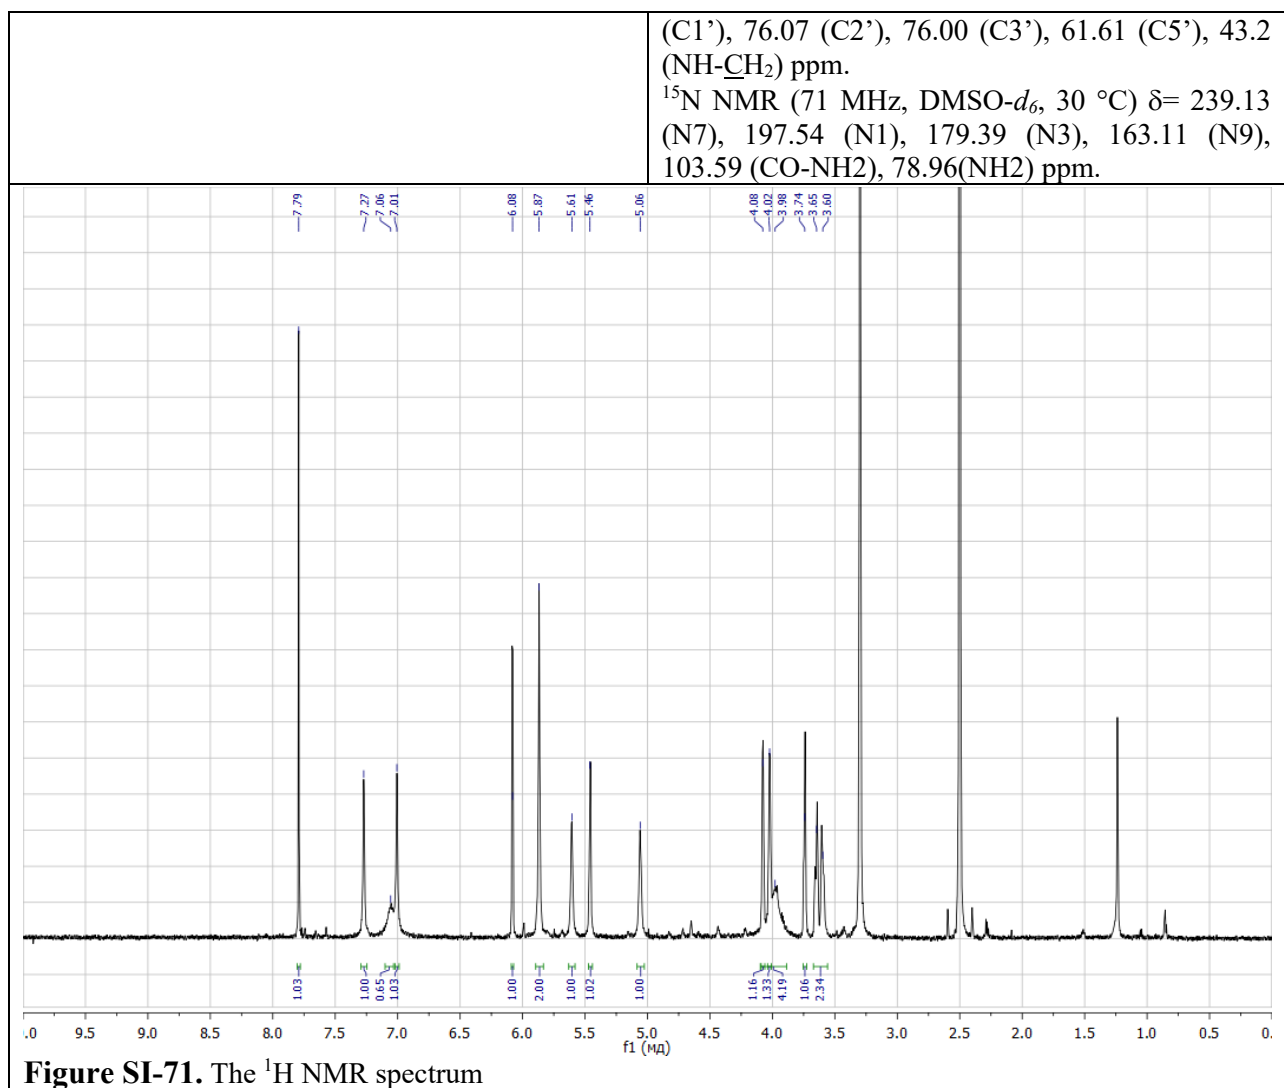

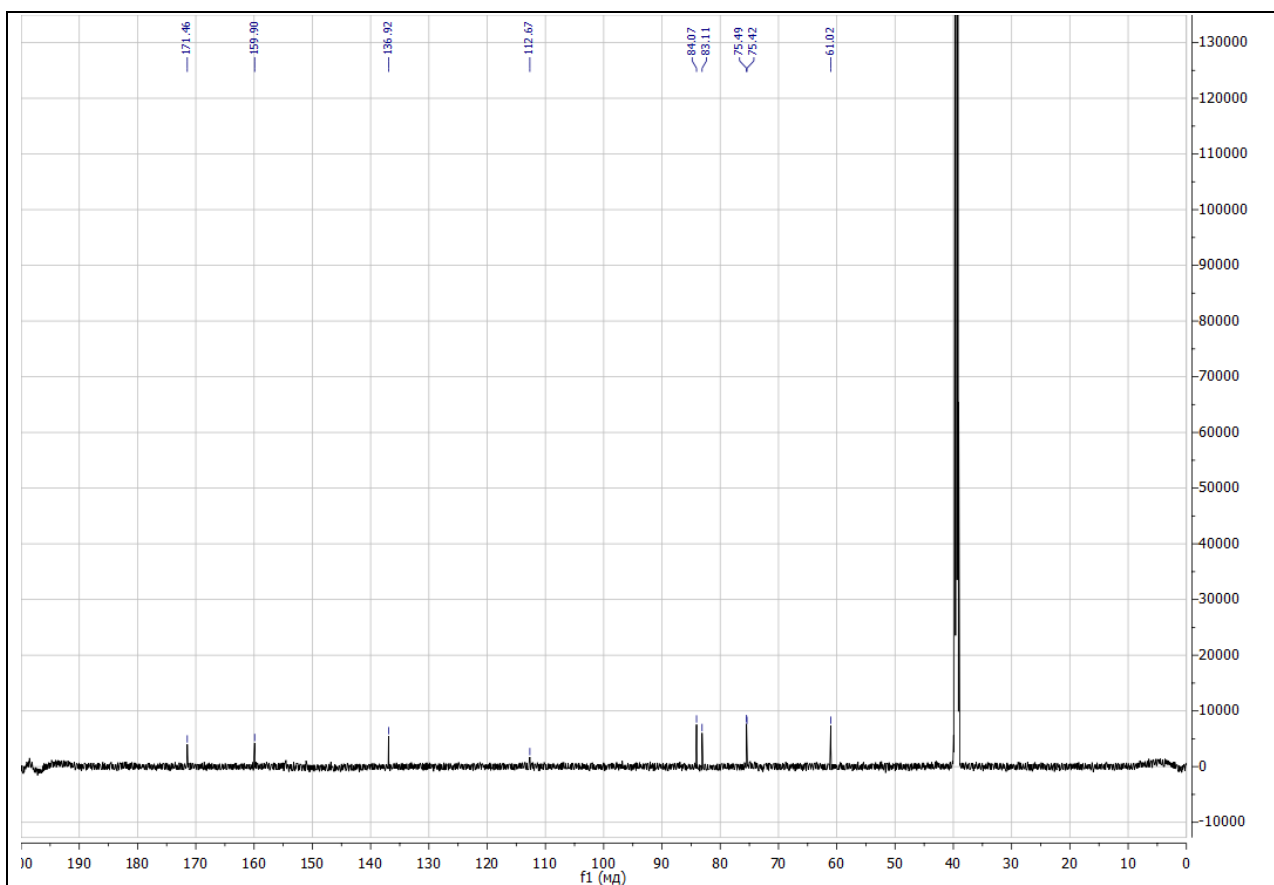

**Figure SI-72.** The  $^{13}\text{C}$  NMR spectrum

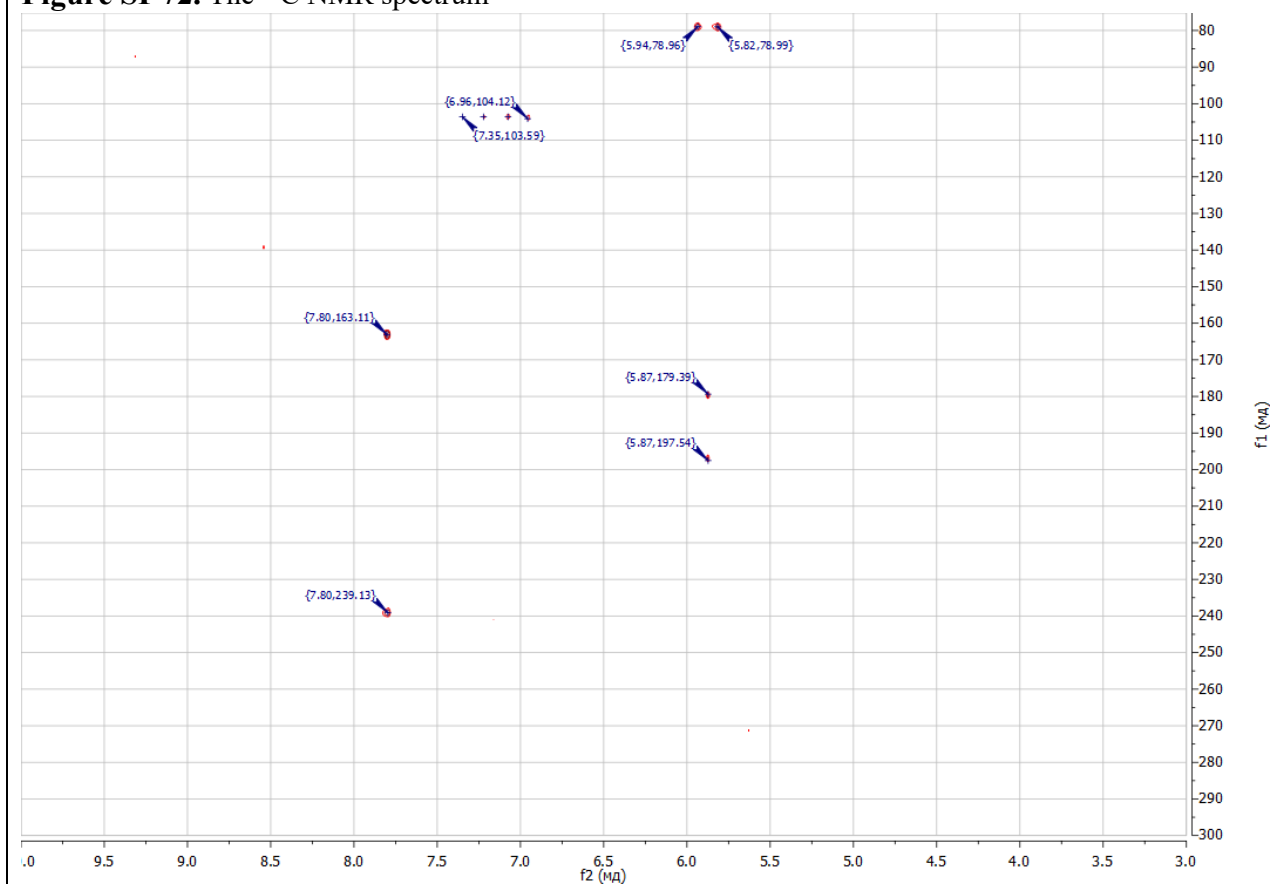

**Figure SI-73.** The  $^{15}\text{N}$  HSQC NMR spectrum

BT

Project Name: TESTLast\_1  
Reported by User: System

Breeze

## SAMPLE INFORMATION

|                   |               |                  |                     |
|-------------------|---------------|------------------|---------------------|
| Sample Name:      |               | Acquired By:     | System              |
| Sample Type:      | Unknown       | Date Acquired:   | 12.05.2014 11:33:59 |
| Vial:             | 1             | Acq. Method:     | 100B_dual_280       |
| Injection #:      | 2             | Date Processed:  | 19.05.2014 12:45:52 |
| Injection Volume: | 5,00 ul       | Channel Name:    | 2487Channel 2       |
| Run Time:         | 20,00 Minutes | Sample Set Name: |                     |
| Column Type:      |               |                  |                     |

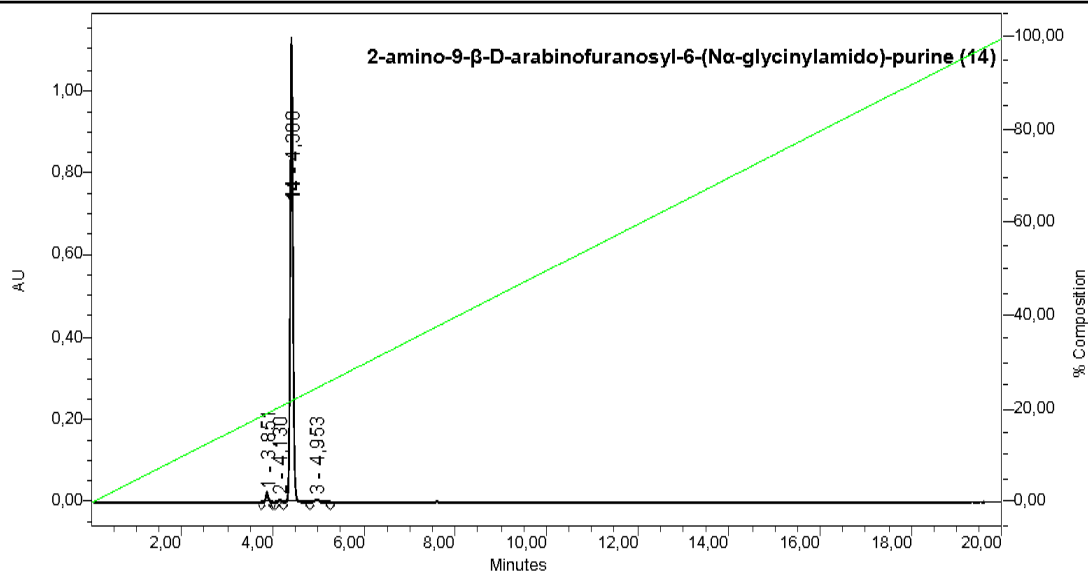

|   | Peak Name | RT (min) | Area (V*sec) | % Area | Height (V) | % Height |
|---|-----------|----------|--------------|--------|------------|----------|
| 1 | 1         | 3,851    | 96489        | 1,99   | 22800      | 2,01     |
| 2 | 2         | 4,130    | 30208        | 0,62   | 6564       | 0,58     |
| 3 | 14        | 4,388    | 4659473      | 96,20  | 1097548    | 96,75    |
| 4 | 3         | 4,953    | 57231        | 1,18   | 7467       | 0,66     |

Report Method: Gradient Overlay Report ASC

Printed 12:45:59

19.05.2014

Page: 1 of 1

Figure SI-74. The chromatogram

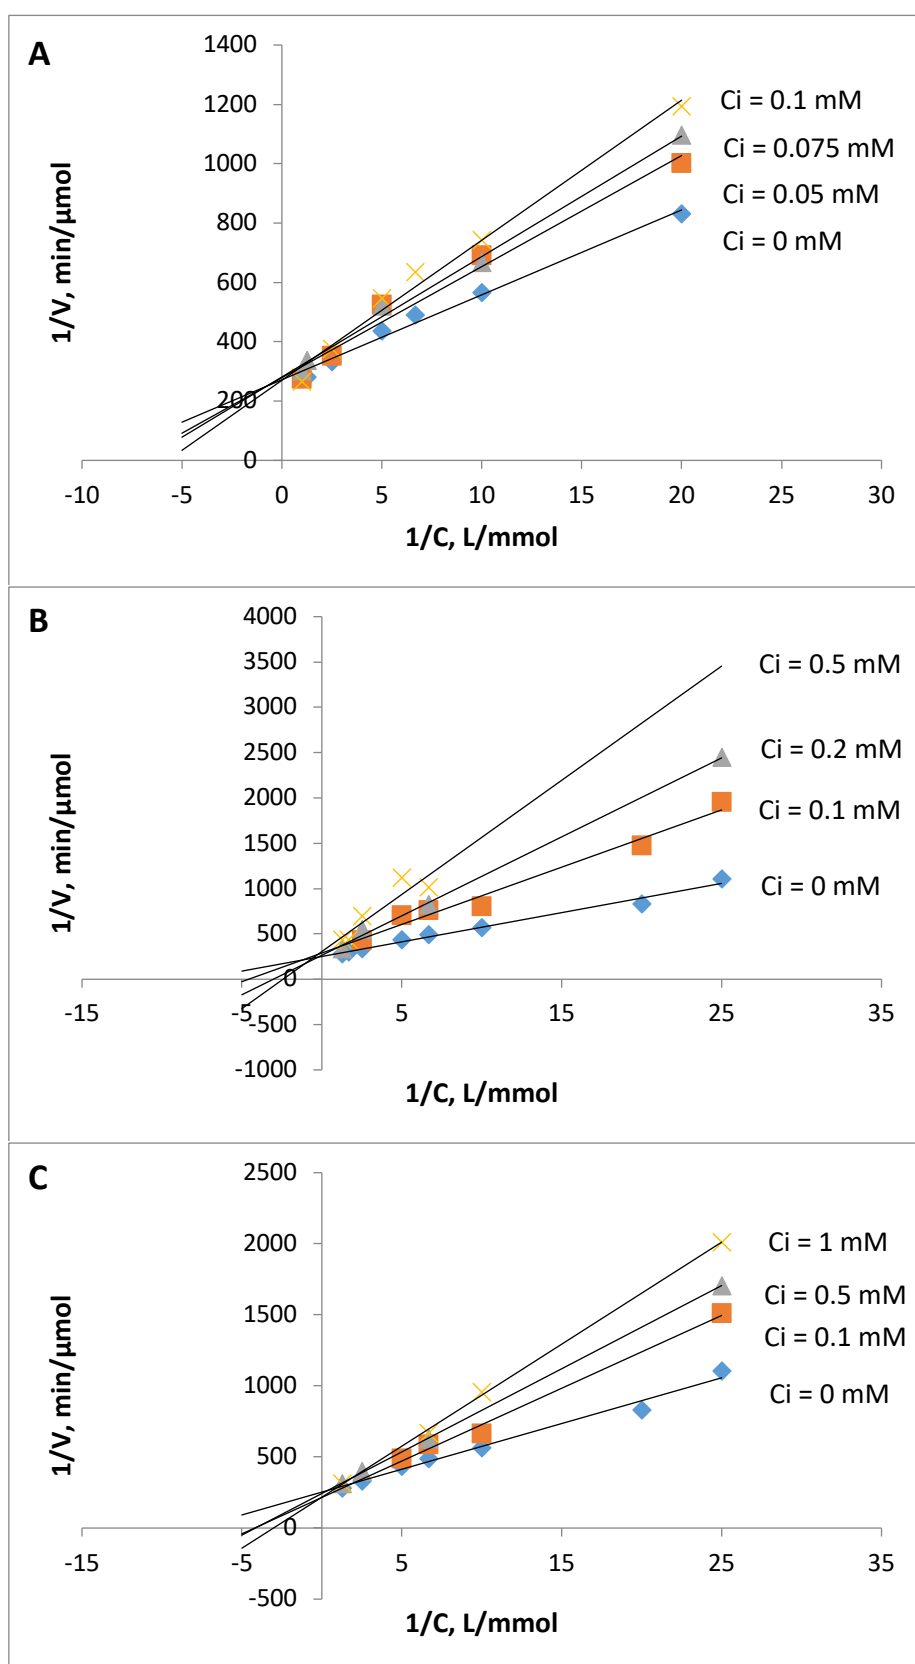

**Figure SI-75.** Lineweaver-Burk plots for the adenosine deamination at various concentrations of 2-chloroadenosine (A), 2-chloro-arabinoadenosine (B) and 4b (C).
